# 1 **Ecological divergence in sympatry causes** 2 **gene misregulation in hybrids**

3 Joseph A. McGirr<sup>1</sup>, Christopher H. Martin<sup>2</sup>

4  
5  
6  
7  
8  
9  
10  
11  
12  
13  
14  
15  
16  
17  
18  
19  
20  
21  
22

Classification: Biological Sciences

<sup>1</sup>Department of Biology, University of North Carolina, Chapel Hill, NC 27514

<sup>2</sup>Department of Integrative Biology and Museum of Vertebrate Zoology, University of California, Berkeley, CA 94720

Correspondence: Christopher H. Martin. Department of Integrative Biology and Museum of Vertebrate Zoology, University of California, Berkeley, CA 94720

Email: [chmartin@berkeley.edu](mailto:chmartin@berkeley.edu)

Keywords: RNAseq, gene misregulation, ecological speciation, allele specific expression, Dobzhansky-Muller incompatibility, transcriptomics

Word count abstract: 216; Word count main text: 4,145; Figures: 4

23 **Abstract**

24 Ecological speciation occurs when reproductive isolation evolves as a byproduct of adaptive  
25 divergence between populations. However, it is unknown whether divergent ecological selection  
26 on gene regulation can directly cause reproductive isolation. Selection favoring regulatory  
27 divergence between species could result in gene misregulation in F1 hybrids and ultimately  
28 lower hybrid fitness. We combined 58 resequenced genomes with 124 transcriptomes to test this  
29 hypothesis in a young, sympatric radiation of *Cyprinodon* pupfishes endemic to San Salvador  
30 Island, Bahamas, which consists of a dietary generalist and two novel trophic specialists – a  
31 molluscivore and a scale-eater. We found more differential gene expression between closely  
32 related sympatric specialists than between allopatric generalist populations separated by 1000  
33 km. Intriguingly, 9.6% of genes that were differentially expressed between sympatric species  
34 were also misregulated in their F1 hybrids. Consistent with divergent ecological selection  
35 causing misregulation, a subset of these genes were in highly differentiated genomic regions and  
36 enriched for functions important for trophic specialization, including head, muscle, and brain  
37 development. These regions also included genes that showed evidence of hard selective sweeps  
38 and were significantly associated with oral jaw length – the most rapidly diversifying skeletal  
39 trait in this radiation. Our results indicate that divergent ecological selection in sympatry can  
40 cause hybrid gene misregulation which may act as a primary reproductive barrier between  
41 nascent species.

42

43

44

45

46

47

48

49

## 50 **Significance**

51 It is unknown whether the same genes that regulate ecological traits can simultaneously  
52 contribute to reproductive barriers between species. We measured gene expression in two trophic  
53 specialist species of *Cyprinodon* pupfishes that rapidly diverged from a generalist ancestor. We  
54 found genes differentially expressed between species that also showed extreme expression levels  
55 in their hybrid offspring. Many of these genes showed signs of selection and have putative  
56 effects on the development of traits that are important for ecological specialization. This suggests  
57 that genetic variants contributing to adaptive trait divergence between parental species negatively  
58 interact to cause hybrid gene misregulation, potentially producing unfit hybrids. Such loci may  
59 be important barriers to gene flow during the early stages of speciation, even in sympatry.

60

61

62

63

64

65

66

67

68

69

70

71

72

73

74

## 75 **Introduction**

76 Adaptive radiations showcase dramatic instances of biological diversification resulting from  
77 ecological speciation, which occurs when reproductive isolation (RI) evolves as a byproduct of  
78 adaptive divergence between populations (1, 2). Ecological speciation predicts that populations  
79 adapting to different niches will accumulate genetic differences due to divergent ecological  
80 selection, indirectly resulting in reduced gene flow. Gene regulation is a major target of selection  
81 during adaptive divergence, with many known cases of divergent gene regulation underlying  
82 ecological traits (3–7). However, it is still unknown whether divergent ecological selection on  
83 gene regulation contributes to reproductive barriers during speciation (8, 9).

84 Hybridization between ecologically divergent populations can break up coadapted  
85 genetic variation, resulting in (Bateson) Dobzhansky-Muller incompatibilities (DMIs) if  
86 divergent alleles from parental populations are incompatible in hybrids and cause reduced fitness  
87 (10, 11). DMIs can result in gene misregulation: transgressive expression levels that are  
88 significantly higher or lower in F1 hybrids than either parental population. Because gene  
89 expression is largely constrained by stabilizing selection, gene misregulation in hybrids is  
90 expected to disrupt highly coordinated developmental processes and reduce fitness (12, 13).  
91 Indeed, crosses between distantly related species show that misregulation is often associated with  
92 reduced hybrid fitness in the form of hybrid sterility and inviability (i.e. intrinsic postzygotic  
93 isolation) (14–16). DMIs causing these forms of strong intrinsic isolation evolve more slowly  
94 than premating isolating barriers and are traditionally modeled as fixed genetic variation between  
95 allopatric populations (11).

96 However, it is unknown whether hybrid gene misregulation also contributes to RI during  
97 the early stages of speciation, particularly for populations diverging in sympatry (9, 17, 18).  
98 Either segregating or fixed alleles causing gene misregulation in hybrids could disrupt  
99 developmental processes resulting in genetic incompatibilities (intrinsic postzygotic isolation) or  
100 reduced performance under natural conditions (extrinsic postzygotic isolation). Emerging  
101 evidence suggests that weak intrinsic DMIs segregate within natural populations (19) and are  
102 abundant between recently diverged species, reaching hundreds of incompatibility loci within  
103 swordtail fish hybrid zones (20, 21). Furthermore, hybrid gene misregulation has been reported

104 at early stages of divergence within a species of intertidal copepod (22) and between young  
105 species of lake whitefish (23).

106 We hypothesized that regulatory genetic variants causing adaptive expression divergence  
107 between sympatric species may negatively interact to cause misregulation and reduced fitness in  
108 hybrids. Such incompatible alleles could promote rapid speciation because they would  
109 simultaneously contribute to adaptive trait divergence and reduce gene flow between populations  
110 (18, 24, 25). Here we tested this hypothesis in a young (10 kya), sympatric radiation of  
111 *Cyprinodon* pupfishes endemic to San Salvador Island, Bahamas. This radiation consists of a  
112 dietary generalist and two derived specialists adapted to novel trophic niches: a molluscivore (*C.*  
113 *brontotheroides*) and a scale-eater (*C. desquamator*) (26). Hybrids among these species exhibit  
114 reduced fitness in the wild and impaired feeding performance in the lab (27, 28). We took a  
115 genome-wide approach to identify genetic variation underlying F1 hybrid gene misregulation  
116 and found 125 ecological DMI candidate genes that were misregulated, highly differentiated  
117 between populations, and strikingly enriched for developmental functions related to trophic  
118 specialization. Our findings show that regulatory variation underlying adaptive changes in gene  
119 expression can interact to cause hybrid gene misregulation, which may contribute to reduced  
120 hybrid fitness and restrict gene flow between sympatric populations.

121

## 122 **Results**

### 123 **Trophic specialization, not geographic distance, drives major changes in gene expression** 124 **and hybrid gene misregulation**

125 We sampled two lake populations on San Salvador Island (Crescent Pond and Osprey Lake) in  
126 which generalist pupfish coexist with the endemic molluscivore and scale-eater specialist  
127 species. We also collected outgroup generalist populations from North Carolina, USA and New  
128 Providence Island, Bahamas (Fig. 1A). Wild caught fishes and their F1 offspring were reared in a  
129 common laboratory environment. Overall, genetic divergence increased with geographic distance  
130 between allopatric generalist populations and was lowest between sympatric populations (Table  
131 S1; genome-wide mean  $F_{st}$  measured across 13.8 million SNPs: San Salvador generalists vs.  
132 North Carolina = 0.217; vs. New Providence = 0.155; vs. scale-eaters = 0.106; vs. molluscivores

133 = 0.056). We tested whether isolation by distance explained patterns of gene expression  
134 divergence and hybrid gene misregulation while controlling for phylogenetic relatedness using a  
135 maximum likelihood tree estimated with RAxML from 1.7 million SNPs (Fig. 1; Fig. S1).  
136 Geographic distance among populations was a significant predictor of the proportion of  
137 differential gene expression between populations at two days post fertilization (2 dpf) (Fig. 1B;  
138 phylogenetic generalized least squares (PGLS);  $P = 0.02$ ). This is consistent with a model of  
139 gene expression evolution governed largely by stabilizing selection and drift (29, 30). However,  
140 at eight days post fertilization (8 dpf), when craniofacial structures of the skull begin to ossify  
141 (31), geographic distance was no longer associated with differential expression (Fig. 1C; PGLS;  
142  $P = 0.18$ ), which was higher between sympatric trophic specialist species on San Salvador Island  
143 than between generalist populations spanning 1000 km across the Caribbean.

144 Geographic distance between parental populations was not associated with gene  
145 misregulation in F1 hybrids at either developmental stage (Fig. 1D and E; PGLS; 2 dpf  $P = 0.17$ ;  
146 8dpf  $P = 0.38$ ). 9.3% of genes were misregulated in specialist F1 hybrids (Fig. 1E; Crescent  
147 Pond molluscivore  $\times$  scale-eater), comparable to species pairs with much greater divergence  
148 times (16, 32). Out of 3,669 misregulated genes containing heterozygous sites in F1 hybrids that  
149 were homozygous in parents, 819 (22.3%) showed allele specific expression and were not  
150 differentially expressed between parental populations – patterns consistent with compensatory  
151 regulation underlying misregulation (Fig. S2-4, Table S2).

152

### 153 **Genes showing divergent expression between species are also misregulated in their F1** 154 **hybrids**

155 We used two approaches to identify gene misregulation associated with ecological divergence  
156 between species. First, we found 716 genes that showed differential expression between San  
157 Salvador species that were also misregulated in their F1 hybrids (Fig. 2, Table S3). Nearly all  
158 these genes (99.4%) were misregulated in only one lake population and 69.8% were only  
159 misregulated at 8 dpf in comparisons involving scale-eaters (Fig. 2A-H). Four genes showed  
160 differential expression between species and hybrid misregulation in both lake comparisons  
161 (*trim47*, *krt13*, *s100a1*, *elovl7*; Table S4).

162           Second, we identified genes showing parallel expression divergence in both specialist  
163 species relative to generalists that were misregulated in specialist F1 hybrids (Fig. 3). This  
164 pattern likely results from parallel expression in molluscivores and scale-eaters controlled by  
165 different genetic mechanisms (33). Significantly more genes showed differential expression in  
166 both specialist comparisons than expected by chance (Fig. 3A-D; Fisher's exact test,  $P < 2.7 \times$   
167  $10^{-5}$ ). Of these, 96.6% (1,206) showed the same direction of expression in specialists relative to  
168 generalists, which was more than expected under a neutral model of gene expression evolution  
169 (Fig. 3E and F; binomial test,  $P < 1.0 \times 10^{-16}$ ). 45 of the 1,206 genes showing parallel expression  
170 divergence in specialists also showed misregulation in specialist F1 hybrids (Fig. 3F). Eight of  
171 these genes were severely misregulated to the extent that they were differentially expressed in  
172 hybrids relative to all other populations in our dataset. For example, *sypl1* showed significantly  
173 higher expression in 8 dpf Crescent Pond molluscivore  $\times$  scale-eater F1 hybrids than all other  
174 crosses spanning 1000 km from San Salvador Island, Bahamas to North Carolina, USA ( $P = 2.35$   
175  $\times 10^{-4}$ ; Fig. 3G). Overexpression of this gene is associated with epithelial-mesenchymal  
176 transition, an important process during cranial neural crest cell migration (34, 35). Similarly,  
177 *scn4a* showed significantly lower expression in 8 dpf Crescent Pond specialist F1 hybrids than  
178 all other crosses ( $P = 5.49 \times 10^{-4}$ ; Fig. 3H). Mutations in this gene are known to cause  
179 paramyotonia congenita, a disorder causing weakness and stiffness of craniofacial skeletal  
180 muscles (36).

181

## 182 **Misregulated genes under selection influence adaptive ecological traits in trophic specialists**

183 Out of 750 total unique genes identified above as differentially expressed between populations  
184 and misregulated in F1 hybrids, 125 (17%) were within 20 kb of SNPs that were fixed between  
185 populations ( $F_{st} = 1$ ) and within 20 kb windows showing high absolute genetic divergence  
186 between populations ( $D_{xy} \geq$  genome-wide 90<sup>th</sup> percentile; range: 0.0031 – 0.0075; Table S1).  
187 This set of 125 genes, which we refer to as ecological DMI candidate genes, was significantly  
188 enriched for functional categories highly relevant to divergent specialist phenotypes, including  
189 head development, brain development, muscle development, and cellular response to nitrogen  
190 (FDR = 0.05; Fig. 4A, Table S5).

191 26 (20.8%) of these ecological DMI candidate genes showed strong evidence of a hard  
192 selective sweep in specialists (negative Tajima's  $D <$  genome-wide 10<sup>th</sup> percentile; range: -1.62 –  
193 -0.77; SweeD composite likelihood ratio  $>$  90<sup>th</sup> percentile by scaffold; Table S6 and S7) and 16  
194 of these showed at least a two-fold expression difference in F1 hybrids compared to purebred F1.  
195 Several ecological DMI candidate genes have known functions that are compelling targets for  
196 divergent ecological selection. For example, the autophagy-related gene *map1lc3c* has been  
197 shown to influence growth when cells are nitrogen deprived (37, 38). Given that specialists  
198 occupy higher trophic levels than generalists, as shown by stable isotope ratios ( $\delta^{15}N$ ; Fig. 5B),  
199 expression changes in this gene may be important adaptations to nitrogen-rich diets. Similarly,  
200 expression changes in the ten genes annotated for effects on brain development may influence  
201 divergent behavioral adaptations associated with trophic specialists, including significantly  
202 increased aggression (39) and female mate preferences (40).

203 Using a genome-wide association mapping method that accounts for genetic structure  
204 among populations (41), we found that nine of the 125 genes in differentiated regions were  
205 significantly associated with oral jaw size – the most rapidly diversifying skeletal trait in this  
206 radiation (GEMMA PIP  $>$  99<sup>th</sup> percentile; Table S8; Fig. S5). For example, we found that *mpp1*  
207 was near 170 SNPs fixed between Crescent Pond generalists and scale-eaters, showed evidence  
208 of a hard selective sweep in both populations, and was differentially expressed due to *cis*-  
209 regulatory mechanisms (Fig. 4F-I). F1 hybrids showed a 3-fold decrease in expression of *mpp1*  
210 ( $P = 0.001$ ; Fig. 4F). Knockouts of this gene were recently shown to cause severe craniofacial  
211 defects in humans and mice (42). The other eight genes significantly associated with jaw size  
212 have not been previously shown to influence cranial phenotypes, but some have known functions  
213 in cell types relevant to craniofacial development (Table S8). For example, the gene *sema6c*,  
214 which shows strong signs of selection in both scale-eaters and molluscivores (Fig. S6), is known  
215 to be expressed at neuromuscular junctions and is important for neuron growth and development  
216 within skeletal muscle (43). Expression changes in this gene may influence the development of  
217 jaw closing muscles (adductor mandibulae), which tend to be larger in specialists relative to  
218 generalists (Fig. 5B). Overall, we found candidate regulatory variants under selection that likely  
219 contribute to hybrid gene misregulation and demonstrate that genes near these variants are  
220 strikingly enriched for developmental functions related to divergent adaptive traits.



221

## 222 **Discussion**

223 By combining whole genome sequencing with transcriptomic analyses of developing tissues in  
224 recently diverged trophic specialists and their F1 hybrids, we provide a genome-wide view of  
225 how ecological selection can directly result in genetic incompatibilities causing gene  
226 misregulation in hybrids, even in sympatry. Our results are consistent with negative epistatic  
227 interactions between alleles from different parental genomes affecting 750 genes (3% of the  
228 transcriptome) that show differential expression between species and misregulation in F1  
229 hybrids. 125 of these genes were in highly differentiated regions of the genome containing SNPs  
230 fixed between specialists which were enriched for developmental processes relevant to trophic  
231 specialization, suggesting that misregulation of these candidate genes in F1 and later generations  
232 of hybrids may disrupt the function of adaptive traits and contribute to reproductive isolation  
233 between these nascent species.

234 The negative fitness consequences associated with hybrid gene misregulation are well  
235 documented in many systems (14–16, 44, 45), but most of this research has focused on genes  
236 associated with sterility and inviability between highly divergent species (but see (23)). It is clear  
237 that these strong intrinsic postzygotic isolating barriers evolve more slowly than premating  
238 barriers (11, 46, 47); however, hybrid gene misregulation may also have non-lethal effects on  
239 fitness and performance that could evolve before or alongside premating isolating mechanisms.  
240 Additionally, if genes that are differentially expressed between species in developing tissues are  
241 important for adaptive trait divergence, then misregulation of those genes could contribute to  
242 abnormal phenotypes that are ecologically maladaptive (18, 23, 48). We previously found  
243 extensive gene misregulation specific to craniofacial tissues, which were dissected from  
244 generalist  $\times$  molluscivore F1 hybrids at an early developmental stage (49). Furthermore, F2 and  
245 later generation hybrids showing more transgressive phenotypes exhibited the lowest survival  
246 and growth rate in field enclosures across multiple lakes and multiple independent field  
247 experiments on San Salvador Island (27, 50). In the lab, generalist  $\times$  scale-eater F1 hybrids  
248 exhibited non-additive and impaired feeding performance on scales (28). Overall, these  
249 independent lines of evidence suggest that hybrids among San Salvador Island species suffer  
250 reduced performance and survival in both laboratory and field environments, which may result

251 from misregulation of genes that are necessary for the normal development of their adaptive  
252 traits.

253 If divergent ecological selection on adaptive traits also causes gene misregulation and  
254 subsequently reduced performance and survival of hybrids in the wild, then these ecological  
255 DMIs may promote rapid speciation, analogous to the mechanism of magic traits (51). For  
256 example, whereas magic traits contribute to RI through assortative mating as a byproduct of  
257 divergent ecological selection, these ecological DMIs contribute to RI through gene  
258 misregulation and reduced hybrid fitness (18). Thus, our results support a mechanism for  
259 divergent ecological selection to generate RI as a byproduct since many adaptive traits are  
260 expected to evolve by divergent gene regulation that may come into conflict in a hybrid genetic  
261 background (9, 18).

262 Mathematical models and simulations suggest that genetic incompatibilities evolve most  
263 rapidly under directional selection (52, 53), and evolve more slowly under stabilizing selection  
264 when compensatory *cis* and *trans* variants have opposing effects on expression levels (52). We  
265 see evidence for both types of selection driving misregulation. 22.3% of all misregulated genes  
266 showed expression patterns consistent with compensatory regulation, a signature of stabilizing  
267 selection (Table S2). However, 26 ecological DMI candidate genes in highly differentiated  
268 genomic regions showed strong evidence of hard selective sweeps due to directional selection  
269 (Table S6), and more genes may have experienced soft sweeps that were not detected by our  
270 methods. Although scale-eaters from Crescent Pond and Osprey Lake form a monophyletic  
271 group (Fig. S1), we found little overlap in misregulated genes between lakes (Fig. 2). This may  
272 result from selection on Caribbean-wide standing genetic variation that has similar effects on  
273 expression, as we showed previously (33), and could reflect polymorphic incompatibilities  
274 segregating within species (19). We also see distinct intraspecific differences between lake  
275 populations of trophic specialists in pigmentation, maxillary protrusion, and other traits (54),  
276 consistent with divergent regulatory variation underlying these adaptive phenotypes.

277 Identifying genetic variation that contributes to adaptive variation and studying its effect  
278 on reproductive isolation is important to understand the sequence of molecular changes leading  
279 to ecological speciation. We show that ecologically relevant genes near differentiated genetic  
280 regions between sympatric species are under selection and misregulated in F1 hybrids. Overall,

281 our results are consistent with previous observations that hybrid incompatibility alleles are often  
282 segregating within populations (17, 19, 55, 56) and that hundreds of genetic incompatibilities can  
283 contribute to reproductive isolation between species at the earliest stages of divergence (21). We  
284 extend this emerging consensus by showing that gene misregulation can result as a byproduct of  
285 divergent ecological selection on a wide range of adaptive traits.

286

## 287 **Methods**

### 288 *Study system and sample collection*

289 We collected 51 wild-caught individuals from nine isolated hypersaline lakes on San Salvador  
290 Island, Bahamas, plus outgroup populations across the Caribbean (see supplemental methods).  
291 Our total mRNA transcriptomic dataset consisted of 124 *Cyprinodon* exomes from lab-reared  
292 embryos collected between 2017 and 2018. We collected fishes for breeding from two  
293 hypersaline lakes on San Salvador Island, Bahamas (Osprey Lake and Crescent Pond); Lake  
294 Cunningham, New Providence Island, Bahamas; and Fort Fisher, North Carolina, United States.

295 We performed 11 separate crosses falling into three categories. 1) For purebred crosses,  
296 we collected F1 embryos from breeding tanks containing multiple breeding pairs from a single  
297 location. 2) For San Salvador species crosses, we crossed a single individual of one species with  
298 a single individual of another species from the same lake for all combinations of the three San  
299 Salvador species. In order to control for maternal effects on gene expression inheritance, we  
300 collected samples from reciprocal crosses for three of the San Salvador species crosses. 3) For  
301 outgroup generalist crosses, we crossed a Crescent Pond generalist male with a Lake  
302 Cunningham female and a North Carolina female (Table S9).

303

### 304 *Sequencing and variant discovery*

305 Genomic resequencing libraries were prepared using TruSeq library preparation kits and  
306 sequenced on Illumina 150PE Hiseq4000. We mapped a total of 1,953,034,511 adaptor-trimmed  
307 reads to the *Cyprinodon* reference genome (57) with the Burrows-Wheeler Alignment Tool (58).  
308 We extracted RNA from a total of 348 individuals across two early developmental stages (2 days

309 post fertilization (dpf) and 8 dpf) using RNeasy Mini Kits (Qiagen, Inc.). For 2 dpf libraries, we  
310 pooled 5 embryos together and pulverized them in a 1.5 ml Eppendorf tube. We used the same  
311 extraction method for samples collected at 8 dpf but did not pool larvae. Libraries were prepared  
312 using TruSeq stranded mRNA kits and sequenced on 3 lanes of Illumina 150 PE Hiseq4000 at  
313 the Vincent J. Coates Genomic Sequencing Center. We mapped 1,638,067,612 adaptor-trimmed  
314 reads to the reference genome using the RNAseq aligner STAR with default parameters (59). We  
315 did not find a difference between species or outgroup populations for standard quality control  
316 measures, (Fig. S7; ANOVA,  $P > 0.1$ ), except for a marginal difference in transcript integrity  
317 numbers (Fig. S8; ANOVA,  $P = 0.041$ ) driven by slightly higher transcript quality in North  
318 Carolina generalist samples relative to other samples (Tukey post-hoc test:  $P = 0.043$ ). We found  
319 no significant differences among San Salvador Island generalists, molluscivores, scale-eaters,  
320 and outgroups in the proportion of reads that mapped to annotated features of the *Cyprinodon*  
321 reference genome (Fig. S9; ANOVA,  $P = 0.17$ ).

322 We used the Genome Analysis Toolkit (60) to call and refine SNP variants across 58  
323 *Cyprinodon* genomes and across 124 *Cyprinodon* exomes. We filtered both SNP datasets to  
324 include individuals with a genotyping rate above 90% and SNPs with minor allele frequencies  
325 higher than 5%. Our final filtered genomic SNP dataset included 13,838,603 variants with a  
326 mean sequencing coverage of 8.2× per individual. We further refined our transcriptomic SNP  
327 dataset using the allele-specific software WASP (v. 0.3.3) to correct for potential mapping biases  
328 that would influence tests of allele-specific expression (61, 62). We re-called SNPs using  
329 unbiased BAMs determined by WASP for a final transcriptomic SNP dataset that included  
330 413,055 variants with a mean coverage of 1,060× across features per individual.

331

### 332 ***Phylogenetic analyses***

333 In order to determine the relationship between expression divergence, F1 hybrid misregulation,  
334 and phylogenetic distance, we estimated a maximum likelihood tree using RAxML (63). We  
335 excluded all missing sites and sites with more than one alternate allele from our genomic SNP  
336 dataset, leaving 1,737,591 variants across 58 individuals for analyses. We performed ten separate  
337 searches with different random starting trees under the GTRGAMMA model. Node support was  
338 estimated from 1,000 bootstrap samples. We fit phylogenetic generalized least-squares (PGLS)

339 models in R with the packages ape (64) and nlme to assess whether gene expression patterns  
340 were associated with geographic distance among populations after accounting for phylogenetic  
341 relatedness among populations and species. We excluded Osprey Lake populations from these  
342 analyses because outgroups were only crossed with Crescent Pond generalists.

343

### 344 ***Population genomics and genome-wide association mapping***

345 If alleles causing gene expression divergence between species affect the development of adaptive  
346 traits, and also cause gene misregulation in hybrids resulting in low fitness, we predicted that  
347 genomic regions near these genes would be strongly differentiated between species, associated  
348 with divergent ecological traits, and show signatures of positive selection. We measured relative  
349 genetic differentiation ( $F_{st}$ ), within population diversity ( $\pi$ ), and between population divergence  
350 ( $D_{xy}$ ) across 58 *Cyprinodon* individuals using 13.8 million SNPs (Table S1 and S7). We  
351 identified 20 kb genomic windows significantly associated with variation in oral jaw size across  
352 all populations in our dataset (Table S8; Fig. S5). We measured upper jaw lengths and standard  
353 length for all individuals in our genomic dataset using digital calipers, fit a log-transformed jaw  
354 length by log-transformed standard length linear regression to correct for body size, and used the  
355 residuals for genome-wide association mapping with the software GEMMA (41). This program  
356 accounts for population structure by incorporating a genetic relatedness matrix into a Bayesian  
357 sparse linear mixed model which calculates a posterior inclusion probability (PIP) indicating the  
358 proportion of Markov Chain Monte Carlo iterations in which a SNP was estimated to have a non-  
359 zero effect on phenotypic variation. We used Tajima's D statistic and the software SweeD (65) to  
360 identify shifts in the site frequency spectrum characteristic of hard selective sweeps. We  
361 performed gene ontology enrichment analyses for candidate gene sets using ShinyGo (66).

362

### 363 ***Hybrid misregulation and inheritance of gene expression patterns***

364 We aggregated read counts with featureCounts (67) at the transcript isoform level (36,511  
365 isoforms corresponding to 24,952 protein coding genes). Significant differential expression  
366 between groups was determined with DESeq2 (68) using Wald tests comparing normalized  
367 posterior log fold change estimates and correcting for multiple testing using the Benjamini–

368 Hochberg procedure with a false discovery rate of 0.05 (69). We compared expression in F1  
369 hybrids to expression in F1 purebred offspring to determine whether genes showed additive,  
370 dominant, or transgressive patterns of inheritance in hybrids. To categorize hybrid inheritance for  
371 F1 offspring generated from a cross between a female from population A and a male from  
372 population B ( $F1_{(A \times B)}$ ), we conducted four pairwise differential expression tests with DESeq2: 1)  
373  $F1_{(A)}$  vs.  $F1_{(B)}$  2)  $F1_{(A)}$  vs.  $F1_{(A \times B)}$  3)  $F1_{(B)}$  vs.  $F1_{(A \times B)}$  4)  $F1_{(A)} + F1_{(B)}$  vs.  $F1_{(A \times B)}$ . Hybrid  
374 inheritance was considered additive if hybrid gene expression was intermediate between parental  
375 populations and significantly different between parental populations. Inheritance was dominant if  
376 hybrid expression was significantly different from one parental population but not the other.  
377 Genes showing misregulation in hybrids showed transgressive inheritance, meaning that hybrid  
378 gene expression was significantly higher (overdominant) or lower (underdominant) than both  
379 parental species (Fig. S10-12).

380

### 381 *Parallel changes in gene expression in specialists*

382 Parallel evolution of gene expression is often associated with convergent niche specialization,  
383 but parallel changes in expression may also underlie divergent specialization (33). We looked at  
384 the intersection of genes differentially expressed between generalists versus molluscivores and  
385 generalists versus scale-eaters to determine whether both specialists showed parallel changes in  
386 expression relative to generalists. We asked whether significant parallelism at the level of gene  
387 expression in specialists was mirrored by parallel regulatory mechanisms. We predicted that  
388 genes showing parallel changes in specialists would show conserved expression levels in  
389 specialist hybrids if they were controlled by the same (or compatible) regulatory mechanisms,  
390 but would be misregulated in specialist hybrids if expression was controlled by incompatible  
391 regulatory mechanisms. We identified genes showing conserved levels of expression in specialist  
392 hybrids (no significant difference in expression between F1 purebreds and F1 hybrids) and genes  
393 showing misregulation in specialist hybrids. We also identified genes showing misregulation in  
394 specialists relative to all other samples in our dataset across the Caribbean.

395

### 396 *Allele specific expression*

397 Our genomic dataset included every parent used to generate F1 hybrids between populations ( $n =$   
398 15). To categorize mechanisms of regulatory divergence between two populations, we used  
399 custom R and python scripts ([github.com/joemcgirr/fishfASE](https://github.com/joemcgirr/fishfASE)) to identify SNPs that were  
400 alternatively homozygous in breeding pairs and heterozygous in their F1 offspring. We counted  
401 reads across heterozygous sites using ASEReadCounter and matched read counts to maternal and  
402 paternal alleles. We identified significant ASE using a beta-binomial test comparing the maternal  
403 and paternal counts at each gene transcript with the R package MBASED (70). A transcript was  
404 considered to show ASE if it showed significant ASE in all F1 hybrid samples generated from  
405 the same breeding pair and did not show significant ASE in purebred F1 offspring from the same  
406 parental populations.

407

#### 408 **Acknowledgements**

409 This study was funded by the University of North Carolina at Chapel Hill, the Miller Institute for  
410 Basic Research in the Sciences, NSF CAREER Award 1749764, and NIH/NIDCR R01  
411 DE027052 to CHM. Travel was supported by an SSE Rosemary Grant Award to JAM. We thank  
412 Aaron Comeault, Chris Willett, and Jennifer Coughlan for helpful comments on the manuscript;  
413 Daniel Matute, Emilie Richards, Michelle St. John, Bryan Reatini, and Sara Suzuki for valuable  
414 discussion; The Vincent J. Coates Genomics Sequencing Laboratory at the University of  
415 California, Berkeley for performing RNA library prep and Illumina sequencing; the Gerace  
416 Research Centre for logistics; and the Bahamian government BEST Commission for permission  
417 to conduct this research.

418

#### 419 **Data Availability**

420 All transcriptomic raw sequence reads are available as zipped fastq files on the NCBI BioProject  
421 database. Accession: PRJNA391309. Title: Craniofacial divergence in Caribbean Pupfishes. All  
422 R and Python scripts used for pipelines are available on Git ([github.com/joemcgirr/fishfASE](https://github.com/joemcgirr/fishfASE)).

423

424 1. Schluter D (2000) *The Ecology of Adaptive Radiation* (Oxford University Press, Oxford).



- 425 2. Nosil P (2012) *Ecological Speciation* (Oxford University Press, Oxford).  
426 3. Thompson AC, et al. (2018) A novel enhancer near the *Pitx1* gene influences  
427 development and evolution of pelvic appendages in vertebrates. *Elife* 7:1–21.  
428 4. Parry JW, et al. (2005) Mix and match color vision: Tuning spectral sensitivity by  
429 differential opsin gene expression in Lake Malawi cichlids. *Curr Biol* 15(19):1734–1739.  
430 5. Abzhanov A, Protas M, Grant BR, Grant PR, Tabin CJ (2011) Variation of beaks in  
431 Darwin’s finches. *Science* 312(5982):1462–1466.  
432 6. Jones FC, et al. (2012) The genomic basis of adaptive evolution in threespine  
433 sticklebacks. *Nature* 484(7392):55–61.  
434 7. Manceau M, Domingues VS, Mallarino R, Hoekstra HE (2011) The developmental role  
435 of *Agouti* in color pattern evolution. *Science* 331(6020):1062–5.  
436 8. Mack KL, Nachman MW (2017) Gene regulation and speciation. *Trends Genet* 33(1):68–  
437 80.  
438 9. Pavey SA, Nosil P, Rogers SM (2010) The role of gene expression in ecological  
439 speciation. *Ann N Y Acad Sci* 1206:110–129.  
440 10. Orr HA (1996) Anecdotal, historical and critical commentaries on genetics. *Genetics*  
441 144:1331–1335.  
442 11. Coyne JA, Orr HA (2004) *Speciation* (Sinauer Assoc., Sunderland)  
443 12. Signor SA, Nuzhdin SV (2018) The evolution of gene expression in *cis* and *trans*. *Trends*  
444 *Genet* 34(7):532–544.  
445 13. Bedford T, Hartl DL (2009) Optimization of gene expression by natural selection. *Proc*  
446 *Natl Acad Sci* 106(4):1133–1138.  
447 14. Landry CR, Hartl DL, Ranz JM (2007) Genome clashes in hybrids: Insights from gene  
448 expression. *Heredity* 99(5):483–493.  
449 15. Ortíz-Barrientos D, Counterman BA, Noor MAF (2007) Gene expression divergence and  
450 the origin of hybrid dysfunctions. *Genetica* 129(1):71–81.  
451 16. Mack KL, Campbell P, Nachman MW (2016) Gene regulation and speciation in house  
452 mice. *Genome Res* 26(4):451–61.  
453 17. Cutter AD (2012) The polymorphic prelude to Bateson – Dobzhansky – Muller  
454 incompatibilities. *Trends Ecol Evol* 27(4):210–219.  
455 18. Kulmuni J, Westram AM (2017) Intrinsic incompatibilities evolving as a by-product of  
456 divergent ecological selection: Considering them in empirical studies on divergence with  
457 gene flow. *Mol Ecol* 26(12):3093–3103.  
458 19. Corbett-detig RB, Zhou J, Clark AG, Hartl DL, Ayroles JF (2013) Genetic  
459 incompatibilities are widespread within species. *Nature* 504(7478):135–137.  
460 20. Schumer M, Brandvain Y (2016) Determining epistatic selection in admixed populations.  
461 *Mol Ecol* 25(11):2577–91.  
462 21. Schumer M, et al. (2014) High-resolution mapping reveals hundreds of genetic  
463 incompatibilities in hybridizing fish species. *Elife* 2014(3):1–21.  
464 22. Barreto FS, Pereira RJ, Burton RS (2015) Hybrid dysfunction and physiological  
465 compensation in gene expression. *Mol Biol Evol* 32(3):613–622.



- 466 23. Renaut S, Nolte AW, Bernatchez L (2009) Gene expression divergence and hybrid  
467 misexpression between lake whitefish species pairs (*Coregonus* spp. *Salmonidae*). *Mol*  
468 *Biol Evol* 26(4):925–936.
- 469 24. Dobzhansky T (1951) *Genetics and the Origin of Species* (Columbia University Press,  
470 New York).
- 471 25. Schluter D, Conte GL (2009) Genetics and ecological speciation. *Proc Natl Acad Sci*  
472 106:9955–9962.
- 473 26. Martin CH, Wainwright PC (2013) A remarkable species flock of *Cyprinodon* pupfishes  
474 endemic to San Salvador Island, Bahamas. *Bull Peabody Museum Nat Hist* 54(2):231–  
475 241.
- 476 27. Martin CH, Wainwright PC (2013) Multiple fitness peaks on the adaptive landscape drive  
477 adaptive radiation in the wild. *Science* 339(6116):208–11.
- 478 28. St John ME, Martin CH (2019) Scale-eating specialists evolved adaptive feeding  
479 kinematics within a microendemic radiation of San Salvador Island pupfishes. bioRxiv  
480 doi.org/10.1101/648451 (24 May 2019).
- 481 29. Kimura M (1983) *The Neutral Allele Theory of Molecular Evolution* (Cambridge  
482 University Press, Cambridge).
- 483 30. Whitehead A, Crawford DL (2006) Neutral and adaptive variation in gene expression.  
484 *Proc Natl Acad Sci* 103(14):5425–5430.
- 485 31. Lencer ES, McCune AR (2018) An embryonic staging series up to hatching for  
486 *Cyprinodon variegatus*: An emerging fish model for developmental, evolutionary, and  
487 ecological research. *J Morphol* 279(11):1559–1578.
- 488 32. Coolon JD, et al. (2014) Tempo and mode of regulatory evolution in *Drosophila*.  
489 *Genome Res* 24(5):797–808.
- 490 33. McGirr JA, Martin CH (2018) Parallel evolution of gene expression between trophic  
491 specialists despite divergent genotypes and morphologies. *Evol Lett* 2(2):62–75.
- 492 34. Chen DH, Wu QW, Li XD, Wang SJ, Zhang ZM (2017) SYPL1 overexpression predicts  
493 poor prognosis of hepatocellular carcinoma and associates with epithelial-mesenchymal  
494 transition. *Oncol Rep* 38(3):1533–1542.
- 495 35. Kang P, Svoboda KKH (2005) Epithelial-mesenchymal transformation during  
496 craniofacial development. *J Dent Res*. 84(8):678-90.
- 497 36. Huang S, Zhang W, Chang X, Guo J (2019) Overlap of periodic paralysis and  
498 paramyotonia congenita caused by SCN4A gene mutations. *Channels* 13(1):110-119.
- 499 37. Otto GP, Wu MY, Kazgan N, Anderson OR, Kessin RH (2004) Dictyostelium  
500 macroautophagy mutants vary in the severity of their developmental defects. *J Biol Chem*  
501 279(15):15621–15629.
- 502 38. Stadel D, et al. (2015) TECPR2 cooperates with LC3C to regulate COPII-dependent ER  
503 export. *Mol Cell* 60(1):89–104.
- 504 39. St John ME, McGirr JA, Martin CH (2019) The behavioral origins of novelty: Did  
505 increased aggression lead to scale-eating in pupfishes? *Behav Ecol* 30(2):557–569.
- 506 40. West RJD, Kodric-Brown A (2015) Mate choice by both sexes maintains reproductive  
507 isolation in a species flock of pupfish (*Cyprinodon* spp) in the Bahamas. *Ethology*  
508 121(8):793–800.

- 509 41. Zhou X, Carbonetto P, Stephens M (2013) Polygenic modeling with bayesian sparse  
510 linear mixed models. *PLoS Genet* 9(2):e1003264.
- 511 42. Fritz DI, Johnston JM, Chishti AH (2019) MPP1/p55 gene deletion in a hemophilia A  
512 patient with ectrodactyly and severe developmental defects. *Am J Hematol* 94(1):E29-  
513 E32.
- 514 43. Svensson A, Libelius R, Tågerud S (2008) Semaphorin 6C expression in innervated and  
515 denervated skeletal muscle. *J Mol Histol* 39(1):5–13.
- 516 44. Malone JH, Michalak P (2008) Gene expression analysis of the ovary of hybrid females  
517 of *Xenopus laevis* and *X. muelleri*. *BMC Evol Biol* 8(1). doi:10.1186/1471-2148-8-82.
- 518 45. Maheshwari S, Barbash DA (2012) *Cis-by-trans* regulatory divergence causes the  
519 asymmetric lethal effects of an ancestral hybrid incompatibility gene. *PLoS Genet*  
520 8(3):e1002597.
- 521 46. Coyne JA, Orr HA (1989) Patterns of speciation in *Drosophila*. *Evolution* 43(2):362–381.
- 522 47. Turissini DA, McGirr JA, Patel SS, David JR, Matute DR (2018) The rate of evolution of  
523 postmating-prezygotic reproductive isolation in *Drosophila*. *Mol Biol Evol* 35(2):312-  
524 334.
- 525 48. Arnegard ME, et al. (2014) Genetics of ecological divergence during speciation. *Nature*  
526 511(7509):307–311.
- 527 49. McGirr JA, Martin CH (2019) Hybrid gene misregulation in multiple developing tissues  
528 within a recent adaptive radiation of *Cyprinodon* pupfishes. *PLoS One* 14(7):e0218899.
- 529 50. Martin CH (2016) Context-dependence in complex adaptive landscapes: frequency and  
530 trait-dependent selection surfaces within an adaptive radiation of Caribbean pupfishes.  
531 *Evolution* 70(6):1265-82.
- 532 51. Servedio MR, Doorn GS Van, Kopp M, Frame AM, Nosil P (2011) Magic traits in  
533 speciation: “magic” but not rare? *Trends Ecol Evol* 26(8):389–397.
- 534 52. Tulchinsky AY, Johnson NA, Watt WB, Porter AH (2014) Hybrid incompatibility arises  
535 in a sequence-based bioenergetic model of transcription factor binding. *Genetics*  
536 198(3):1155–1166.
- 537 53. Johnson NA, Porter AH (2000) Rapid speciation via parallel, directional selection on  
538 regulatory genetic pathways. *J Theor Biol* 205(4):527–542.
- 539 54. Martin CH, Feinstein LC (2014) Novel trophic niches drive variable progress towards  
540 ecological speciation within an adaptive radiation of pupfishes. *Mol Ecol* 23(7):1846–  
541 1862.
- 542 55. Larson EL, et al. (2018) The evolution of polymorphic hybrid incompatibilities in house  
543 mice. 209:845–859.
- 544 56. Reed LK, Markow TA (2004) Early events in speciation: Polymorphism for hybrid male  
545 sterility in *Drosophila*. 101(24):9009–9012.
- 546 57. Lencer ES, Warren WC, Harrison R, McCune AR. 2017. The *Cyprinodon variegatus*  
547 genome reveals gene expression changes underlying differences in skull morphology  
548 among closely related species. *BMC Genomics* 18(1):424.
- 549 58. Li H, Durbin R (2009) Fast and accurate short read alignment with Burrows-Wheeler  
550 transform. *Bioinformatics* 25(14):1754–60.
- 551 59. Dobin A, et al. (2013) STAR: ultrafast universal RNA-seq aligner. 29(1):15–21.

- 552 60. DePristo MA, et al. (2011) A framework for variation discovery and genotyping using  
553 next-generation DNA sequencing data. *Nat Genet* 43(5):491–8.
- 554 61. Van De Geijn B, Mcvicker G, Gilad Y, Pritchard JK (2015) WASP: Allele-specific  
555 software for robust molecular quantitative trait locus discovery. *Nat Methods*  
556 12(11):1061–1063.
- 557 62. Degner JF, et al. (2009) Effect of read-mapping biases on detecting allele-specific  
558 expression from RNA-sequencing data. *Bioinformatics* 25(24):3207–3212.
- 559 63. Stamatakis A (2014) RAxML version 8: a tool for phylogenetic analysis and post-  
560 analysis of large phylogenies. *Bioinformatics* 30(9):1312–1313.
- 561 64. Paradis E, Schliep K (2019) Ape 5.0: an environment for modern phylogenetics and  
562 evolutionary analyses in R. *Bioinformatics* 35(3):526–528.
- 563 65. Pavlidis P, Živković D, Stamatakis A, Alachiotis N (2013) SweeD: Likelihood-based  
564 detection of selective sweeps in thousands of genomes. *Mol Biol Evol* 30(9):2224–2234.
- 565 66. Ge SX, Jung D (2018) ShinyGO: a graphical enrichment tool for animals and plants.  
566 bioRxiv doi.org/10.1101/315150 (4 May 2018).
- 567 67. Liao Y, Smyth GK, Shi W (2014) Sequence analysis featureCounts: an efficient general  
568 purpose program for assigning sequence reads to genomic features. *Bioinformatics*  
569 30(7):923–930.
- 570 68. Love MI, Huber W, Anders S (2014) Moderated estimation of fold change and dispersion  
571 for RNA-seq data with DESeq2. *Genome Biol* 15(12):550.
- 572 69. Benjamini Y, Hochberg Y (1995) Controlling the false discovery rate: a practical and  
573 powerful approach to multiple testing. *J Royal Statistical Soc B* 57(1):289–300.
- 574 70. Mayba O, et al. (2014) MBASED: Allele-specific expression detection in cancer tissues  
575 and cell lines. *Genome Biol* 15(8):1–21.

576  
577  
578 **Fig. 1. Caribbean-wide patterns of gene expression and misregulation across sympatric and**  
579 **allopatric populations of *Cyprinodon* pupfishes.** A) Maximum likelihood tree estimated from  
580 1.7 million SNPs showing phylogenetic relationships among generalist populations and specialist  
581 species (100% bootstrap support indicated at nodes). B) Geographic distance separating  
582 populations was associated with differential gene expression levels in embryos at 2 days post  
583 fertilization (2 dpf; phylogenetic least squares  $P = 0.02$ , dotted regression line). C) In whole  
584 larvae at 8 dpf differential expression was not associated with geographic distance (PGLS;  $P =$   
585  $0.18$ ) and was higher between sympatric specialists (red) than between allopatric generalists  
586 separated by 300 and 1000 km (black). D and E) Hybrid misregulation for sympatric crosses at 8  
587 dpf than 2 dpf. Geographic distance was not associated with hybrid misregulation at either  
588 developmental stage (PGLS; 2 dpf  $P = 0.17$ ; 8 dpf  $P = 0.38$ ). Percentages in B-E were measured  
589 using Crescent Pond crosses.

590

591 **Fig. 2. Genes differentially expressed between species are misregulated in their F1 hybrids**  
592 **at 8 days post fertilization.** Genes differentially expressed between San Salvador species from  
593 Crescent Pond and Osprey Lake are shown in red for molluscivore × scale-eater crosses (A-D),

594 generalist × scale-eater crosses (E-H), and generalist × molluscivore crosses (I-L). Genes  
595 misregulated in F1 hybrids are shown in blue. In comparisons involving reciprocal crosses (D, J,  
596 and L), we only show genes misregulated in a single cross direction. A total of 716 genes  
597 (purple) were differentially expressed between species and also misregulated in their F1 hybrids.  
598 Purple Venn diagrams show overlap between lake population comparisons; 4 genes showed  
599 differential expression and misregulation in both lake comparisons.

600

601 **Fig. 3. Genes showing parallel expression divergence in specialists are misregulated in**  
602 **specialist hybrids.** Genes differentially expressed between generalists and molluscivores (green)  
603 were compared to the set of genes differentially expressed between generalists and scale-eaters  
604 (dark blue). A-D) Significantly more genes showed differential expression in both specialist  
605 comparisons (light blue) than expected by chance in both lakes at both developmental stages  
606 (Fisher's exact test,  $P < 2.7 \times 10^{-5}$ ). E) A neutral model of gene expression evolution would  
607 predict that only 50% of genes should show the same direction of expression in specialists  
608 relative to generalists (yellow). F) Instead, 96.6% of genes showed the same direction of  
609 expression in specialists, suggesting significant parallel expression divergence in specialists  
610 (Binomial exact test;  $P < 1.0 \times 10^{-16}$ ). Consistent with incompatible regulatory mechanisms  
611 underlying parallel expression in specialists, 45 of these genes were misregulated in specialist F1  
612 hybrids, including G) *sypl1* and H) *scn4a* which showed extreme misregulation: expression  
613 levels outside the range of all other Caribbean populations examined.

614

615 **Fig. 4. Ecological divergence causes hybrid gene misregulation.** A) 14 selected gene ontology  
616 (GO) terms relevant to trophic specialization were significantly enriched for the set of 125 genes  
617 in highly differentiated genomic regions that showed differential expression between species and  
618 misregulation in F1 hybrids. Consistent with muscle development and nitrogen metabolism  
619 enrichment, B) adductor mandibulae muscle mass tends to be larger in specialists and C) stable  
620 nitrogen isotope ratios ( $\delta^{15}\text{N}$ ) are significantly higher in scale-eaters, indicating that they occupy  
621 a higher trophic level (Tukey post-hoc test:  $P < 0.001^{***}$ ). D) The gene *mpp1* is controlled by  
622 *cis*-regulatory divergence as shown by E) allele specific expression in F1 hybrids and F)  
623 differential expression between Crescent Pond generalists vs. scale-eaters and misregulation in  
624 their F1 hybrids. G) The gene *mpp1* (light blue band) is near 170 SNPs fixed between Crescent  
625 Pond generalists vs. scale-eaters (black points), shows high absolute divergence between species  
626 ( $D_{xy}$ ), low within-species diversity ( $\pi$ ), signatures of a hard selective sweep (Tajima's D and  
627 SweeD composite likelihood ratio (CLR)), and is significantly associated with oral jaw length  
628 (PIP; GEMMA genome-wide association mapping).

**Fig 1.**

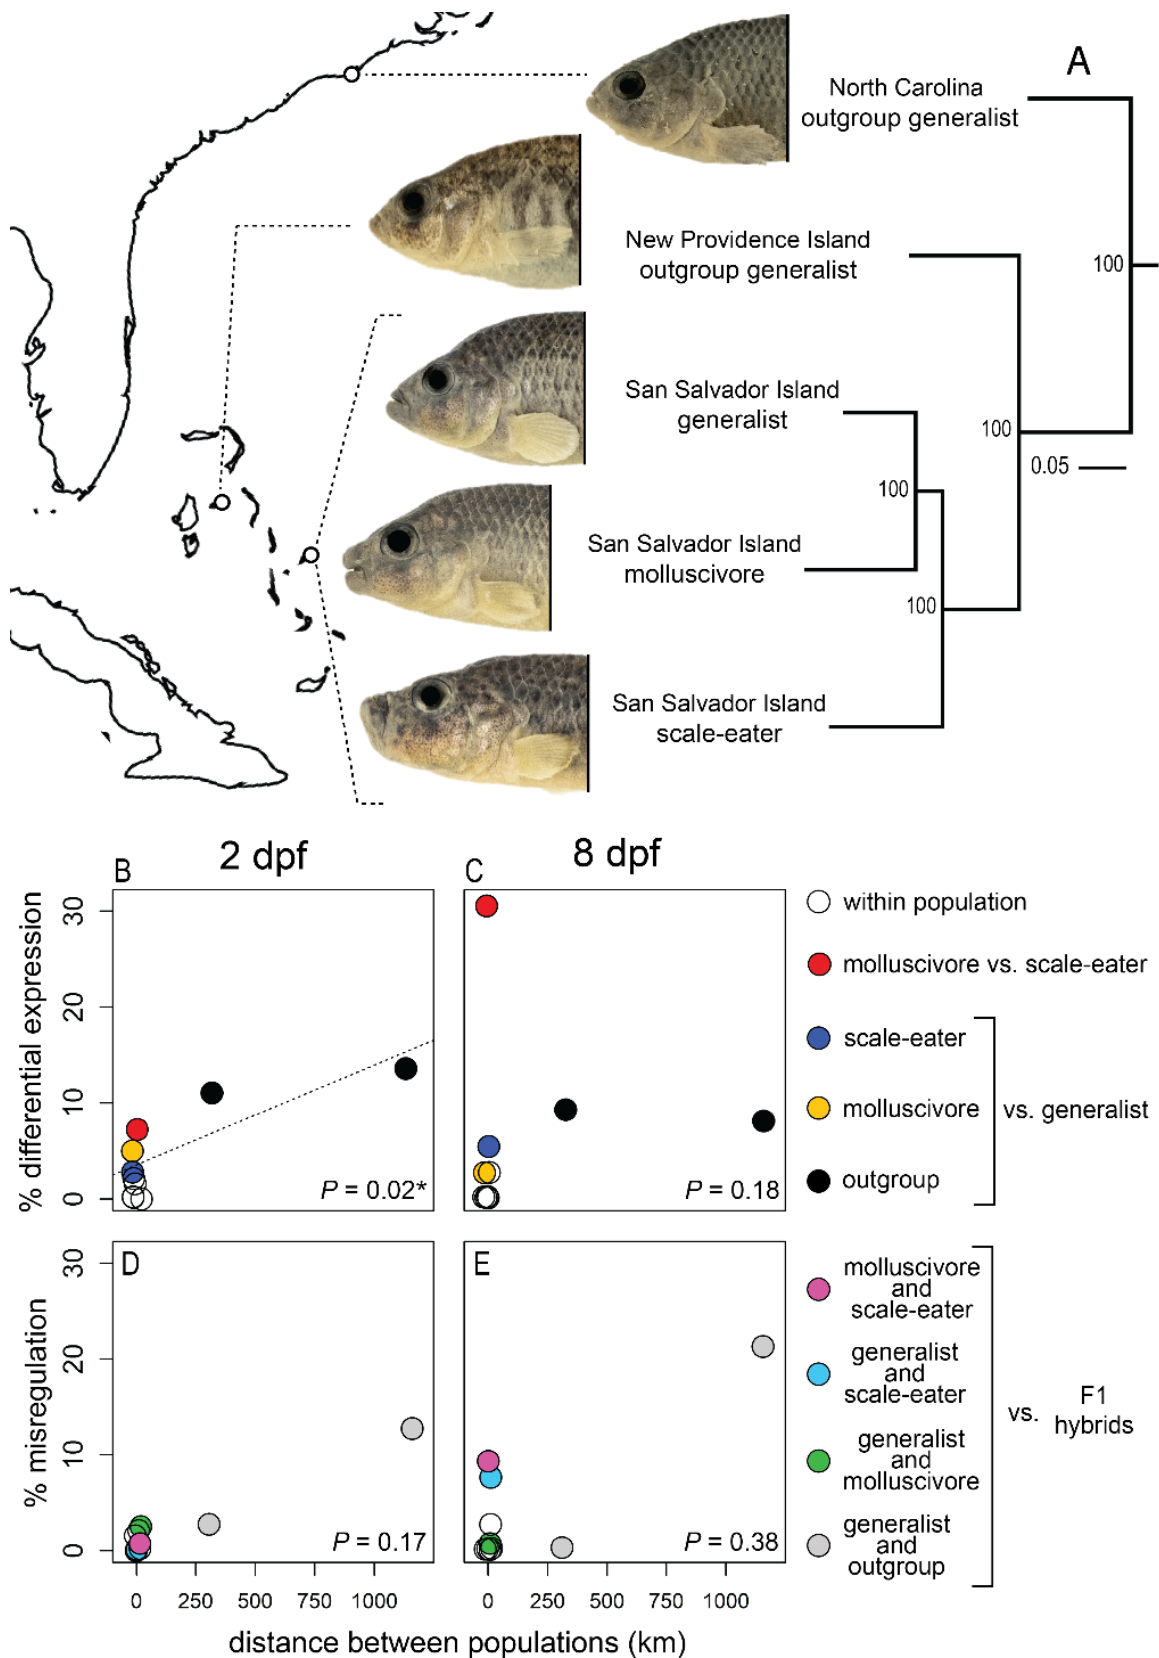



**Fig. 2.**

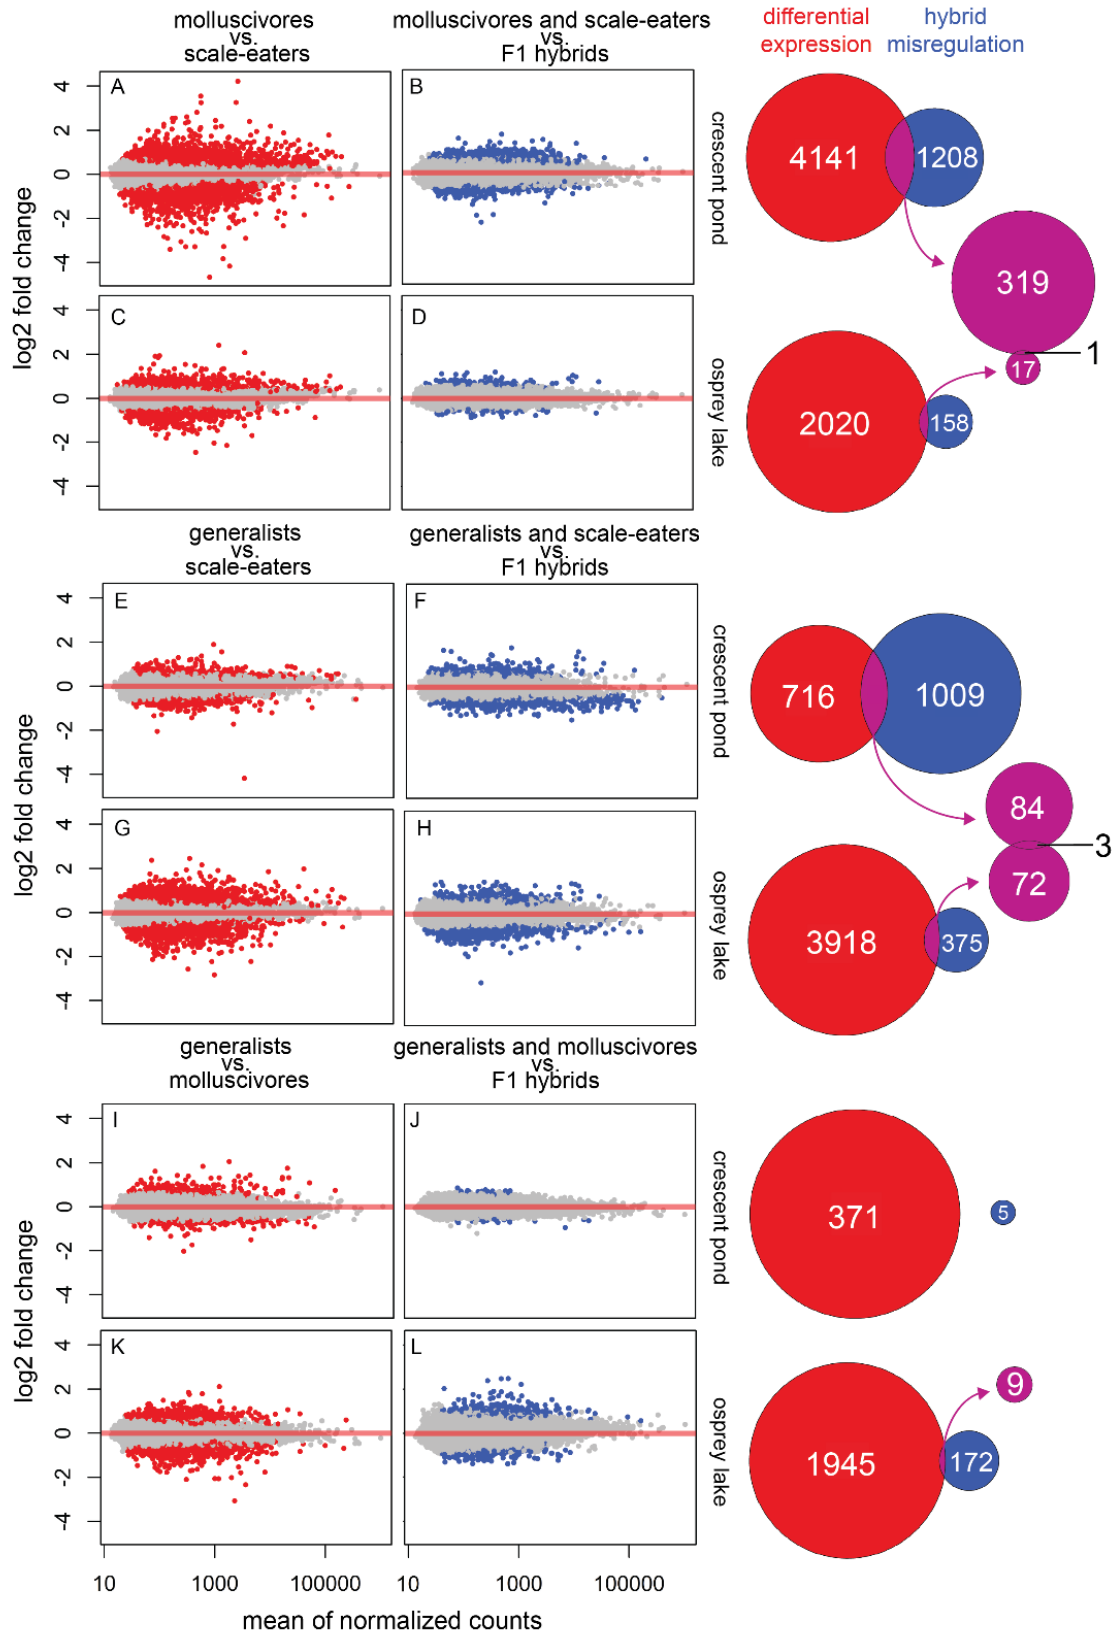

**Fig. 3.**

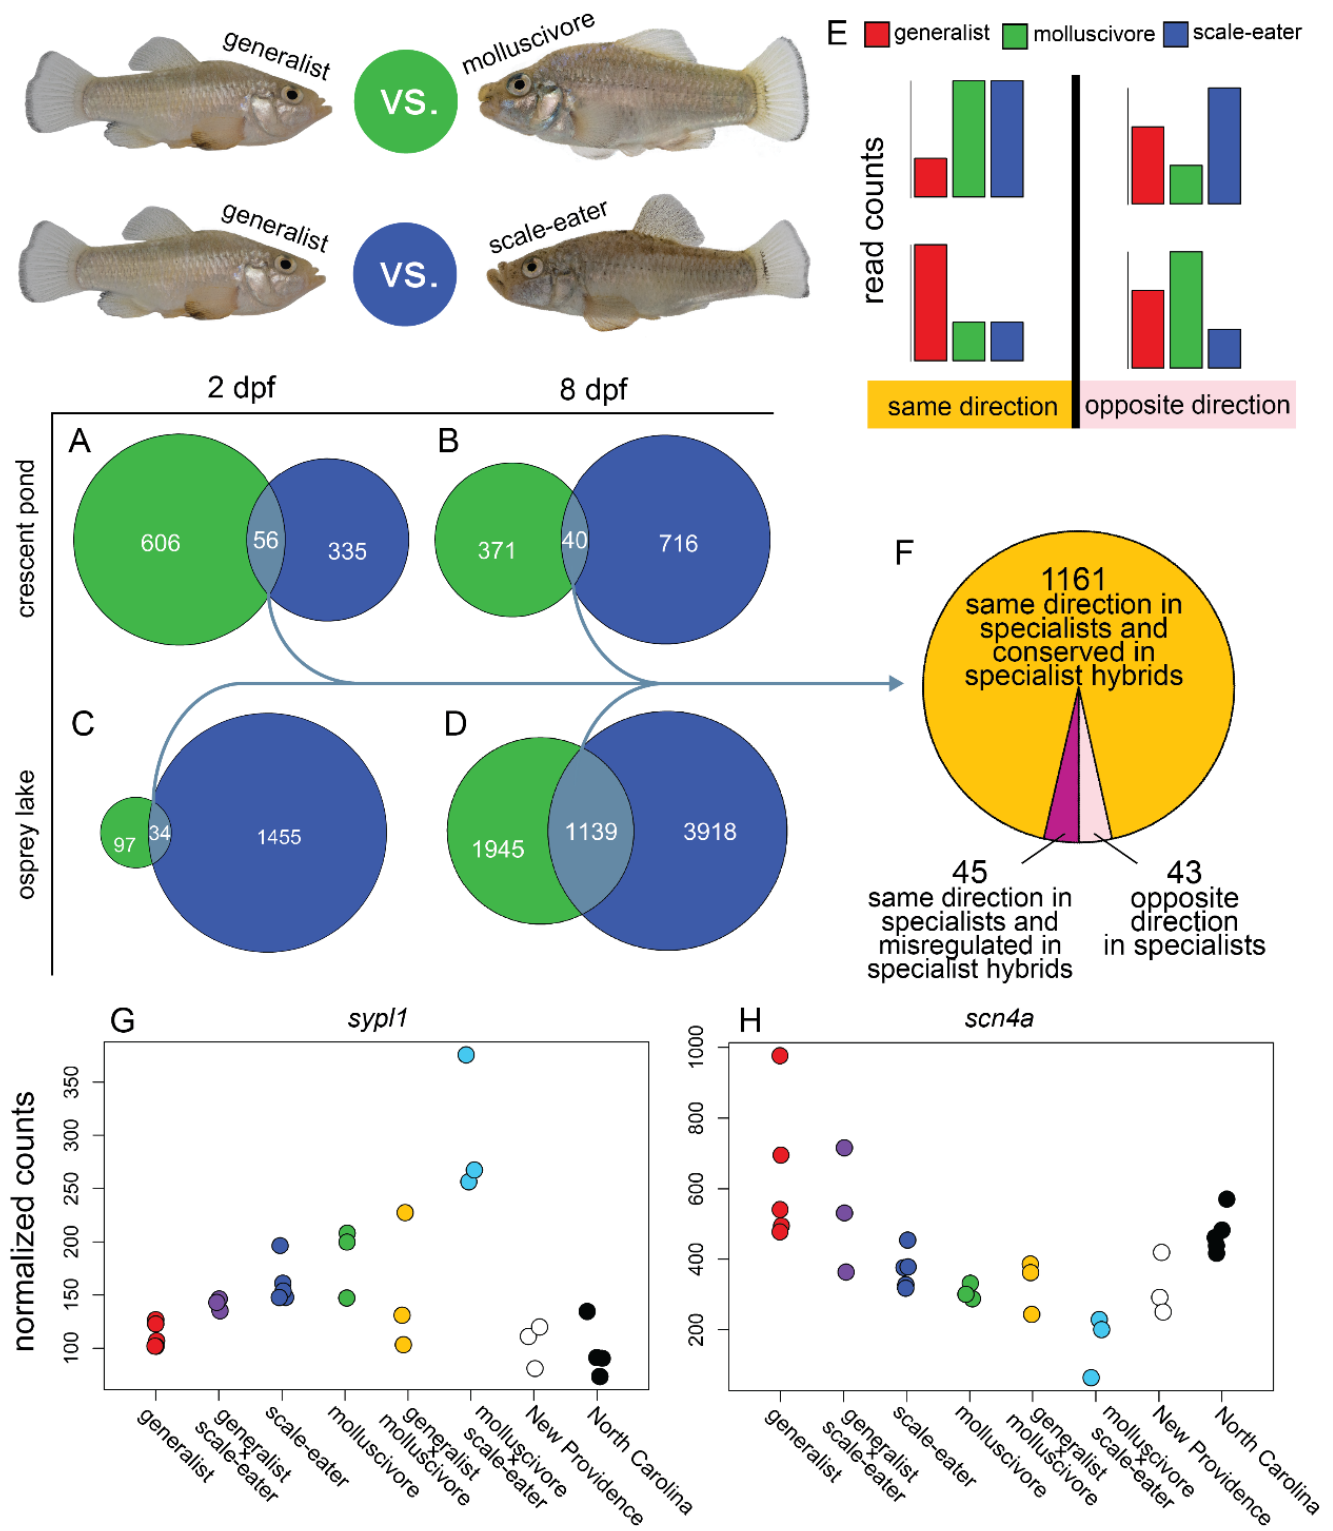

**Fig. 4.**

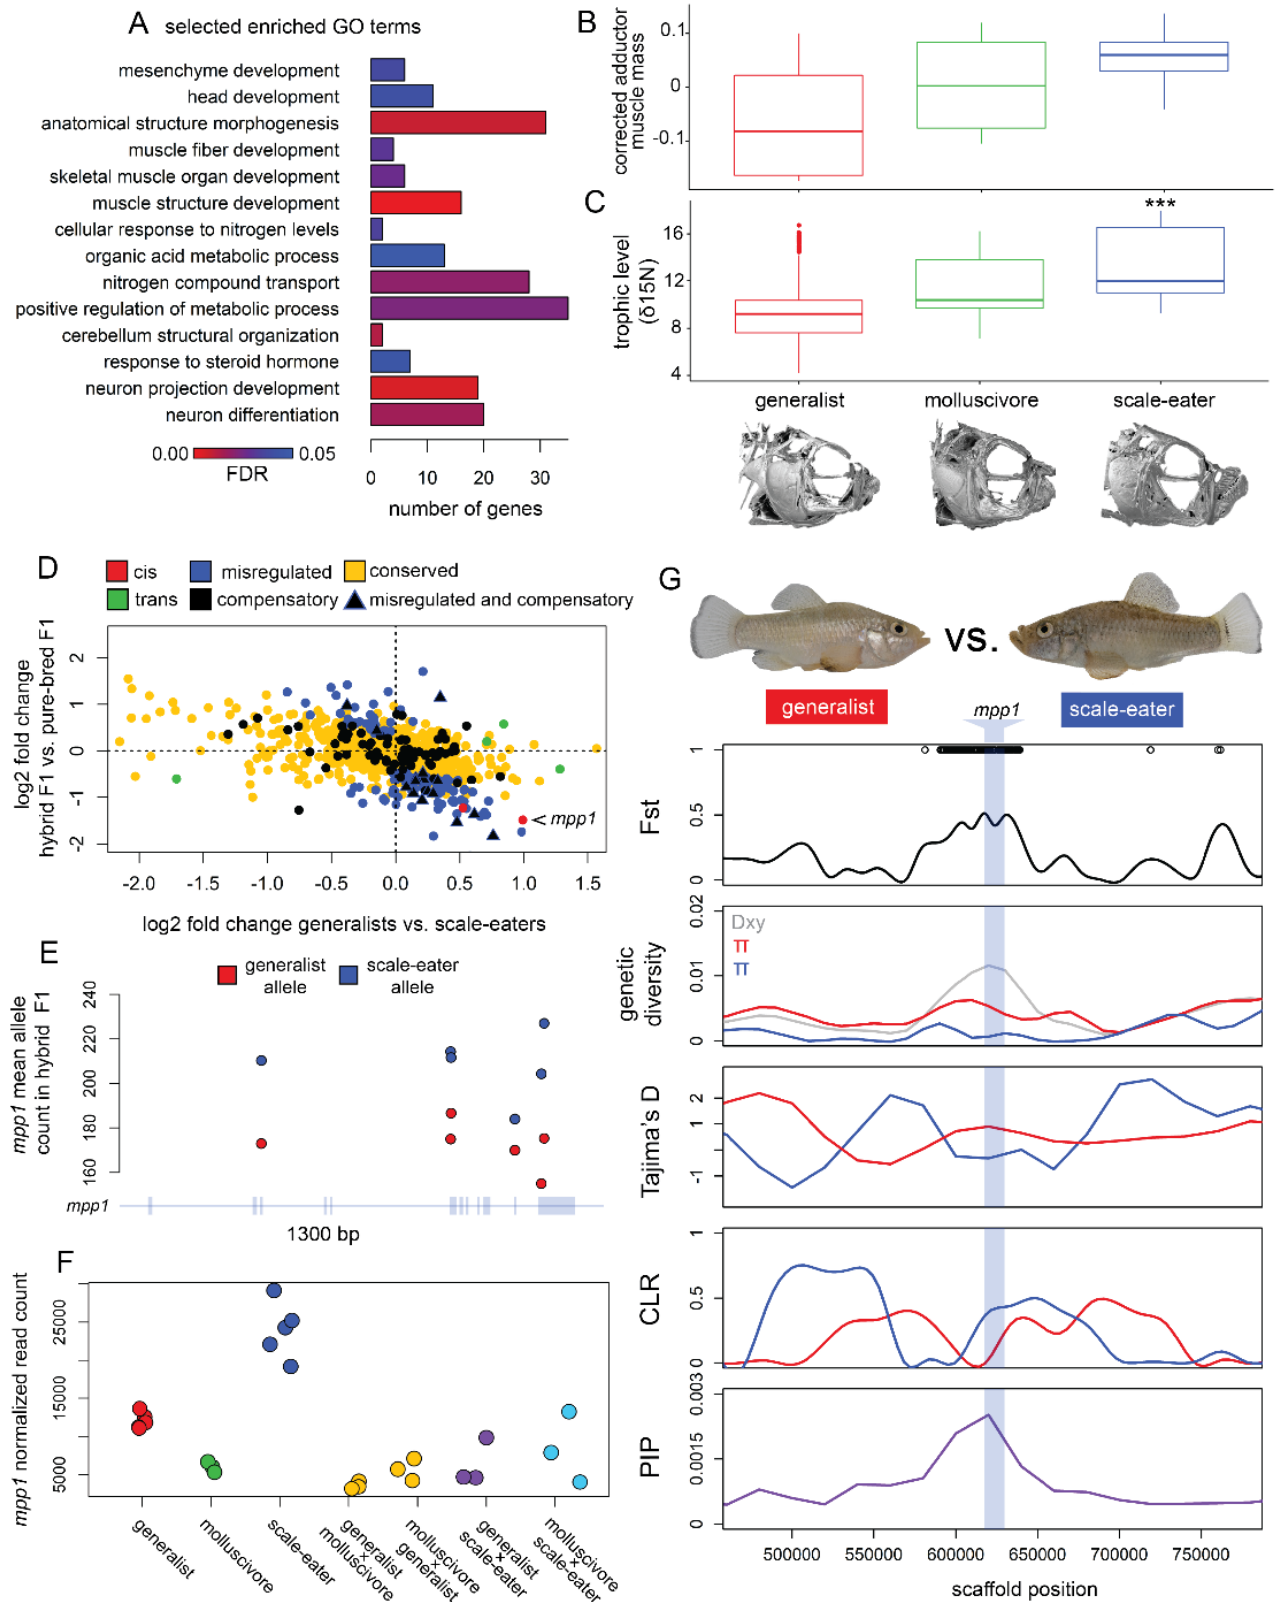



## 629 **Supplemental Methods**

### 630 ***Study system and sample collection***

631 We collected 51 wild-caught individuals from nine isolated hypersaline lakes on San Salvador  
632 Island, Bahamas (Great Lake, Stout's Lake, Oyster Lake, Little Lake, Crescent Pond, Moon  
633 Rock, Mermaid's Pond, Osprey Lake, Pigeon Creek) between 2011 and 2018 using seine-nets  
634 and hand nets. 18 scale-eaters (*Cyprinodon desquamator*) were sampled from six lake  
635 populations; 15 molluscivores (*C. brontotheroides*) were sampled from four populations; and 18  
636 generalists (*C. variegatus*) were sampled from nine populations. The genomic dataset also  
637 included two *C. laciniatus* from Lake Cunningham, New Providence Island, Bahamas, one *C.*  
638 *bondi* from Etang Saumautre lake in the Dominican Republic, one *C. variegatus* from Fort  
639 Fisher, North Carolina, one *C. diabolis* from Devils Hole, Nevada, and captive-bred individuals  
640 of *C. simus* and *C. maya* from Laguna Chicancanab, Quintana Roo, Mexico. Sampling is further  
641 described in (1, 2). Fish were euthanized in an overdose of buffered MS-222 (Finquel, Inc.)  
642 following approved protocols from the University of California, Davis Institutional Animal Care  
643 and Use Committee (#17455), the University of California, Berkeley Animal Care and Use  
644 Committee (AUP-2015-01-7053), and the University of North Carolina Institutional Animal  
645 Care and Use Committee (18-061.0). Samples were stored in 95-100% ethanol.

646 Our total mRNA transcriptomic dataset consisted of 124 *Cyprinodon* exomes from  
647 embryos collected between 2017 and 2018. We collected fishes for breeding from two  
648 hypersaline lakes on San Salvador Island, Bahamas (Osprey Lake, and Crescent Pond), Lake  
649 Cunningham, New Providence Island, Bahamas, and Fort Fisher, North Carolina, United States..  
650 Wild-caught parents were reared in breeding tanks at 25–27°C, 10–15 ppt salinity, pH 8.3, and  
651 fed a mix of commercial pellet foods and frozen foods. All purebred F1 offspring were collected  
652 from breeding tanks containing multiple F0 breeding pairs. All F1 offspring from crosses  
653 between species and populations were collected from individual F0 breeding pairs that were  
654 subsequently sequenced in our genomic dataset.

655 Methods for collecting and raising embryos were similar to previously outlined methods  
656 (3, 4). All F1 embryos were collected from breeding mops within one hour of spawning and  
657 transferred to petri dishes incubated at 27°C. Embryo water was treated with Fungus Cure (API  
658 Inc.) and changed every 48 hours. Embryos were inspected for viability and sampled either 47-

659 49 hours post fertilization (hereafter 2 days post fertilization (2 dpf)) or 190-194 hours (eight  
660 days) post fertilization (hereafter 8 dpf). These early developmental stages are described as stage  
661 23 (2 dpf) and 34 (8 dpf) in a recent embryonic staging series of *C. variegatus* (5). The 2 dpf  
662 stage is comparable to the Early Pharyngula Period of zebrafish, when multipotent neural crest  
663 cells have begun migrating to pharyngeal arches that will form the oral jaws and most other  
664 craniofacial structures (6–8). Embryos usually hatch six to ten days post fertilization, with  
665 similar variation in hatch times among species (3, 7). While some cranial elements are ossified  
666 prior to hatching, the skull is largely cartilaginous at 8 dpf (5). Embryos from each stage were  
667 euthanized in an overdose of buffered MS-222 and immediately preserved in RNA later  
668 (Ambion, Inc.) for 24 hours at 4°C and then - 20°C for up to 9 months following manufacturer’s  
669 instructions.

670

### 671 *Hybrid cross design*

672 All parents used to generate F1 hybrids were collected from four locations: 1) Crescent Pond,  
673 San Salvador, 2) Osprey Lake, San Salvador, 3) Lake Cunningham, New Providence Island, or  
674 4) Fort Fisher, North Carolina. In order to understand how varying levels of genetic divergence  
675 and ecological divergence between parents affected gene expression patterns in F1 offspring, we  
676 performed 11 separate crosses falling into three categories. 1) For purebred crosses, we collected  
677 F1 embryos from breeding tanks containing multiple breeding pairs from a single location. 2) For  
678 San Salvador species crosses, we crossed a single individual of one species with a single  
679 individual of another species from the same lake for all combinations of the three San Salvador  
680 species. In order to control for maternal effects on gene expression inheritance, we collected  
681 samples from reciprocal crosses for three San Salvador species crosses. 3) For outgroup  
682 generalist crosses, we bred a Crescent Pond generalist male with a Lake Cunningham female and  
683 a North Carolina female (Table S9).

684

### 685 *Genomic sequencing and alignment*

686 All DNA samples were extracted from muscle tissue or caudal fin clips using DNeasy Blood and  
687 Tissue kits (Qiagen, Inc.) and quantified on a Qubit 3.0 fluorometer (ThermoFisher Scientific,

688 Inc.). Sequencing methods for 43 of the 58 individuals in our genomic dataset were previously  
689 described (1, 2). Briefly, libraries were prepared using Illumina TruSeq DNA PCR-Free kits at  
690 the Vincent J. Coates Genomic Sequencing Center (QB3, Berkeley, CA) and samples were  
691 pooled on four lanes of Illumina 150PE Hiseq4000. We added 15 new individuals to this dataset  
692 that were crossed to generate F1 hybrids. These libraries were prepared at the same facility using  
693 TruSeq kits on the automated Apollo 324 system (WaferGen BioSystems, Inc.). Samples were  
694 fragmented using Covaris sonication, barcoded with Illumina indices, quality checked using a  
695 Fragment Analyzer (Advanced Analytical Technologies, Inc.), and sequenced on one lane of  
696 Illumina 150PE Hiseq4000 in June 2018.

697 We filtered raw reads using Trim Galore (v. 4.4, Babraham Bioinformatics) to remove  
698 Illumina adaptors and low-quality reads (mean Phred score < 20) and mapped 1,953,034,511  
699 reads to the *Cyprinodon* reference genome (NCBI, *Cyprinodon variegatus* annotation release  
700 100; total sequence length = 1,035,184,475; number of scaffolds = 9,259; scaffold N50 =  
701 835,301; contig N50 = 20,803; (7)) with the Burrows-Wheeler Alignment Tool (bwa mem; (9)  
702 (v. 0.7.12)). The Picard software package (v. 2.0.1) and Samtools (v. 1.9) were used to remove  
703 duplicate reads (MarkDuplicates) and create indexes. We assessed mapping and read quality  
704 using MultiQC (10).

705

### 706 ***Transcriptomic sequencing and alignment***

707 We extracted RNA from a total of 348 individuals (whole-embryos and whole-larvae) using  
708 RNeasy Mini Kits (Qiagen catalog #74104). For samples collected at 2 dpf, we pooled 5  
709 embryos together and pulverized them in a 1.5 ml Eppendorf tube using a plastic pestle washed  
710 with RNase Away (Molecular BioProducts). We used the same extraction method for samples  
711 collected at 8 dpf but did not pool larvae and prepared a library for each individual separately.  
712 Total mRNA sequencing libraries for the resulting 125 samples were prepared at the Vincent J.  
713 Coates Genomic Sequencing Center (QB3, Berkeley, CA) using the Illumina stranded Truseq  
714 RNA kit (Illumina RS-122-2001). Sequencing was performed on Illumina Hiseq4000 150PE. 72  
715 and 53 total mRNA libraries were each pooled across three lanes and sequenced in May 2018  
716 and July 2018, respectively.

717 We filtered raw reads using Trim Galore (v. 4.4, Babraham Bioinformatics) to remove  
718 Illumina adaptors and low-quality reads (mean Phred score < 20) and mapped 1,638,067,612  
719 filtered reads to the *Cyprinodon* reference genome (NCBI, *Cyprinodon variegatus* annotation  
720 release 100; 1.035 Gb; scaffold N50 = 835,301; (7)) using the RNA-seq aligner STAR with  
721 default parameters (v. 2.5 (11)). We assessed mapping and read quality using MultiQC (10). We  
722 quantified the number of duplicate reads produced during sequence amplification and GC  
723 content of transcripts for each sample using RSeQC (12). We also used RSeQC to estimate  
724 transcript integrity numbers (TINs) which is a measure of potential *in vitro* RNA degradation  
725 within a sample. TIN is calculated by directly analyzing the uniformity of read coverage across a  
726 transcript and is a more reliable measure of degradation compared to RNA integrity number  
727 (RIN) which uses ribosomal RNA as a proxy for overall RNA integrity (12, 13). We performed  
728 one-way ANOVA to determine whether the GC content of reads, read depth across features, total  
729 normalized counts, or TINs differed between samples grouped by species and population. We  
730 did not find a difference between species or generalist populations for any quality control  
731 measure (Fig. S7; ANOVA,  $P > 0.1$ ), except for a marginal difference in TIN (Fig. S8; ANOVA,  
732  $P = 0.041$ ) driven by slightly higher transcript quality in North Carolina samples (Tukey multiple  
733 comparisons of means;  $P = 0.043$ ). We found no significant differences among San Salvador  
734 Island generalists, molluscivores, scale-eaters, and outgroup generalists in the proportion of reads  
735 that map to annotated features of the *Cyprinodon* reference genome (Fig. S9; ANOVA,  $P =$   
736  $0.17$ ). We did find that more reads mapped to features in 2 dpf samples than 8 dpf samples (Fig.  
737 S13; Student's *t*-test,  $P < 2.2 \times 10^{-16}$ ).

738

### 739 ***Variant discovery and population genetic analyses***

740 We followed the best practices guide recommended by the Genome Analysis Toolkit (v. 3.5  
741 (14)) in order to call and refine SNP variants across 58 *Cyprinodon* genomes and across 124  
742 *Cyprinodon* exomes using the Haplotype Caller function. For both datasets, we used  
743 conservative hard filtering criteria to call SNPs (14, 15): Phred-scaled variant confidence divided  
744 by the depth of nonreference samples > 2.0, Phred-scaled *P*-value using Fisher's exact test to  
745 detect strand bias > 60, Mann–Whitney rank-sum test for mapping qualities ( $z > 12.5$ ), Mann–  
746 Whitney rank-sum test for distance from the end of a read for those with the alternate allele

747 ( $z > 8.0$ ). We filtered both SNP datasets to include individuals with a genotyping rate above 90%  
748 and SNPs with minor allele frequencies higher than 5%. Our final filtered genomic SNP dataset  
749 included 13,838,603 variants with a mean sequencing coverage of  $8.2\times$  per individual.

750 We further refined our transcriptomic SNP dataset using the allele-specific  
751 software WASP (v. 0.3.3) to correct for potential mapping biases that would influence tests of  
752 allele-specific expression (ASE; (16, 17)). While we showed that mapping bias does not  
753 significantly affect the proportion of reads mapped to features between species (Fig. S9), even a  
754 small number of biased sites would likely account for the majority of significant ASE at an  
755 exome-wide scale. WASP identified reads that overlapped sites in our original transcriptomic  
756 SNP dataset and re-mapped those reads after swapping the genotype for the alternate allele.  
757 Reads that failed to map to exactly the same location were discarded. We re-mapped unbiased  
758 reads using methods outlined above to create our final BAM files that were used for all  
759 downstream analyses. We re-called SNPs using unbiased BAMs for a final transcriptomic SNP  
760 dataset that included 413,055 variants with a mean coverage of  $1,060\times$  across gene features per  
761 individual.

762 We analyzed genomic SNPs to measure within-population diversity ( $\pi$ ), between-  
763 population diversity ( $D_{xy}$ ), relative genetic diversity ( $F_{st}$ ), and Tajima's D. We measured  $\pi$ ,  $D_{xy}$ ,  
764 and  $F_{st}$  in 20 kb windows using the python script popGenWindows.py created by Simon Martin  
765 (available on [https://github.com/simonhmartin/genomics\\_general](https://github.com/simonhmartin/genomics_general); (18)). 13.8 million SNP  
766 variants genotyped by whole genome resequencing of 58 *Cyprinodon* individuals revealed more  
767 population structure between allopatric generalists than between generalists and specialists on  
768 San Salvador (genome-wide mean  $F_{st}$  between San Salvador generalists: vs. North Carolina =  
769 0.217; vs. New Providence = 0.155; vs. scale-eaters = 0.106; vs. molluscivores = 0.056). We  
770 found consistent relationships across a maximum likelihood phylogeny calculated with RAxML,  
771 with longer branch lengths separating allopatric populations (Fig. 1, S1).

772 We calculated Tajima's D in 20 kb windows and per site  $F_{st}$  for each species and lake  
773 population genomic using VCFtools (v. 1.15). We chose to analyze 20 kb windows given  
774 previous estimates of pairwise linkage disequilibrium (measured as  $r^2$ ) showing that linkage  
775 dropped to background levels between SNPs separated by  $>20$  kb ( $r^2 < 0.1$ ; (1)). Tajima's D  
776 statistic compares observed nucleotide diversity to diversity under a null model assuming genetic

777 drift, where negative values indicate a reduction in diversity across segregating sites that may be  
778 due to positive selection (19). We also looked for evidence of hard selective sweeps using the  
779 SweepFinder method first developed by Nielsen et al. (2005) and implemented in the software  
780 package SweeD (20, 21). SweeD separates scaffolds into 1000 windows of equal size and  
781 calculates a composite likelihood ratio (CLR) from a comparison of two contrasting models for  
782 each window. The first assumes a window has undergone a recent selective sweep, whereas the  
783 second assumes a null model where the site frequency spectrum of the window does not differ  
784 from that of the entire scaffold. Windows with a high CLR suggest a history of selective sweeps  
785 because the site frequency spectrum is shifted toward low-frequency and high-frequency derived  
786 variants (20, 21).

787 We used ancestral population sizes (previously determined by the Multiple Sequentially  
788 Markovian Coalescent approach (1, 22) to estimate the expected neutral SFS with SweeD,  
789 accounting for historical demographic effects on the contemporary shape of the SFS. SweeD  
790 identifies regions of a scaffold showing signs of a hard sweep relative to the rest of that scaffold.  
791 Thus, we normalized CLR values to be between zero and one to compare the strength of  
792 selection across scaffolds. We defined regions showing strong signs of a hard selective sweep as  
793 windows that showed CLR values above the 90<sup>th</sup> percentile for a scaffold (normalized CLR > 0.9) and  
794 a negative value of Tajima's D less than the genome-wide 10<sup>th</sup> percentile (range = -1.62 – -0.77  
795 (see table S7 for all population thresholds)). We also visually inspected regions near candidate  
796 incompatibility genes to identify CLR values and Tajima's D estimates indicating moderate signs of  
797 selection.

798

### 799 ***Read count abundance and differential expression analyses***

800 We used the featureCounts function of the Rsubread package (23) requiring paired-end and  
801 reverse stranded options to generate read counts across 36,511 previously annotated features for  
802 the *Cyprinodon* reference genome (7). We aggregated read counts at the transcript isoform level  
803 (36,511 isoforms correspond to 24,952 protein coding genes).

804 We used DESeq2 (v. 3.5 (24)) to normalize raw read counts and perform principal  
805 component analyses. DESeq2 normalizes read counts by calculating a geometric mean of counts



806 for each gene across samples, dividing individual gene counts by this mean, and then using the  
807 median of these ratios as a size factor for each sample. These sample-specific size factors  
808 account for differences in library size and sequencing depth among samples. Gene features  
809 showing less than 10 normalized counts in every sample were discarded from analyses. We  
810 constructed a DESeqDataSet object in R using a multi-factor design that accounted for variance  
811 in F1 read counts influenced by parental population origin and sequencing date (design =  
812 ~sequencing\_date + parental\_breeding\_pair\_populations). Next, we used a variance stabilizing  
813 transformation on normalized counts and performed a principal component analysis to visualize  
814 the major axes of variation in 2 dpf and 8 dpf samples (Fig. S15). We removed one 8 dpf outlier  
815 so that the final count matrix used for differential expression analyses included 124 samples (2  
816 dpf = 68, 8 dpf = 56).

817 DESeq2 fits negative binomial generalized linear models for each gene across samples to  
818 test the null hypothesis that the fold change in gene expression between two groups is zero. The  
819 program uses an empirical Bayes shrinkage method to determine gene dispersion parameters,  
820 which model within-group variability in gene expression and logarithmic fold changes in gene  
821 expression. Significant differential expression between groups was determined with Wald tests  
822 by comparing normalized posterior log fold change estimates and correcting for multiple testing  
823 using the Benjamini–Hochberg procedure with a false discovery rate of 0.05 (Benjamini and  
824 Hochberg 1995). We contrasted gene expression in pairwise comparisons between populations  
825 grouped by developmental stage. To determine within population levels of expression divergence  
826 (Fig. 1B-E), we down-sampled each population to perform every pairwise comparison between  
827 samples using the highest sample size possible between groups and calculated the mean number  
828 of genes differentially expressed across comparisons.

829

### 830 *Hybrid misregulation and inheritance of gene expression patterns*

831 We generated F1 hybrid offspring from crosses between populations and generated purebred F1  
832 offspring from crosses within populations. We compared expression in hybrids to expression in  
833 purebred offspring to determine whether genes showed additive, dominant, or transgressive  
834 patterns of inheritance in hybrids. To categorize hybrid inheritance for F1 offspring generated

835 from a cross between a female from population A and a male from population B ( $F1_{(A \times B)}$ ), we  
836 conducted four pairwise differential expression tests with DESeq2:

837 1)  $F1_{(A)}$  vs.  $F1_{(B)}$

838 2)  $F1_{(A)}$  vs.  $F1_{(A \times B)}$

839 3)  $F1_{(B)}$  vs.  $F1_{(A \times B)}$

840 4)  $F1_{(A)} + F1_{(B)}$  vs.  $F1_{(A \times B)}$

841 Hybrid inheritance was considered additive if hybrid gene expression was intermediate  
842 between parental populations and significantly different between parental populations.

843 Inheritance was dominant if hybrid expression was significantly different from one parental  
844 population but not the other. Genes showing misregulation in hybrids showed transgressive  
845 inheritance, meaning hybrid gene expression was significantly higher (overdominant) or lower  
846 (underdominant) than both parental species (Fig. S10-12). All comparisons were conducted  
847 between groups sampled at the same developmental stage (2 dpf or 8 dpf).

848

#### 849 ***Parallel changes in gene expression in specialists***

850 Parallel evolution of gene expression is often associated with convergent niche specialization,  
851 but parallel changes in expression may also underlie divergent specialization (4). We looked at  
852 the intersection of genes differentially expressed between generalists versus molluscivores and  
853 generalists versus scale-eaters to determine whether specialists showed parallel changes in  
854 expression relative to generalists. We compared expression between generalists and each  
855 specialist grouping samples by lake population and developmental stage.

856 We also examined the direction of expression divergence for each gene to evaluate the  
857 significance of parallel expression evolution (Fig 3E). Specifically, we wanted to know whether  
858 the fold change in expression for genes tended to show the same sign in both specialists relative  
859 to generalists (either up-regulated in both specialists relative to generalists or down-regulated in  
860 both specialists). Under a neutral model of gene expression evolution, half of the genes  
861 differentially expressed between generalists versus molluscivores and generalists versus scale-  
862 eaters would show fold changes in the same direction and half would show fold changes in



863 opposite directions (Fig. 3E). Remarkably, 1,206 (96.6%) of the genes showing expression  
864 divergence between generalists versus molluscivores and generalists versus scale-eaters showed  
865 the same direction of expression divergence in specialists. These results provide robust evidence  
866 for parallel changes in expression underlying divergent trophic adaptation and support previous  
867 findings based on a smaller sample size (3).

868 We wanted to determine whether significant parallelism at the level of gene expression in  
869 specialists was mirrored by parallel regulatory mechanisms. We predicted that genes showing  
870 parallel changes in specialists would show conserved expression levels in specialist hybrids if  
871 they were controlled by the same (or compatible) regulatory mechanisms, but would be  
872 misregulated in specialist hybrids if expression was controlled by different and incompatible  
873 regulatory mechanisms. We identified genes showing conserved levels of expression in specialist  
874 hybrids (no significant difference in expression between purebred specialist F1s and specialist  
875 hybrid F1s) and genes showing misregulation in specialist hybrids. We also identified genes  
876 showing extreme Caribbean-wide misregulation in specialists. These genes were differentially  
877 expressed in specialist hybrids relative to all other samples in our dataset from across the  
878 Caribbean (North Carolina to New Providence Island, Bahamas).

879

### 880 *Allele specific expression and mechanisms of regulatory divergence*

881 We partitioned hybrid gene expression divergence into patterns that could be attributed to *cis*-  
882 regulatory variation in cases where linked genetic variation affected proximal gene expression  
883 levels, and *trans*-regulatory variation in cases where genetic variation in unlinked factors bound  
884 to *cis*-regulatory elements affected gene expression levels. It is possible to identify mechanisms  
885 of gene expression divergence between parental species by bringing *cis* elements from both  
886 parents together in the same *trans* environment in F1 hybrids and quantifying allele specific  
887 expression (ASE) of parental alleles at heterozygous sites (25, 26). A gene showing ASE in F1  
888 hybrids that is differentially expressed between parental species is expected to result from *cis*-  
889 regulatory divergence. *Trans*-regulatory divergence can be determined by comparing the ratio of  
890 gene expression in parents with the ratio of allelic expression in F1 hybrids. *Cis* and *trans*  
891 regulatory variants often interact to affect expression divergence of the same gene (26–28).

892 Our genomic variant dataset included every parent used to generate F1 hybrids between  
893 populations ( $n = 15$ ). We used the VariantsToTable function of the Genome Analysis Toolkit  
894 (14) to output genotypes across 13.8 million variant sites for each parent and overlapped these  
895 sites with the 413,055 variant sites identified across F1 transcriptomes (corrected for mapping  
896 bias). To categorize mechanisms of regulatory divergence between two populations, we used  
897 custom R and python scripts (<https://github.com/joemcgirr/fishfASE>) to identify SNPs that were  
898 alternatively homozygous in breeding pairs and heterozygous in their F1 offspring. We counted  
899 reads across heterozygous sites using ASEReadCounter (-minDepth 20 --minMappingQuality 10  
900 --minBaseQuality 20 -drf DuplicateRead) and matched read counts to maternal and paternal  
901 alleles. We calculated the significance of ASE per gene transcript. We identified significant ASE  
902 using a beta-binomial test comparing the maternal and paternal counts at each transcript with the  
903 R package MBASED (29). For each F1 hybrid sample, we performed a 1-sample analysis with  
904 MBASED using default parameters run for 1,000,000 simulations to identify transcripts showing  
905 significant ASE ( $P < 0.05$ ). Finally, we quantified allele counts across all heterozygous sites for  
906 each purebred F1 sample and ran the same analyses in MBASED to identify transcripts showing  
907 ASE in parental populations. A transcript was considered to show ASE if it showed significant  
908 ASE in all F1 hybrid samples generated from the same breeding pair and did not show  
909 significant ASE in purebred F1 offspring generated from the same parental populations.

910 In order to determine regulatory mechanisms controlling expression divergence between  
911 parental species, a transcript had to be included in differential expression analyses and ASE  
912 analyses. We were able to classify regulatory categories for more transcripts if breeding pairs  
913 were more genetically divergent because we could analyze more heterozygous sites in their  
914 hybrids (mean number of informative transcripts across crosses = 1,914; range = 812 – 3,543).  
915 For each hybrid sample and each transcript amenable to both types of analyses, we calculated H  
916 – the ratio of maternal allele counts compared to the number of paternal allele counts in F1  
917 hybrids, and P – the ratio of normalized read counts in purebred F1 offspring from the maternal  
918 population compared to read counts in purebred F1 offspring from the paternal population. We  
919 performed a Fisher’s exact test using H and P to determine whether there was a significant *trans*-  
920 contribution to expression divergence, testing the null hypothesis that the ratio of read counts in  
921 the parental populations was equal to the ratio of parental allele counts in hybrids (26, 28, 30,  
922 31).

923 We classified expression divergence due to *cis*-regulation if a transcript showed  
924 significant ASE, significant differential expression between parental populations of purebred F1  
925 offspring, and no significant *trans*- contribution. We identified expression divergence due to  
926 *trans*-regulation if transcripts did not show ASE, were differentially expressed between parental  
927 populations of purebred F1 offspring, and showed significant *trans*- contribution. We found  
928 compensatory regulatory divergence (*cis*- and *trans*-regulatory factors had opposing effects on  
929 expression) in cases where a transcript showed ASE and was not differentially expressed  
930 between parental populations of purebred F1 offspring (Fig. S2-S4).

931

### 932 ***Phylogenetic analyses***

933 Gene expression evolves under the combined forces of selection and drift, and is expected to  
934 diverge linearly with increasing phylogenetic distance between closely related species (32). The  
935 magnitude of F1 hybrid misregulation likely also depends on phylogenetic distance between  
936 parental species (33). In order to determine the relationship between expression divergence,  
937 hybrid misregulation, and phylogenetic distance, we constructed a maximum likelihood tree  
938 using RAxML. We excluded all missing sites and sites with more than one alternate allele from  
939 our genomic SNP dataset, leaving 1,737,591 variants across 58 individuals for analyses. We  
940 performed ten separate searches with different random starting trees under the GTRGAMMA  
941 model. Node support was estimated from 1,000 bootstrap samples. We used branch lengths from  
942 the best fitting tree as a measure of phylogenetic distance between populations.

943 We tested whether isolation by distance (kilometers separating populations) was a  
944 significant predictor of gene expression divergence between populations. We also tested whether  
945 isolation by distance explained patterns of misregulation in hybrids generated by inter-population  
946 crosses. Gene expression levels between species cannot be considered to be independent and  
947 identically distributed random variables (34) . We used phylogenetic generalized least-squares  
948 (PGLS) models in R, using the packages ape (35) and nlme to assess whether gene expression  
949 patterns were predicted by distance between populations (measured in kilometers) after  
950 accounting for phylogenetic relatedness. We excluded Osprey Lake populations from these  
951 analyses because outgroup generalist hybrid crosses only involved Crescent Pond generalists.  
952 We used lake diameter as the distance between populations for sympatric comparisons.

953

954 *Morphometrics*

955 We used digital calipers to measure upper oral jaw length and body length from external  
956 landmarks on ethanol-preserved tissue specimens. Upper jaw length was measured from the  
957 quadroarticular joint to the tip of the most anterior tooth on the dentigerous arm of the  
958 premaxilla. Body length was measured from the midline of the posterior margin of the caudal  
959 peduncle to the tip of the lower jaw. We used this measure of body length rather than standard  
960 length to account for size variation because the nasal protrusion on some molluscivore samples  
961 extended beyond the upper jaw. One scale-eater specimen was removed from the analysis  
962 because the caudal region was missing, preventing an accurate measure of body length. All jaw  
963 length measurements were log-transformed and regressed against log-transformed body length to  
964 remove the effects of size variation among specimens. Size-corrected residuals were used for  
965 genome-wide association mapping

966

967 *Association mapping*

968 We employed a Bayesian Sparse Linear Mixed Model (BSLMM) implemented in the GEMMA  
969 software package ((36) v. 0.94.1) to identify genomic regions associated with variation in upper  
970 oral jaw length. We previously used this program to identify candidate genes influencing jaw  
971 size (1). Here, we used the same methods adding 15 individuals to our genomic dataset. Briefly,  
972 the BSLMM uses Markov Chain Monte Carlo sampling to estimate the proportion of phenotypic  
973 variation explained by every SNP included in the analysis (PVE), the proportion of phenotypic  
974 variation explained by SNPs of large effect (PGE), which are defined as SNPs with a non-zero  
975 effect on the phenotype, and the number of large-effect SNPs needed to explain PGE (nSNPs;  
976 Fig. S5). GEMMA also estimates an effect size coefficient ( $\beta$ ) and a posterior inclusion  
977 probability (PIP) for each SNP. We used PIP (the proportion of iterations in which a SNP is  
978 estimated to have a non-zero effect on phenotypic variation ( $\beta \neq 0$ )) to assess the significance of  
979 regions associated with jaw size variation. Because these statistics are difficult to interpret for  
980 causal SNPs tightly linked to neutral SNPs, we summed  $\beta$  and PIP parameters across 20-kb  
981 windows to avoid dispersion of the posterior probability density across SNPs in linkage

982 disequilibrium (LD). Pairwise LD ( $r^2$ ) drops to background levels of LD between SNPs  
983 separated by more than 20 kb (1). GEMMA controls for background population structure by  
984 estimating and incorporating a kinship relatedness matrix as a covariate in the regression model.  
985 We performed 10 independent runs of the BSLMM for 57 individuals (following (37)) using a  
986 step size of 100 million with a burn-in of 50 million steps. Independent runs were consistent in  
987 reporting the strongest associations for the same 20 kb windows. Windows that showed PIP  
988 values above the 99th percentile (0.00175) were considered to be strongly associated with oral  
989 jaw size variation within Caribbean pupfishes. Our PIP estimates for strongly associated  
990 windows suggest that jaw length may be controlled by several loci of moderate effect (see  
991 bimodal PGE distribution, Fig. S5B). Indeed, a linkage mapping analysis of phenotypic diversity  
992 in an F<sub>2</sub> intercross between specialists estimated four QTL with moderate effects on oral jaw size  
993 explaining up to 15% of the variation (38). Encouragingly, the window that showed the strongest  
994 association with jaw size (PIP = 0.1043; Fig. S5) contained a single gene associated with  
995 craniofacial deformities in humans (*samd12*; (39)). Additionally, *clk2*, *gpr119*, *doc2b*, *rapgef4*,  
996 were also within the top four windows showing the highest PIP values.

997

### 998 ***Gene ontology enrichment analyses***

999 We performed a gene ontology (GO) enrichment analysis for the 125 genes in differentiated  
1000 genomic regions showing differential expression between species and misregulation in hybrids  
1001 using ShinyGo v.0.51 (40). The RefSeq genome records for the *Cyprinodon* reference genome  
1002 were annotated by the NCBI Eukaryotic Genome Annotation Pipeline, an automated pipeline  
1003 that annotates genes, transcripts and proteins. Gene symbols for orthologs identified by this  
1004 pipeline largely match human gene symbols. Thus, we searched for enrichment across biological  
1005 process ontologies curated for human gene functions. We also determined whether genes sets  
1006 showing other interesting patterns of expression were annotated for effects on cranial skeletal  
1007 system development (GO:1904888).

1008

1009

1010

## 1011 References

- 1012 1. McGirr JA, Martin CH (2017) Novel candidate genes underlying extreme trophic  
1013 specialization in Caribbean pupfishes. *Mol Biol Evol* 34(4):873–888.
- 1014 2. Richards EJ, Martin CH (2017) Adaptive introgression from distant Caribbean islands  
1015 contributed to the diversification of a microendemic adaptive radiation of trophic  
1016 specialist pupfishes. *PLoS Genetics* 13(8):e1006919.
- 1017 3. McGirr JA, Martin CH (2018) Parallel evolution of gene expression between trophic  
1018 specialists despite divergent genotypes and morphologies. *Evol Lett* 2(2):62–75.
- 1019 4. McGirr JA, Martin CH (2019) Hybrid gene misregulation in multiple developing tissues  
1020 within a recent adaptive radiation of *Cyprinodon* pupfishes. *PLoS One* 14(7):e0218899.
- 1021 5. Lencer ES, McCune AR (2018) An embryonic staging series up to hatching for  
1022 *Cyprinodon variegatus*: An emerging fish model for developmental, evolutionary, and  
1023 ecological research. *J Morphol* 279(11):1559–1578.
- 1024 6. Schilling TF, Kimmel CB (1994) Segment and cell type lineage restrictions during  
1025 pharyngeal arch development in the zebrafish embryo. *Development* 120(3):483–94.
- 1026 7. Lencer ES, Warren WC, Harrison R, McCune AR (2017) The *Cyprinodon variegatus*  
1027 genome reveals gene expression changes underlying differences in skull morphology  
1028 among closely related species. *BMC Genomics* 18(1):424.
- 1029 8. Furutani-Seiki M, Wittbrodt J (2004) Medaka and zebrafish, an evolutionary twin study.  
1030 *Mech Dev* 121(7–8):629–637.
- 1031 9. Li H, Durbin R (2009) Fast and accurate short read alignment with Burrows-Wheeler  
1032 transform. *Bioinformatics* 25(14):1754–60.
- 1033 10. Ewels P, Lundin S, Max K (2016) Data and text mining MultiQC: summarize analysis  
1034 results for multiple tools and samples in a single report. *Bioinformatics* 32:3047–3048.
- 1035 11. Dobin A, et al. (2013) STAR: ultrafast universal RNA-seq aligner. *Bioinformatics*  
1036 29(1):15–21.
- 1037 12. Wang L, Wang S, Li W (2012) RSeQC: quality control of RNA-seq experiments.  
1038 *Bioinformatics* 28(16):2184–5.
- 1039 13. Wang L, et al. (2016) Measure transcript integrity using RNA-seq data. *BMC*  
1040 *Bioinformatics* 17(1):1–16.
- 1041 14. DePristo MA, et al. (2011) A framework for variation discovery and genotyping using  
1042 next-generation DNA sequencing data. *Nat Genet* 43(5):491–8.
- 1043 15. Marsden CD, et al. (2014) Diversity, differentiation, and linkage disequilibrium:  
1044 prospects for association mapping in the malaria vector *Anopheles arabiensis*. *G3*  
1045 4(1):121–31.
- 1046 16. Van De Geijn B, Mcvicker G, Gilad Y, Pritchard JK (2015) WASP: Allele-specific  
1047 software for robust molecular quantitative trait locus discovery. *Nat Methods*  
1048 12(11):1061–1063.
- 1049 17. Degner JF, et al. (2009) Effect of read-mapping biases on detecting allele-specific  
1050 expression from RNA-sequencing data. *Bioinformatics* 25(24):3207–3212.
- 1051 18. Martin SH, et al. (2013) Genome-wide evidence for speciation with gene flow in  
1052 *Heliconius* butterflies. *Genome Res* 23(11):1817–1828.



- 1053 19. Tajima F (1989) Statistical method for testing the neutral mutation hypothesis by DNA  
1054 polymorphism. *Genetics* 123(3):585–95.
- 1055 20. Nielsen R, et al. (2005) Genomic scans for selective sweeps using SNP data. *Genome*  
1056 *Res.* 15(11):1566–75.
- 1057 21. Pavlidis P, Živković D, Stamatakis A, Alachiotis N (2013) SweeD: Likelihood-based  
1058 detection of selective sweeps in thousands of genomes. *Mol Biol Evol* 30(9):2224–2234.
- 1059 22. Schiffels S, Durbin R (2014) Inferring human population size and separation history from  
1060 multiple genome sequences. *Nat Genet* 46(8):919–925.
- 1061 23. Liao Y, Smyth GK, Shi W (2014) Sequence analysis featureCounts: an efficient general  
1062 purpose program for assigning sequence reads to genomic features. *Bioinformatics*  
1063 30(7):923–930.
- 1064 24. Love MI, Huber W, Anders S (2014) Moderated estimation of fold change and dispersion  
1065 for RNA-seq data with DESeq2. *Genome Biol* 15(12):550.
- 1066 25. Cowles CR, Hirschhorn JN, Altshuler D, Lander ES (2002) Detection of regulatory  
1067 variation in mouse genes. *Nat Genet* 32(3):432–437.
- 1068 26. Wittkopp PJ, Haerum BK, Clark AG (2004) Evolutionary changes in *cis* and *trans* gene  
1069 regulation. *Nature* 430(6995):85–8
- 1070 27. Landry CR, et al. (2005) Compensatory *cis-trans* evolution and the dysregulation of gene  
1071 expression in interspecific hybrids of *Drosophila*. *Genetics* 171(4):1813–1822.
- 1072 28. McManus CJ, et al. (2010) Regulatory divergence in *Drosophila* revealed by mRNA-seq.  
1073 *Genome Res* 20(6):816–825.
- 1074 29. Mayba O, et al. (2014) MBASED: Allele-specific expression detection in cancer tissues  
1075 and cell lines. *Genome Biol* 15(8):1–21.
- 1076 30. Goncalves A, et al. (2012) Extensive compensatory *cis-trans* regulation in the evolution  
1077 of mouse gene expression. *Genome Res* 22(12):2376–2384.
- 1078 31. Mack KL, Campbell P, Nachman MW (2016) Gene regulation and speciation in house  
1079 mice. *Genome Res* 26(4):451–61.
- 1080 32. Whitehead A, Crawford DL (2006) Variation within and among species in gene  
1081 expression: Raw material for evolution. *Mol Ecol* 15(5):1197–1211.
- 1082 33. Coolon JD, et al. (2014) Tempo and mode of regulatory evolution in *Drosophila*.  
1083 *Genome Res* 24(5):797–808.
- 1084 34. Felsenstein J (1985) Phylogenies and the Comparative Method. *Am Nat* 125(1):1–15.
- 1085 35. Paradis E, Schliep K (2019) Ape 5.0: an environment for modern phylogenetics and  
1086 evolutionary analyses in R. *Bioinformatics* 35(3):526–528.
- 1087 36. Zhou X, Carbonetto P, Stephens M (2013) Polygenic modeling with bayesian sparse  
1088 linear mixed models. *PLoS Genet* 9(2):e1003264.
- 1089 37. Comeault A et al. (2014) Genome-wide association mapping of phenotypic traits subject  
1090 to a range of intensities of natural selection in *Timema cristinae*. *Am Nat* 183(5):711–27.
- 1091 38. Martin CH, Erickson PA, Miller CT (2017) The genetic architecture of novel trophic  
1092 specialists: larger effect sizes are associated with exceptional oral jaw diversification in a  
1093 pupfish adaptive radiation. *Mol Ecol* 26(2):624–638.

- 1094 39. Oliver GR, et al. (2019) RNA-Seq detects a SAMD12-EXT1 fusion transcript and leads  
1095 to the discovery of an EXT1 deletion in a child with multiple osteochondromas. *Mol*  
1096 *Genet Genomic Med* 7(3):1–13.
- 1097 40. Ge SX, Jung D (2018) ShinyGO: a graphical enrichment tool for animals and plants.  
1098 [biorXiv doi.org/10.1101/315150](https://doi.org/10.1101/315150) (4 May 2018).  
1099
- 1100



1101 **Table S1.** San Salvador Island population genomic statistics measured across 13.8 million SNPs.  
 1102 Statistics for the top three rows were calculated for all San Salvador individuals of each species  
 1103 (see Fig. S1). The remaining rows are comparisons separated by lake populations used to  
 1104 generate samples for RNAseq (CP = Crescent Pond, OL = Osprey Lake).

1105

| <b>population 1</b> | <b>n</b> | <b>population 2</b> | <b>n</b> | <b>mean <math>D_{xy}</math></b> | <b><math>D_{xy}</math> 90th percentile</b> | <b>mean <math>F_{st}</math></b> | <b># fixed SNPs</b> |
|---------------------|----------|---------------------|----------|---------------------------------|--------------------------------------------|---------------------------------|---------------------|
| all generalists     | 8        | all molluscivores   | 10       | 0.0047                          | 0.0076                                     | 0.0564                          | 179                 |
| all generalists     | 8        | all scale-eaters    | 9        | 0.0047                          | 0.0080                                     | 0.1065                          | 5,331               |
| all molluscivores   | 10       | all scale-eaters    | 9        | 0.0049                          | 0.0085                                     | 0.1357                          | 36,335              |
| CP generalists      | 5        | CP molluscivores    | 5        | 0.0042                          | 0.0075                                     | 0.0740                          | 11,015              |
| CP generalists      | 5        | CP scale-eaters     | 5        | 0.0046                          | 0.0082                                     | 0.1356                          | 109,072             |
| CP molluscivores    | 5        | CP scale-eaters     | 5        | 0.0048                          | 0.0093                                     | 0.1839                          | 559,728             |
| OL generalists      | 3        | OL molluscivores    | 5        | 0.0049                          | 0.0084                                     | 0.0964                          | 47,356              |
| OL generalists      | 3        | OL scale-eaters     | 4        | 0.0049                          | 0.0084                                     | 0.1130                          | 108,813             |
| OL molluscivores    | 5        | OL scale-eaters     | 4        | 0.0049                          | 0.0087                                     | 0.1347                          | 168,192             |
| CP generalists      | 5        | OL generalists      | 3        | 0.0049                          | 0.0082                                     | 0.0759                          | 19,582              |
| CP molluscivores    | 5        | OL molluscivores    | 5        | 0.0045                          | 0.0082                                     | 0.1169                          | 92,317              |
| CP scale-eaters     | 5        | OL scale-eaters     | 4        | 0.0035                          | 0.0073                                     | 0.0983                          | 86,367              |

1106

1107

1108

1109

1110

1111

1112

1113

1114

1115

1116

1117

1118

1119

1120

1121 **Table S2.** Percentage of genes controlled by different regulatory mechanisms for each hybrid  
 1122 cross. Informative genes are those containing heterozygous sites in hybrids that were  
 1123 alternatively homozygous in parents. The final column is the percentage of misregulated genes  
 1124 showing no difference in expression between parental populations and allele-specific expression  
 1125 in F1 hybrids, consistent with compensatory regulatory divergence. NC = North Carolina, NP =  
 1126 New Providence, CP = Crescent Pond, OL = Osprey Lake.

1127

| <b>mother</b>   | <b>father</b>   | <b>stage</b> | <b>informative<br/>genes</b> | <b>conserved</b> | <i>cis</i> | <i>trans</i> | <b>compensatory</b> | <b>misregulated</b> | <b>misregulated<br/>showing<br/>compensatory</b> |
|-----------------|-----------------|--------------|------------------------------|------------------|------------|--------------|---------------------|---------------------|--------------------------------------------------|
| NC generalist   | CP generalist   | 2dpf         | 2182                         | 61.18            | 2.66       | 0.37         | 19.98               | 15.81               | 32.75                                            |
| NP generalist   | CP generalist   | 2dpf         | 2359                         | 79.57            | 0.34       | 0.42         | 16.45               | 3.22                | 11.84                                            |
| CP generalist   | CP molluscivore | 2dpf         | 2703                         | 60.82            | 0.18       | 0.26         | 33.70               | 5.03                | 37.50                                            |
| CP generalist   | CP scale-eater  | 2dpf         | 1764                         | 83.50            | 0.17       | 0.17         | 15.87               | 0.28                | 40.00                                            |
| CP molluscivore | CP scale-eater  | 2dpf         | 1645                         | 69.79            | 1.64       | 0.55         | 26.38               | 1.64                | 33.33                                            |
| CP molluscivore | CP generalist   | 2dpf         | 2193                         | 62.79            | 0.14       | 0.05         | 36.07               | 0.96                | 57.14                                            |
| OL generalist   | OL molluscivore | 2dpf         | 3114                         | 46.66            | 0.03       | 0.06         | 34.20               | 19.04               | 38.95                                            |
| OL generalist   | OL scale-eater  | 2dpf         | 1934                         | 62.77            | 0.05       | 0.52         | 22.75               | 13.91               | 18.96                                            |
| OL scale-eater  | OL molluscivore | 2dpf         | 3485                         | 74.09            | 1.03       | 0.69         | 23.39               | 0.80                | 21.43                                            |
| OL molluscivore | OL generalist   | 2dpf         | 2915                         | 59.79            | 0.03       | 0.03         | 37.29               | 2.85                | 38.55                                            |
| OL scale-eater  | OL generalist   | 2dpf         | 2377                         | 57.72            | 0.21       | 0.59         | 29.66               | 11.82               | 31.32                                            |
| NC generalist   | CP generalist   | 8dpf         | 2995                         | 60.13            | 1.40       | 0.07         | 8.41                | 29.98               | 13.47                                            |
| NP generalist   | CP generalist   | 8dpf         | 1406                         | 93.24            | 0.21       | 0.71         | 5.41                | 0.43                | 50.00                                            |
| CP generalist   | CP molluscivore | 8dpf         | 819                          | 87.06            | 0.12       | 0.12         | 9.77                | 2.93                | 20.83                                            |
| CP generalist   | CP scale-eater  | 8dpf         | 1147                         | 81.17            | 0.26       | 0.44         | 6.63                | 11.51               | 13.64                                            |
| CP molluscivore | CP scale-eater  | 8dpf         | 1027                         | 78.87            | 1.85       | 2.04         | 4.48                | 12.76               | 8.40                                             |
| CP molluscivore | CP generalist   | 8dpf         | 1327                         | 88.55            | 0.08       | 0.15         | 10.55               | 0.68                | 33.33                                            |
| OL generalist   | OL molluscivore | 8dpf         | 1322                         | 75.26            | 0.45       | 0.61         | 7.19                | 16.49               | 9.63                                             |
| OL generalist   | OL scale-eater  | 8dpf         | 1273                         | 85.62            | 0.24       | 1.57         | 3.38                | 9.19                | 13.68                                            |
| OL scale-eater  | OL molluscivore | 8dpf         | 984                          | 90.24            | 0.81       | 0.61         | 6.20                | 2.13                | 14.29                                            |
| OL scale-eater  | OL generalist   | 8dpf         | 1087                         | 73.60            | 0.18       | 1.10         | 2.21                | 22.91               | 5.62                                             |

1128

1129

1130

1131

1132

1133

1134

1135

1136

1137 **Table S3.** Number of genes showing differential expression (DE) between species and  
 1138 misregulation in F1 hybrids. Lines separate cross type (top: specialists, middle: generalist and  
 1139 scale-eater, bottom: generalist and molluscivore).

1140

| maternal population | paternal population | informative genes | DE between species | misregulated in F1 | DE and misregulated | stage |
|---------------------|---------------------|-------------------|--------------------|--------------------|---------------------|-------|
| CP molluscivore     | CP scale-eater      | 11718             | 862                | 88                 | 10                  | 2dpf  |
| OL scale-eater      | OL molluscivore     | 11820             | 1900               | 150                | 32                  | 2dpf  |
| CP molluscivore     | CP scale-eater      | 13013             | 4141               | 1208               | 320                 | 8dpf  |
| OL scale-eater      | OL molluscivore     | 13225             | 2020               | 158                | 18                  | 8dpf  |
| CP generalist       | CP scale-eater      | 11671             | 335                | 7                  | 0                   | 2dpf  |
| OL generalist       | OL scale-eater      | 11650             | 1455               | 1453               | 362                 | 2dpf  |
| CP generalist       | CP scale-eater      | 13300             | 716                | 1009               | 87                  | 8dpf  |
| OL generalist       | OL scale-eater      | 13254             | 3918               | 1088               | 244                 | 8dpf  |
| OL scale-eater      | OL generalist       | 11650             | 1455               | 1283               | 38                  | 2dpf  |
| OL scale-eater      | OL generalist       | 13254             | 3918               | 2016               | 72                  | 8dpf  |
| CP generalist       | CP molluscivore     | 12202             | 606                | 536                | 37                  | 2dpf  |
| OL generalist       | OL molluscivore     | 12207             | 97                 | 2142               | 4                   | 2dpf  |
| CP generalist       | CP molluscivore     | 13594             | 371                | 168                | 13                  | 8dpf  |
| OL generalist       | OL molluscivore     | 13697             | 1945               | 1780               | 194                 | 8dpf  |
| CP molluscivore     | CP generalist       | 11814             | 606                | 69                 | 4                   | 2dpf  |
| OL molluscivore     | OL generalist       | 12099             | 97                 | 256                | 0                   | 2dpf  |
| CP molluscivore     | CP generalist       | 13768             | 371                | 31                 | 0                   | 8dpf  |
| OL molluscivore     | OL generalist       | 13694             | 1945               | 443                | 25                  | 8dpf  |

1141

1142

1143

1144

1145

1146

1147

1148

1149

1150

1151 **Table S4.** Genes differentially expressed between species and misregulated in hybrids that were  
 1152 common to both 8dpf Crescent Pond (CP) and Osprey Lake (OL) comparisons.

1153

| cross                         | transcript     | gene          | log2 fold<br>change<br>CP<br>mother vs<br>CP father | log2 fold<br>change OL<br>mother vs<br>OL father | log2 fold<br>change CP<br>parents vs. CP<br>hybrids | log2 fold<br>change OL<br>parents vs. OL<br>hybrids |
|-------------------------------|----------------|---------------|-----------------------------------------------------|--------------------------------------------------|-----------------------------------------------------|-----------------------------------------------------|
| generalist × scale-eater      | XM_015396529.1 | <i>trim47</i> | -1.332                                              | 0.547                                            | -1.332                                              | -1.278                                              |
| generalist × scale-eater      | XM_015405031.1 | <i>krt13</i>  | -1.184                                              | -1.181                                           | -1.183                                              | -1.229                                              |
| generalist × scale-eater      | XM_015380548.1 | <i>s100a1</i> | -1.176                                              | 0.466                                            | -1.176                                              | -0.905                                              |
| scale-eater ×<br>molluscivore | XM_015396195.1 | <i>elovl7</i> | 0.784                                               | -0.641                                           | -0.978                                              | -0.996                                              |

1154

1155

1156

1157

1158

1159

1160

1161

1162

1163

1164

1165

1166

1167

1168

1169

1170

1171

1172

1173 **Table S5.** 360 significantly enriched gene ontology terms for 125 genes showing differential  
 1174 expression between species and misregulation in F1 hybrids found within highly differentiated  
 1175 regions of the genome.

1176

| <b>GO term</b>                                                     | <b>Enrichment<br/>FDR</b> | <b>Genes<br/>in list</b> |
|--------------------------------------------------------------------|---------------------------|--------------------------|
| Muscle structure development                                       | 0.000347                  | 16                       |
| Muscle organ development                                           | 0.000673                  | 12                       |
| Neuron projection development                                      | 0.000673                  | 19                       |
| Cellular component biogenesis                                      | 0.000673                  | 39                       |
| Neuron development                                                 | 0.002059                  | 19                       |
| Response to stress                                                 | 0.002071                  | 43                       |
| Response to abiotic stimulus                                       | 0.002071                  | 19                       |
| Anatomical structure morphogenesis                                 | 0.002071                  | 31                       |
| Animal organ development                                           | 0.002071                  | 38                       |
| System development                                                 | 0.002071                  | 47                       |
| Cellular response to organic cyclic compound                       | 0.002071                  | 13                       |
| Tissue development                                                 | 0.002589                  | 26                       |
| Hindbrain structural organization                                  | 0.002632                  | 2                        |
| Cerebellum structural organization                                 | 0.002632                  | 2                        |
| Cellular response to stress                                        | 0.002632                  | 26                       |
| Negative regulation of neuron differentiation                      | 0.002632                  | 8                        |
| Response to external stimulus                                      | 0.002697                  | 29                       |
| Striated muscle tissue development                                 | 0.002697                  | 10                       |
| Neuron differentiation                                             | 0.002697                  | 20                       |
| Cellular response to nutrient levels                               | 0.002697                  | 8                        |
| Organic substance transport                                        | 0.002996                  | 32                       |
| Generation of neurons                                              | 0.003242                  | 21                       |
| Muscle tissue development                                          | 0.003242                  | 10                       |
| Cell development                                                   | 0.003307                  | 26                       |
| Regulation of neuron projection development                        | 0.00339                   | 11                       |
| Cardiac muscle contraction                                         | 0.003875                  | 6                        |
| Negative regulation of cell development                            | 0.003926                  | 9                        |
| Cellular response to external stimulus                             | 0.003926                  | 9                        |
| Cellular response to extracellular stimulus                        | 0.004413                  | 8                        |
| Cellular component assembly                                        | 0.005139                  | 33                       |
| Nitrogen compound transport                                        | 0.005139                  | 28                       |
| Neurogenesis                                                       | 0.005335                  | 21                       |
| Regulation of anatomical structure morphogenesis                   | 0.005335                  | 16                       |
| Cell differentiation                                               | 0.005335                  | 40                       |
| Protein-containing complex subunit organization                    | 0.005335                  | 27                       |
| Anatomical structure arrangement                                   | 0.005335                  | 3                        |
| Regulation of multicellular organismal development                 | 0.005335                  | 24                       |
| Negative regulation of neuron projection development               | 0.005397                  | 6                        |
| Response to organic cyclic compound                                | 0.005695                  | 15                       |
| Negative regulation of neurogenesis                                | 0.005782                  | 8                        |
| Regulation of neuron differentiation                               | 0.005898                  | 12                       |
| Lateral motor column neuron migration                              | 0.005898                  | 2                        |
| Response to oxygen-containing compound                             | 0.005898                  | 21                       |
| Regulation of plasma membrane bounded cell projection organization | 0.006627                  | 12                       |
| Regulation of cell projection organization                         | 0.007269                  | 12                       |
| Striated muscle cell development                                   | 0.007269                  | 6                        |
| Ribosome biogenesis                                                | 0.007398                  | 8                        |

|                                                                                       |          |    |
|---------------------------------------------------------------------------------------|----------|----|
| Negative regulation of nervous system development                                     | 0.007398 | 8  |
| Striated muscle contraction                                                           | 0.00753  | 6  |
| Fructose catabolic process                                                            | 0.007713 | 2  |
| Positive regulation of metabolic process                                              | 0.007713 | 35 |
| Spinal cord development                                                               | 0.007713 | 5  |
| Cellular protein-containing complex assembly                                          | 0.007713 | 17 |
| Fructose catabolic process to hydroxyacetone phosphate and glyceraldehyde-3-phosphate | 0.007713 | 2  |
| Spinal cord motor neuron migration                                                    | 0.007713 | 2  |
| Actin-mediated cell contraction                                                       | 0.007955 | 5  |
| Regulation of cellular response to heat                                               | 0.007955 | 4  |
| Ribonucleoprotein complex biogenesis                                                  | 0.008043 | 10 |
| Regulation of nervous system development                                              | 0.008242 | 14 |
| Muscle cell development                                                               | 0.00842  | 6  |
| Negative regulation of cell projection organization                                   | 0.008537 | 6  |
| Cellular developmental process                                                        | 0.008827 | 40 |
| Regulation of neurogenesis                                                            | 0.009003 | 13 |
| Plasma membrane bounded cell projection organization                                  | 0.009559 | 19 |
| Regulation of cell development                                                        | 0.009846 | 14 |
| Skeletal muscle organ development                                                     | 0.009846 | 6  |
| Cellular response to heat                                                             | 0.010074 | 5  |
| Chaperone-mediated protein folding                                                    | 0.010116 | 4  |
| RRNA metabolic process                                                                | 0.010443 | 7  |
| Negative regulation of intracellular signal transduction                              | 0.010511 | 10 |
| Regulation of developmental process                                                   | 0.010661 | 27 |
| Protein-containing complex assembly                                                   | 0.010772 | 23 |
| Cell projection organization                                                          | 0.011215 | 19 |
| Muscle cell differentiation                                                           | 0.011641 | 8  |
| Motor neuron migration                                                                | 0.011641 | 2  |
| Movement of cell or subcellular component                                             | 0.011646 | 23 |
| Muscle fiber development                                                              | 0.012324 | 4  |
| Response to nitrogen compound                                                         | 0.012511 | 15 |
| Response to organic substance                                                         | 0.012613 | 32 |
| Nervous system development                                                            | 0.013067 | 25 |
| Neuron projection morphogenesis                                                       | 0.013067 | 11 |
| Cellular response to nitrogen compound                                                | 0.013067 | 11 |
| Striated muscle cell differentiation                                                  | 0.013121 | 7  |
| Response to organonitrogen compound                                                   | 0.013435 | 14 |
| Actin filament-based movement                                                         | 0.013435 | 5  |
| Anterior/posterior axon guidance                                                      | 0.013435 | 2  |
| Cardiac muscle cell development                                                       | 0.013962 | 4  |
| Plasma membrane bounded cell projection morphogenesis                                 | 0.014449 | 11 |
| Cell projection morphogenesis                                                         | 0.014635 | 11 |
| Response to mechanical stimulus                                                       | 0.014808 | 6  |
| Regulation of biological quality                                                      | 0.014808 | 36 |
| Monosaccharide metabolic process                                                      | 0.015408 | 7  |
| Regulation of cell-substrate adhesion                                                 | 0.015572 | 6  |
| G1 to G0 transition                                                                   | 0.01575  | 2  |
| Cardiac cell development                                                              | 0.016095 | 4  |
| Cellular response to organonitrogen compound                                          | 0.016709 | 10 |
| Cell part morphogenesis                                                               | 0.016796 | 11 |
| Positive regulation of developmental process                                          | 0.017118 | 17 |
| Muscle filament sliding                                                               | 0.01717  | 3  |
| Actin-myosin filament sliding                                                         | 0.01717  | 3  |
| Regulation of microtubule polymerization or depolymerization                          | 0.017257 | 4  |
| Desmosome organization                                                                | 0.01743  | 2  |



|                                                                                          |          |    |
|------------------------------------------------------------------------------------------|----------|----|
| RRNA processing                                                                          | 0.01743  | 6  |
| Response to wounding                                                                     | 0.01743  | 11 |
| Regulation of neuron maturation                                                          | 0.01743  | 2  |
| Aggrephagy                                                                               | 0.01743  | 2  |
| Cellular response to chemical stimulus                                                   | 0.018149 | 31 |
| Regulation of keratinocyte differentiation                                               | 0.018299 | 3  |
| Circulatory system development                                                           | 0.018299 | 14 |
| Cellular response to starvation                                                          | 0.018748 | 5  |
| Endonucleolytic cleavage involved in rRNA processing                                     | 0.019353 | 2  |
| Endonucleolytic cleavage of tricistronic rRNA transcript (SSU-rRNA, 5.8S rRNA, LSU-rRNA) | 0.019353 | 2  |
| Protein folding                                                                          | 0.019353 | 6  |
| Post-embryonic development                                                               | 0.019353 | 4  |
| Cerebellum morphogenesis                                                                 | 0.019353 | 3  |
| Monocarboxylic acid metabolic process                                                    | 0.019353 | 10 |
| Regulation of cell differentiation                                                       | 0.019353 | 20 |
| Axon development                                                                         | 0.019353 | 9  |
| Regulation of response to stress                                                         | 0.019353 | 18 |
| Regulation of protein modification by small protein conjugation or removal               | 0.019353 | 6  |
| Intracellular receptor signaling pathway                                                 | 0.01975  | 7  |
| Cellular response to epidermal growth factor stimulus                                    | 0.020014 | 3  |
| Heart contraction                                                                        | 0.020237 | 6  |
| Dendrite development                                                                     | 0.020502 | 6  |
| Microtubule depolymerization                                                             | 0.02085  | 3  |
| Cellular response to nitrogen starvation                                                 | 0.021155 | 2  |
| Cellular response to nitrogen levels                                                     | 0.021155 | 2  |
| Negative regulation of cell morphogenesis involved in differentiation                    | 0.02142  | 4  |
| Organic acid biosynthetic process                                                        | 0.02142  | 8  |
| Carboxylic acid biosynthetic process                                                     | 0.02142  | 8  |
| Regulation of response to stimulus                                                       | 0.02142  | 38 |
| Regulation of developmental growth                                                       | 0.02142  | 7  |
| Regulation of multicellular organismal process                                           | 0.02142  | 29 |
| Cellular response to abiotic stimulus                                                    | 0.02142  | 7  |
| Cellular response to environmental stimulus                                              | 0.02142  | 7  |
| Response to cAMP                                                                         | 0.021439 | 4  |
| Heart process                                                                            | 0.021812 | 6  |
| Purine nucleoside diphosphate metabolic process                                          | 0.021812 | 4  |
| Purine ribonucleoside diphosphate metabolic process                                      | 0.021812 | 4  |
| Response to heat                                                                         | 0.021812 | 5  |
| Hexose metabolic process                                                                 | 0.021812 | 6  |
| Hindbrain morphogenesis                                                                  | 0.021812 | 3  |
| Positive regulation of organ growth                                                      | 0.021812 | 3  |
| Response to epidermal growth factor                                                      | 0.021812 | 3  |
| Ribonucleoside diphosphate metabolic process                                             | 0.02307  | 4  |
| Regulation of response to external stimulus                                              | 0.02307  | 12 |
| Negative regulation of cell differentiation                                              | 0.02314  | 11 |
| RNA processing                                                                           | 0.023278 | 13 |
| Response to peptide hormone                                                              | 0.023278 | 8  |
| Skeletal muscle tissue development                                                       | 0.023395 | 5  |
| Embryo implantation                                                                      | 0.023395 | 3  |
| Positive regulation of developmental growth                                              | 0.024272 | 5  |
| Muscle contraction                                                                       | 0.024451 | 7  |
| Heart development                                                                        | 0.024451 | 9  |
| Response to acid chemical                                                                | 0.026233 | 7  |
| Positive regulation of cellular metabolic process                                        | 0.026233 | 30 |
| Fructose metabolic process                                                               | 0.026609 | 2  |

|                                                      |          |    |
|------------------------------------------------------|----------|----|
| Animal organ morphogenesis                           | 0.026609 | 13 |
| Skeletal muscle thin filament assembly               | 0.026609 | 2  |
| Positive regulation of protein ubiquitination        | 0.026643 | 4  |
| Cell-cell adhesion                                   | 0.027027 | 12 |
| Response to inorganic substance                      | 0.02784  | 9  |
| Macromolecule localization                           | 0.02784  | 29 |
| Regulation of axonogenesis                           | 0.02784  | 5  |
| Cellular macromolecule localization                  | 0.02784  | 20 |
| Myotube differentiation                              | 0.027946 | 4  |
| Hexose catabolic process                             | 0.027946 | 3  |
| Cellular component morphogenesis                     | 0.027946 | 14 |
| Cellular localization                                | 0.027946 | 27 |
| Mesenchyme development                               | 0.027946 | 6  |
| Cellular response to endogenous stimulus             | 0.027946 | 16 |
| Cellular response to organic substance               | 0.028515 | 26 |
| Axonogenesis                                         | 0.029032 | 8  |
| Tube development                                     | 0.029032 | 13 |
| Response to drug                                     | 0.029032 | 13 |
| Positive regulation of neuron differentiation        | 0.029032 | 7  |
| Cellular response to oxygen-containing compound      | 0.029032 | 14 |
| Carboxylic acid metabolic process                    | 0.029103 | 13 |
| Regulation of cellular component organization        | 0.029382 | 24 |
| Cardiac muscle cell differentiation                  | 0.029515 | 4  |
| Response to starvation                               | 0.029555 | 5  |
| Cellular response to steroid hormone stimulus        | 0.029555 | 6  |
| Positive regulation of neuron projection development | 0.02975  | 6  |
| Head development                                     | 0.02975  | 11 |
| Response to insulin                                  | 0.030109 | 6  |
| NAD biosynthetic process                             | 0.030452 | 3  |
| Coenzyme metabolic process                           | 0.031917 | 7  |
| Nucleoside diphosphate metabolic process             | 0.031917 | 4  |
| Skeletal myofibril assembly                          | 0.032288 | 2  |
| Supramolecular fiber organization                    | 0.032357 | 10 |
| Anion transmembrane transport                        | 0.032357 | 6  |
| Polyol metabolic process                             | 0.033638 | 4  |
| Microtubule polymerization or depolymerization       | 0.033638 | 4  |
| Regulation of epidermal cell differentiation         | 0.033638 | 3  |
| Positive regulation of cell projection organization  | 0.033969 | 7  |
| Female pregnancy                                     | 0.034504 | 5  |
| Response to muscle stretch                           | 0.034504 | 2  |
| Neural retina development                            | 0.03529  | 3  |
| Carbohydrate metabolic process                       | 0.03529  | 9  |
| Glucose metabolic process                            | 0.03529  | 5  |
| Protein localization to nucleus                      | 0.03529  | 6  |
| Nucleic acid transport                               | 0.03529  | 5  |
| RNA transport                                        | 0.03529  | 5  |
| Membrane organization                                | 0.03529  | 11 |
| Negative regulation of metabolic process             | 0.035338 | 27 |
| Negative regulation of cell-substrate adhesion       | 0.035338 | 3  |
| Regulation of protein ubiquitination                 | 0.035338 | 5  |
| Response to nutrient levels                          | 0.035338 | 8  |
| Monosaccharide catabolic process                     | 0.035338 | 3  |
| Intracellular transport                              | 0.035338 | 19 |
| Cardiac muscle fiber development                     | 0.035338 | 2  |
| Maternal process involved in female pregnancy        | 0.035338 | 3  |

|                                                                                           |          |    |
|-------------------------------------------------------------------------------------------|----------|----|
| Positive regulation of protein modification by small protein conjugation or removal       | 0.035338 | 4  |
| Establishment of RNA localization                                                         | 0.035735 | 5  |
| Negative regulation of cell adhesion                                                      | 0.036136 | 6  |
| Regulation of cell morphogenesis                                                          | 0.036136 | 8  |
| Lipoprotein metabolic process                                                             | 0.036136 | 4  |
| Organic acid transmembrane transport                                                      | 0.036136 | 4  |
| Carboxylic acid transmembrane transport                                                   | 0.036136 | 4  |
| Regulation of nitric oxide biosynthetic process                                           | 0.03672  | 3  |
| Cardiac muscle tissue development                                                         | 0.03672  | 5  |
| Cleavage involved in rRNA processing                                                      | 0.036849 | 2  |
| Glyceraldehyde-3-phosphate metabolic process                                              | 0.036849 | 2  |
| Muscle cell cellular homeostasis                                                          | 0.036849 | 2  |
| Negative regulation of cellular component organization                                    | 0.036849 | 10 |
| Regulation of cell morphogenesis involved in differentiation                              | 0.037187 | 6  |
| Cellular response to nutrient                                                             | 0.037187 | 3  |
| Maturation of 5.8S rRNA from tricistronic rRNA transcript (SSU-rRNA, 5.8S rRNA, LSU-rRNA) | 0.037741 | 2  |
| Glycerol metabolic process                                                                | 0.037741 | 2  |
| Cytoskeleton organization                                                                 | 0.037741 | 15 |
| Cell adhesion                                                                             | 0.037741 | 16 |
| Detection of external stimulus                                                            | 0.037741 | 4  |
| Negative regulation of signal transduction                                                | 0.037741 | 14 |
| Biological adhesion                                                                       | 0.037741 | 16 |
| Establishment of mitochondrion localization, microtubule-mediated                         | 0.037741 | 2  |
| Amide transport                                                                           | 0.037741 | 21 |
| Regulation of mRNA stability                                                              | 0.037741 | 4  |
| Mitochondrion transport along microtubule                                                 | 0.037741 | 2  |
| Negative regulation of axonogenesis                                                       | 0.037741 | 3  |
| Negative regulation of ERK1 and ERK2 cascade                                              | 0.037741 | 3  |
| Cellular response to amino acid stimulus                                                  | 0.037741 | 3  |
| Cardiac muscle cell action potential                                                      | 0.037741 | 3  |
| Response to peptide                                                                       | 0.037741 | 8  |
| Detection of abiotic stimulus                                                             | 0.038322 | 4  |
| Negative regulation of cellular metabolic process                                         | 0.038322 | 24 |
| Cellular protein localization                                                             | 0.038322 | 19 |
| Positive regulation of cell differentiation                                               | 0.038322 | 12 |
| Response to organophosphorus                                                              | 0.038322 | 4  |
| Regulation of cell adhesion                                                               | 0.038658 | 10 |
| Retina layer formation                                                                    | 0.03906  | 2  |
| Response to steroid hormone                                                               | 0.03906  | 7  |
| Developmental cell growth                                                                 | 0.03906  | 5  |
| Positive regulation of mesonephros development                                            | 0.03906  | 2  |
| Regulation of cellular response to stress                                                 | 0.03906  | 10 |
| Oxoacid metabolic process                                                                 | 0.040117 | 13 |
| Response to endogenous stimulus                                                           | 0.040319 | 17 |
| Response to extracellular stimulus                                                        | 0.040785 | 8  |
| Small molecule biosynthetic process                                                       | 0.040785 | 10 |
| Brain development                                                                         | 0.041395 | 10 |
| Regulation of cellular component movement                                                 | 0.041395 | 12 |
| Regulation of cell maturation                                                             | 0.041395 | 2  |
| Developmental growth                                                                      | 0.041884 | 9  |
| Establishment of protein localization                                                     | 0.041903 | 21 |
| Regulation of neurotransmitter levels                                                     | 0.042553 | 6  |
| Muscle system process                                                                     | 0.042553 | 7  |
| Organic acid metabolic process                                                            | 0.042553 | 13 |

|                                                                    |          |    |
|--------------------------------------------------------------------|----------|----|
| Cellular protein modification process                              | 0.042553 | 34 |
| Glutamine metabolic process                                        | 0.042553 | 2  |
| NADH regeneration                                                  | 0.042553 | 2  |
| Nitric oxide biosynthetic process                                  | 0.042553 | 3  |
| Carbohydrate transport                                             | 0.042553 | 4  |
| Response to temperature stimulus                                   | 0.042553 | 5  |
| Response to hormone                                                | 0.042553 | 12 |
| Regulation of signal transduction                                  | 0.042553 | 28 |
| Endomembrane system organization                                   | 0.042553 | 7  |
| Regulation of cell communication                                   | 0.042553 | 30 |
| Response to purine-containing compound                             | 0.042553 | 4  |
| Protein transport                                                  | 0.042553 | 20 |
| Protein import                                                     | 0.042553 | 5  |
| Alditol metabolic process                                          | 0.042553 | 2  |
| NAD metabolic process                                              | 0.042553 | 3  |
| Regulation of rhodopsin mediated signaling pathway                 | 0.042553 | 2  |
| Regulation of epithelial cell differentiation                      | 0.042553 | 4  |
| Membrane raft organization                                         | 0.042553 | 2  |
| Regulation of response to extracellular stimulus                   | 0.042553 | 2  |
| Regulation of response to nutrient levels                          | 0.042553 | 2  |
| Maintenance of protein location in cell                            | 0.042553 | 3  |
| Cardiocyte differentiation                                         | 0.042553 | 4  |
| Protein modification process                                       | 0.042553 | 34 |
| Regulation of locomotion                                           | 0.042553 | 12 |
| Ribosomal large subunit biogenesis                                 | 0.042553 | 3  |
| Regulation of RNA stability                                        | 0.042553 | 4  |
| Multi-multicellular organism process                               | 0.042553 | 5  |
| Decidualization                                                    | 0.042553 | 2  |
| Reproductive structure development                                 | 0.042553 | 7  |
| Positive regulation of multicellular organismal process            | 0.042553 | 18 |
| Nucleus localization                                               | 0.042553 | 2  |
| Establishment of localization in cell                              | 0.042553 | 21 |
| Establishment of mitochondrion localization                        | 0.042553 | 2  |
| Positive regulation of nervous system development                  | 0.042553 | 8  |
| Regulation of ryanodine-sensitive calcium-release channel activity | 0.042553 | 2  |
| Canonical glycolysis                                               | 0.042553 | 2  |
| Glucose catabolic process to pyruvate                              | 0.042553 | 2  |
| Regulation of anion transmembrane transport                        | 0.042553 | 2  |
| Heterotypic cell-cell adhesion                                     | 0.043292 | 3  |
| Cellular response to lipid                                         | 0.043292 | 9  |
| Reproductive system development                                    | 0.043576 | 7  |
| Cardiac myofibril assembly                                         | 0.043663 | 2  |
| Regulation of mesonephros development                              | 0.043663 | 2  |
| Glycolytic process through fructose-6-phosphate                    | 0.043663 | 2  |
| Glycolytic process through glucose-6-phosphate                     | 0.043663 | 2  |
| Cellular response to hypoxia                                       | 0.044341 | 4  |
| Protein localization                                               | 0.044752 | 25 |
| Transport along microtubule                                        | 0.044752 | 4  |
| Nitric oxide metabolic process                                     | 0.044752 | 3  |
| Maintenance of location                                            | 0.044752 | 6  |
| Microtubule-based transport                                        | 0.044752 | 4  |
| Regulation of signaling                                            | 0.044901 | 30 |
| Keratinocyte differentiation                                       | 0.045069 | 6  |
| Maturation of 5.8S rRNA                                            | 0.045277 | 2  |
| Cell morphogenesis                                                 | 0.045277 | 12 |
| Neuron migration                                                   | 0.045277 | 4  |

|                                                        |          |    |
|--------------------------------------------------------|----------|----|
| RNA localization                                       | 0.045277 | 5  |
| Intracellular protein transport                        | 0.045277 | 13 |
| Cell death                                             | 0.045277 | 21 |
| Posttranscriptional regulation of gene expression      | 0.045277 | 8  |
| Peptide transport                                      | 0.045277 | 20 |
| Regulation of fatty acid metabolic process             | 0.045277 | 3  |
| N-terminal protein amino acid modification             | 0.045277 | 2  |
| Regulation of protein modification process             | 0.045277 | 18 |
| Homotypic cell-cell adhesion                           | 0.045277 | 3  |
| Cholesterol homeostasis                                | 0.045277 | 3  |
| Macromolecule modification                             | 0.045277 | 35 |
| Positive regulation of molecular function              | 0.045277 | 18 |
| Regulation of fatty acid oxidation                     | 0.045277 | 2  |
| Positive regulation of lipid biosynthetic process      | 0.045277 | 3  |
| MRNA transport                                         | 0.045277 | 4  |
| Sterol homeostasis                                     | 0.045277 | 3  |
| Oxidation-reduction process                            | 0.045277 | 12 |
| Regulation of mRNA catabolic process                   | 0.045277 | 4  |
| Response to oxygen levels                              | 0.045277 | 6  |
| Cellular response to vitamin                           | 0.045277 | 2  |
| Positive regulation of animal organ morphogenesis      | 0.045277 | 3  |
| Regulation of cell motility                            | 0.045277 | 11 |
| Reactive nitrogen species metabolic process            | 0.045277 | 3  |
| Positive regulation of macromolecule metabolic process | 0.046773 | 28 |
| Skin development                                       | 0.047322 | 7  |
| Regulation of keratinocyte proliferation               | 0.047462 | 2  |
| Cerebellar Purkinje cell layer development             | 0.047462 | 2  |
| Regulation of microtubule depolymerization             | 0.047462 | 2  |
| Regulation of epidermis development                    | 0.047462 | 3  |
| Cell-substrate adhesion                                | 0.047838 | 6  |
| Cellular response to decreased oxygen levels           | 0.048446 | 4  |
| Muscle organ morphogenesis                             | 0.048446 | 3  |
| Nucleobase-containing compound transport               | 0.049275 | 5  |
| Gluconeogenesis                                        | 0.049438 | 3  |
| Adult walking behavior                                 | 0.049438 | 2  |
| Rhodopsin mediated signaling pathway                   | 0.049438 | 2  |
| Regulation of axon extension involved in axon guidance | 0.049438 | 2  |
| Wound healing                                          | 0.049598 | 8  |

---

1177

1178

1179

1180

1181

1182

1183

1184

1185 **Table S6.** 26 genes showing differential expression between species and misregulation in F1  
 1186 hybrids found within highly differentiated regions of the genome ( $F_{st} = 1$ ;  $D_{xy} \geq$  genome-wide  
 1187 90<sup>th</sup> percentile (values in bold; range = 0.0031 – 0.0075; see table S1 for all population  
 1188 thresholds)) that also show strong signs of a hard selective sweep in specialists (negative  
 1189 Tajima's D < genome-wide 10<sup>th</sup> percentile (values in bold; range = -1.62 – -0.77 (see table S7 for  
 1190 all population thresholds); SweeD composite likelihood ratio > 90<sup>th</sup> percentile for scaffold  
 1191 (values in bold)).

1192

| maternal population | paternal population | stage | gene                | log2 fold change parental populations vs. hybrids | log2 fold change P value | fixed SNPs within 20kb | Tajima's D maternal population | Tajima's D paternal population | CLR maternal population | CLR paternal population | jaw length effect size |
|---------------------|---------------------|-------|---------------------|---------------------------------------------------|--------------------------|------------------------|--------------------------------|--------------------------------|-------------------------|-------------------------|------------------------|
| OL generalist       | OL scale-eater      | 2dpf  | <i>pak3</i>         | 0.804                                             | 0.017                    | 11                     | -0.45                          | <b>-1.33</b>                   | 530.3                   | <b>1241.6</b>           | -5.70E-05              |
| OL generalist       | OL scale-eater      | 2dpf  | <i>mttp</i>         | -1.655                                            | >0.001                   | 111                    | -0.28                          | <b>-1.31</b>                   | 315.9                   | <b>1011.5</b>           | -4.55E-06              |
| OL generalist       | OL scale-eater      | 2dpf  | <i>phgdh</i>        | -0.892                                            | >0.001                   | 8                      | 0.33                           | <b>-1.48</b>                   | 383.9                   | <b>1076.1</b>           | -1.51E-05              |
| OL generalist       | OL scale-eater      | 2dpf  | <i>svil</i>         | 1.398                                             | >0.001                   | 6                      | <b>-0.97</b>                   | <b>-1.53</b>                   | 3136.0                  | <b>4458.7</b>           | -6.55E-05              |
| OL generalist       | OL scale-eater      | 2dpf  | <i>dscam</i>        | 1.434                                             | 0.021                    | 8                      | <b>-1.03</b>                   | <b>-1.34</b>                   | 923.7                   | <b>2663.9</b>           | 1.97E-05               |
| OL generalist       | OL scale-eater      | 2dpf  | <i>dab1</i>         | 0.753                                             | 0.048                    | 24                     | -0.04                          | <b>-1.51</b>                   | 1285.5                  | <b>2755.9</b>           | -3.34E-05              |
| CP generalist       | CP scale-eater      | 8dpf  | <i>dbi</i>          | -1.115                                            | 0.007                    | 3                      | 0.39                           | <b>-1.66</b>                   | 337.5                   | <b>1121.7</b>           | 0.000447               |
| OL scale-eater      | OL molluscivore     | 2dpf  | <i>lct1</i>         | 2.091                                             | 0.045                    | 42                     | <b>-1.75</b>                   | 0.99                           | <b>962.1</b>            | 202.8                   | 6.89E-06               |
| CP molluscivore     | CP scale-eater      | 8dpf  | <i>pdcd11</i>       | 1.457                                             | 0.002                    | 52                     | <b>-1.62</b>                   | -1.41                          | <b>2351.7</b>           | <b>2208.3</b>           | 9.14E-06               |
| CP molluscivore     | CP scale-eater      | 8dpf  | <i>nup205</i>       | 1.016                                             | 0.016                    | 50                     | <b>-1.56</b>                   | -0.87                          | <b>1747.5</b>           | 206.1                   | -4.83E-05              |
| CP molluscivore     | CP scale-eater      | 8dpf  | <i>LOC107098071</i> | 1.168                                             | 0.002                    | 3                      | <b>-1.95</b>                   | -0.68                          | <b>1289.4</b>           | 754.8                   | -1.89E-05              |
| CP molluscivore     | CP scale-eater      | 8dpf  | <i>tm</i>           | 1.371                                             | 0.011                    | 52                     | <b>-1.68</b>                   | <b>-1.66</b>                   | <b>5370.8</b>           | 2041.6                  | -1.88E-05              |
| CP molluscivore     | CP scale-eater      | 8dpf  | <i>nup155</i>       | 1.020                                             | 0.014                    | 4                      | 0.99                           | <b>-1.74</b>                   | 201.4                   | <b>1929.8</b>           | -4.17E-05              |
| CP molluscivore     | CP scale-eater      | 8dpf  | <i>cabp7</i>        | -0.966                                            | 0.038                    | 8                      | -0.14                          | <b>-1.61</b>                   | <b>1480.7</b>           | 161.9                   | 4.59E-06               |
| CP molluscivore     | CP scale-eater      | 8dpf  | <i>ppp5c</i>        | 0.938                                             | 0.020                    | 301                    | <b>-1.64</b>                   | <b>-1.66</b>                   | <b>163.2</b>            | <b>130.4</b>            | 1.77E-06               |
| CP molluscivore     | CP scale-eater      | 8dpf  | <i>unc45a</i>       | 1.097                                             | 0.014                    | 66                     | <b>-1.68</b>                   | <b>-1.66</b>                   | <b>5369.8</b>           | 2042.5                  | -8.92E-06              |
| CP molluscivore     | CP scale-eater      | 8dpf  | <i>polr2b</i>       | 0.550                                             | 0.017                    | 183                    | -1.27                          | <b>-1.71</b>                   | 807.3                   | <b>2203.0</b>           | 4.78E-05               |
| CP molluscivore     | CP scale-eater      | 8dpf  | <i>dusp3</i>        | -1.470                                            | 0.011                    | 21                     | <b>-1.54</b>                   | 0.14                           | 17.0                    | 60.9                    | -4.58E-06              |
| CP molluscivore     | CP scale-eater      | 8dpf  | <i>ndufa4l2</i>     | -0.711                                            | 0.013                    | 19                     | -1.39                          | <b>-1.77</b>                   | <b>3031.1</b>           | <b>2809.3</b>           | 6.31E-07               |
| CP molluscivore     | CP scale-eater      | 8dpf  | <i>psmd11</i>       | 1.022                                             | 0.004                    | 13                     | <b>-1.58</b>                   | 0.94                           | <b>135.8</b>            | <b>125.8</b>            | -8.03E-06              |
| CP molluscivore     | CP scale-eater      | 8dpf  | <i>pde6g</i>        | -1.308                                            | 0.027                    | 30                     | 0.24                           | <b>-1.77</b>                   | <b>1530.2</b>           | <b>1261.4</b>           | -2.01E-06              |
| CP molluscivore     | CP scale-eater      | 8dpf  | <i>map1s</i>        | 0.805                                             | 0.029                    | 7                      | 0.16                           | <b>-1.75</b>                   | 457.8                   | <b>1523.2</b>           | -1.58E-05              |
| CP molluscivore     | CP scale-eater      | 8dpf  | <i>ptprn2</i>       | -0.670                                            | 0.015                    | 29                     | <b>-1.61</b>                   | <b>-1.82</b>                   | <b>2211.6</b>           | 1392.6                  | 1.73E-05               |
| CP molluscivore     | CP scale-eater      | 8dpf  | <i>slc43a1</i>      | 1.140                                             | 0.002                    | 362                    | <b>-1.64</b>                   | -1.49                          | <b>809.6</b>            | <b>662.4</b>            | -3.60E-06              |
| OL scale-eater      | OL molluscivore     | 8dpf  | <i>slc38a8</i>      | -1.516                                            | 0.046                    | 62                     | <b>-1.48</b>                   | -0.13                          | <b>3749.1</b>           | 2435.3                  | 3.80E-05               |
| OL scale-eater      | OL molluscivore     | 8dpf  | <i>sema6c</i>       | -0.607                                            | 0.030                    | 64                     | -0.82                          | <b>-1.82</b>                   | 2253.9                  | <b>3918.3</b>           | -0.00051               |

1193

1194

1195



1196 **Table S7.** San Salvador Island population genomic statistics measured across 13.8 million SNPs.  
1197 Statistics for the top three rows were calculated for all San Salvador individuals of each species  
1198 (see Fig. S1). The remaining rows are comparisons separated by lake populations used to  
1199 generate samples for RNAseq (CP = Crescent Pond, OL = Osprey Lake).

1200

1201

| population        | mean Tajima's D | Tajima's D 10th percentile | mean $\pi$ |
|-------------------|-----------------|----------------------------|------------|
| all generalists   | 0.704649        | -0.90273                   | 0.003029   |
| all molluscivores | 0.565385        | -1.34112                   | 0.002583   |
| all scale-eaters  | 0.210182        | -1.62616                   | 0.002036   |
| CP generalists    | 0.430683        | -1.076                     | 0.002806   |
| CP molluscivores  | 0.097742        | -1.44811                   | 0.00194    |
| CP scale-eaters   | -0.01537        | -1.53413                   | 0.001385   |
| OL generalists    | 0.338391        | -0.77476                   | 0.003022   |
| OL molluscivores  | 0.227443        | -1.37104                   | 0.002458   |
| OL scale-eaters   | 0.14957         | -1.31009                   | 0.00219    |

1207

1208

1209

1210

1211

1212

1213

1214

1215

1216

1217

1218

1219

1220

1221

1222

1223

1224

1225 **Table S8. Ecological DMI candidate genes associated with jaw size.** Nine genes showing  
 1226 differential expression between species and misregulation in F1 hybrids found within highly  
 1227 differentiated regions of the genome ( $F_{st} = 1$ ;  $D_{xy} \geq$  genome-wide 90<sup>th</sup> percentile (values in bold;  
 1228 range = 0.0075 – 0.0031; see table S1 for all population thresholds)) were also in a 20 kb regions  
 1229 significantly associated with oral jaw size variation across our Caribbean pupfish samples  
 1230 (GEMMA PIP > 99<sup>th</sup> percentile (0.00175)). Genes in bold are discussed in the main text. The  
 1231 genes *sema6c* and *dbi* (Table S6) also show signs of a hard selective sweep in specialists  
 1232 (negative Tajima's D < genome-wide 10<sup>th</sup> percentile; range = -1.62 – -0.77 (see table S7 for all  
 1233 population thresholds); SweeD composite likelihood ratio > 90<sup>th</sup> percentile by scaffold (values in  
 1234 bold)).

1235

1236

| maternal population | paternal population | stage | gene           | log2 fold change parental populations vs. hybrids | log2 fold change P value | fixed SNPs within 20kb | Tajima's D maternal population | Tajima's D paternal population | CLR maternal population | CLR paternal population | PIP     | jaw length effect size |
|---------------------|---------------------|-------|----------------|---------------------------------------------------|--------------------------|------------------------|--------------------------------|--------------------------------|-------------------------|-------------------------|---------|------------------------|
| CP generalist       | CP scale-eater      | 8     | <b>mpp1</b>    | -1.48472                                          | 0.001062                 | 170                    | 0.824871                       | -0.57836                       | 1181.48                 | 1364.328                | 0.00255 | 0.000507               |
| CP generalist       | CP scale-eater      | 8     | <i>dbi</i>     | -1.11505                                          | 0.007072                 | 3                      | 0.390309                       | <b>-1.65859</b>                | 337.5028                | <b>1121.688</b>         | 0.00198 | 0.000447               |
| CP molluscivore     | CP scale-eater      | 8     | <i>rc11</i>    | 0.891616                                          | 0.004743                 | 9                      | -0.59334                       | -1.19039                       | 1028.911                | 433.5589                | 0.00379 | 0.000826               |
| CP molluscivore     | CP scale-eater      | 8     | <i>prpf39</i>  | 0.645521                                          | 0.048885                 | 325                    | -1.03984                       | -1.14611                       | 137.0623                | 2474.137                | 0.0025  | -0.00017               |
| CP molluscivore     | CP scale-eater      | 8     | LOC107082296   | -1.43946                                          | 0.005671                 | 2                      | -1.07899                       | -0.35454                       | 289.3542                | 1000.216                | 0.00175 | -1.24E-06              |
| OL generalist       | OL scale-eater      | 8     | <i>rc11</i>    | 0.971193                                          | 0.025532                 | 3                      | -0.46693                       | -1.19082                       | 654.403                 | 1471.226                | 0.00379 | 0.000826               |
| OL scale-eater      | OL molluscivore     | 8     | <b>sema6c</b>  | -0.60673                                          | 0.030178                 | 64                     | -0.81823                       | <b>-1.81724</b>                | 2253.855                | <b>3918.334</b>         | 0.00213 | -0.00051               |
| OL scale-eater      | OL molluscivore     | 8     | <i>mid1ip1</i> | -0.77486                                          | 0.016349                 | 1                      | 0.594817                       | -0.27379                       | 32.32544                | 1237.023                | 0.00185 | 0.000467               |
| CP molluscivore     | CP scale-eater      | 48    | <i>hbae</i>    | 0.934082                                          | 9.95E-06                 | 29                     | -1.3977                        | 1.87904                        | 1218.031                | 41.76962                | 0.00191 | 0.000745               |
| OL generalist       | OL scale-eater      | 48    | <i>ak3</i>     | -0.64731                                          | 0.007329                 | 4                      | -0.79556                       | -1.19082                       | 797.5076                | 1471.226                | 0.00379 | 0.000826               |

1237

1238

1239

1240

1241

1242

1243

1244

1245

1246

1247

1248

1249 **Table S9.** Cross design for 124 transcriptomes. All libraries were prepared with Truseq stranded  
 1250 mRNA kits and sequenced at the Vincent J. Coates Genomic Sequencing Center in either May  
 1251 2018 or June 2018.

1252

| sample ID | stage | sequencing date | parents                                                          |
|-----------|-------|-----------------|------------------------------------------------------------------|
| CAE1      | 8dpf  | May-18          | Crescent Pond generalists                                        |
| CAE2      | 8dpf  | May-18          | Crescent Pond generalists                                        |
| CAE3      | 8dpf  | May-18          | Crescent Pond generalists                                        |
| CAE4      | 8dpf  | May-18          | Crescent Pond generalists                                        |
| CAE5      | 8dpf  | May-18          | Crescent Pond generalists                                        |
| CME1      | 8dpf  | Jul-18          | Crescent Pond snail eaters                                       |
| CME2      | 8dpf  | Jul-18          | Crescent Pond snail eaters                                       |
| CME5      | 8dpf  | Jul-18          | Crescent Pond snail eaters                                       |
| CPE1      | 8dpf  | May-18          | Crescent Pond scale eaters                                       |
| CPE2      | 8dpf  | May-18          | Crescent Pond scale eaters                                       |
| CPE3      | 8dpf  | May-18          | Crescent Pond scale eaters                                       |
| CPE4      | 8dpf  | May-18          | Crescent Pond scale eaters                                       |
| CPE5      | 8dpf  | May-18          | Crescent Pond scale eaters                                       |
| CQE1      | 8dpf  | Jul-18          | New Providence female x New Providence generalist male           |
| CQE2      | 8dpf  | Jul-18          | New Providence female x New Providence generalist male           |
| CQE3      | 8dpf  | Jul-18          | New Providence female x New Providence generalist male           |
| NCE1      | 8dpf  | May-18          | North Carolina generalists                                       |
| NCE2      | 8dpf  | May-18          | North Carolina generalists                                       |
| NCE3      | 8dpf  | May-18          | North Carolina generalists                                       |
| NCE4      | 8dpf  | May-18          | North Carolina generalists                                       |
| NCE5      | 8dpf  | May-18          | North Carolina generalists                                       |
| OAE1      | 8dpf  | May-18          | Osprey Lake generalists                                          |
| OAE2      | 8dpf  | May-18          | Osprey Lake generalists                                          |
| OAE3      | 8dpf  | May-18          | Osprey Lake generalists                                          |
| OAE4      | 8dpf  | May-18          | Osprey Lake generalists                                          |
| OME1      | 8dpf  | May-18          | Osprey Lake snail eaters                                         |
| OME2      | 8dpf  | May-18          | Osprey Lake snail eaters                                         |
| OME3      | 8dpf  | May-18          | Osprey Lake snail eaters                                         |
| OME4      | 8dpf  | May-18          | Osprey Lake snail eaters                                         |
| OME5      | 8dpf  | May-18          | Osprey Lake snail eaters                                         |
| OPE1      | 8dpf  | May-18          | Osprey Lake scale eaters                                         |
| OPE2      | 8dpf  | May-18          | Osprey Lake scale eaters                                         |
| OPE3      | 8dpf  | May-18          | Osprey Lake scale eaters                                         |
| OPE4      | 8dpf  | May-18          | Osprey Lake scale eaters                                         |
| OPE5      | 8dpf  | May-18          | Osprey Lake scale eaters                                         |
| CPU1      | 8dpf  | Jul-18          | Crescent Pond generalist female x Crescent Pond snail eater male |
| CPU3      | 8dpf  | Jul-18          | Crescent Pond generalist female x Crescent Pond snail eater male |

|      |      |        |                                                                   |
|------|------|--------|-------------------------------------------------------------------|
| CPU5 | 8dpf | Jul-18 | Crescent Pond generalist female x Crescent Pond snail eater male  |
| CVE1 | 8dpf | Jul-18 | Crescent Pond generalist female x Crescent Pond scale eater male  |
| CVE2 | 8dpf | Jul-18 | Crescent Pond generalist female x Crescent Pond scale eater male  |
| CVE5 | 8dpf | Jul-18 | Crescent Pond generalist female x Crescent Pond scale eater male  |
| CWE2 | 8dpf | Jul-18 | Crescent Pond snail eater female x Crescent Pond scale eater male |
| CWE3 | 8dpf | Jul-18 | Crescent Pond snail eater female x Crescent Pond scale eater male |
| CWE4 | 8dpf | Jul-18 | Crescent Pond snail eater female x Crescent Pond scale eater male |
| CXE2 | 8dpf | Jul-18 | Crescent Pond snail eater female x Crescent Pond generalist male  |
| CXE3 | 8dpf | Jul-18 | Crescent Pond snail eater female x Crescent Pond generalist male  |
| CXE4 | 8dpf | Jul-18 | Crescent Pond snail eater female x Crescent Pond generalist male  |
| NAE1 | 8dpf | Jul-18 | North Carolina female x Crescent Pond generalist male             |
| NAE2 | 8dpf | Jul-18 | North Carolina female x Crescent Pond generalist male             |
| NAE4 | 8dpf | Jul-18 | North Carolina female x Crescent Pond generalist male             |
| OUE1 | 8dpf | Jul-18 | Osprey Lake generalist female x Osprey Lake snail eater male      |
| OUE3 | 8dpf | Jul-18 | Osprey Lake generalist female x Osprey Lake snail eater male      |
| OUE4 | 8dpf | Jul-18 | Osprey Lake generalist female x Osprey Lake snail eater male      |
| OVE1 | 8dpf | Jul-18 | Osprey Lake generalist female x Osprey Lake scale eater male      |
| OVE4 | 8dpf | Jul-18 | Osprey Lake generalist female x Osprey Lake scale eater male      |
| OVE5 | 8dpf | Jul-18 | Osprey Lake generalist female x Osprey Lake scale eater male      |
| OXE2 | 8dpf | Jul-18 | Osprey Lake snail eater female x Osprey Lake generalist male      |
| OYE1 | 8dpf | May-18 | Osprey Lake scale eater female x Osprey Lake generalist male      |
| OYE2 | 8dpf | May-18 | Osprey Lake scale eater female x Osprey Lake generalist male      |
| OYE3 | 8dpf | May-18 | Osprey Lake scale eater female x Osprey Lake generalist male      |
| OYE4 | 8dpf | May-18 | Osprey Lake scale eater female x Osprey Lake generalist male      |
| OYE5 | 8dpf | May-18 | Osprey Lake scale eater female x Osprey Lake generalist male      |
| OZE2 | 8dpf | Jul-18 | Osprey Lake scale eater female x Osprey Lake snail eater male     |
| OZE4 | 8dpf | Jul-18 | Osprey Lake scale eater female x Osprey Lake snail eater male     |
| OZE5 | 8dpf | Jul-18 | Osprey Lake scale eater female x Osprey Lake snail eater male     |
| PAE1 | 8dpf | Jul-18 | New Providence female x Crescent Pond generalist                  |
| PAE2 | 8dpf | Jul-18 | New Providence female x Crescent Pond generalist                  |
| PAE5 | 8dpf | Jul-18 | New Providence female x Crescent Pond generalist                  |
| CAT1 | 2dpf | May-18 | Crescent Pond generalists                                         |
| CAT2 | 2dpf | May-18 | Crescent Pond generalists                                         |
| CAT3 | 2dpf | May-18 | Crescent Pond generalists                                         |
| CMT1 | 2dpf | Jul-18 | Crescent Pond snail eaters                                        |
| CMT2 | 2dpf | Jul-18 | Crescent Pond snail eaters                                        |
| CMT3 | 2dpf | Jul-18 | Crescent Pond snail eaters                                        |
| CPT1 | 2dpf | May-18 | Crescent Pond scale eaters                                        |
| CPT2 | 2dpf | May-18 | Crescent Pond scale eaters                                        |
| CPT3 | 2dpf | Jul-18 | Crescent Pond scale eaters                                        |
| CQT1 | 2dpf | Jul-18 | New Providence female x New Providence generalist male            |
| CQT2 | 2dpf | Jul-18 | New Providence female x New Providence generalist male            |
| NCT1 | 2dpf | May-18 | North Carolina generalists                                        |
| NCT2 | 2dpf | May-18 | North Carolina generalists                                        |
| NCT3 | 2dpf | May-18 | North Carolina generalists                                        |

|      |      |        |                                                                   |
|------|------|--------|-------------------------------------------------------------------|
| OAT1 | 2dpf | May-18 | Osprey Lake generalists                                           |
| OAT2 | 2dpf | May-18 | Osprey Lake generalists                                           |
| OAT3 | 2dpf | Jul-18 | Osprey Lake generalists                                           |
| OMT1 | 2dpf | May-18 | Osprey Lake snail eaters                                          |
| OMT2 | 2dpf | May-18 | Osprey Lake snail eaters                                          |
| OMT3 | 2dpf | May-18 | Osprey Lake snail eaters                                          |
| OPT1 | 2dpf | May-18 | Osprey Lake scale eaters                                          |
| OPT2 | 2dpf | May-18 | Osprey Lake scale eaters                                          |
| OPT3 | 2dpf | May-18 | Osprey Lake scale eaters                                          |
| CUT1 | 2dpf | Jul-18 | Crescent Pond generalist female x Crescent Pond snail eater male  |
| CUT2 | 2dpf | Jul-18 | Crescent Pond generalist female x Crescent Pond snail eater male  |
| CUT3 | 2dpf | Jul-18 | Crescent Pond generalist female x Crescent Pond snail eater male  |
| CVT1 | 2dpf | May-18 | Crescent Pond generalist female x Crescent Pond scale eater male  |
| CVT2 | 2dpf | May-18 | Crescent Pond generalist female x Crescent Pond scale eater male  |
| CVT3 | 2dpf | May-18 | Crescent Pond generalist female x Crescent Pond scale eater male  |
| CWT1 | 2dpf | May-18 | Crescent Pond snail eater female x Crescent Pond scale eater male |
| CWT2 | 2dpf | May-18 | Crescent Pond snail eater female x Crescent Pond scale eater male |
| CWT3 | 2dpf | May-18 | Crescent Pond snail eater female x Crescent Pond scale eater male |
| CXT1 | 2dpf | May-18 | Crescent Pond snail eater female x Crescent Pond generalist male  |
| CXT2 | 2dpf | May-18 | Crescent Pond snail eater female x Crescent Pond generalist male  |
| CXT3 | 2dpf | May-18 | Crescent Pond snail eater female x Crescent Pond generalist male  |
| NAT1 | 2dpf | May-18 | North Carolina female x Crescent Pond generalist male             |
| NAT2 | 2dpf | May-18 | North Carolina female x Crescent Pond generalist male             |
| NAT3 | 2dpf | May-18 | North Carolina female x Crescent Pond generalist male             |
| OUT1 | 2dpf | Jul-18 | Osprey Lake generalist female x Osprey Lake snail eater male      |
| OUT2 | 2dpf | Jul-18 | Osprey Lake generalist female x Osprey Lake snail eater male      |
| OUT3 | 2dpf | Jul-18 | Osprey Lake generalist female x Osprey Lake snail eater male      |
| OVT1 | 2dpf | May-18 | Osprey Lake generalist female x Osprey Lake scale eater male      |
| OVT2 | 2dpf | May-18 | Osprey Lake generalist female x Osprey Lake scale eater male      |
| OVT3 | 2dpf | May-18 | Osprey Lake generalist female x Osprey Lake scale eater male      |
| OXT1 | 2dpf | Jul-18 | Osprey Lake snail eater female x Osprey Lake generalist male      |
| OXT2 | 2dpf | Jul-18 | Osprey Lake snail eater female x Osprey Lake generalist male      |
| OXT3 | 2dpf | Jul-18 | Osprey Lake snail eater female x Osprey Lake generalist male      |
| OYT1 | 2dpf | May-18 | Osprey Lake scale eater female x Osprey Lake generalist male      |
| OYT2 | 2dpf | May-18 | Osprey Lake scale eater female x Osprey Lake generalist male      |
| OYT3 | 2dpf | May-18 | Osprey Lake scale eater female x Osprey Lake generalist male      |
| OZT1 | 2dpf | Jul-18 | Osprey Lake scale eater female x Osprey Lake snail eater male     |
| OZT2 | 2dpf | Jul-18 | Osprey Lake scale eater female x Osprey Lake snail eater male     |
| OZT3 | 2dpf | Jul-18 | Osprey Lake scale eater female x Osprey Lake snail eater male     |
| PAT1 | 2dpf | May-18 | New Providence female x Crescent Pond generalist                  |
| PAT2 | 2dpf | May-18 | New Providence female x Crescent Pond generalist                  |
| PAT3 | 2dpf | May-18 | New Providence female x Crescent Pond generalist                  |

1253

1254

1255  
1256  
1257  
1258  
1259  
1260  
1261  
1262  
1263  
1264  
1265  
1266  
1267  
1268  
1269  
1270  
1271  
1272  
1273  
1274  
1275  
1276  
1277  
1278  
1279

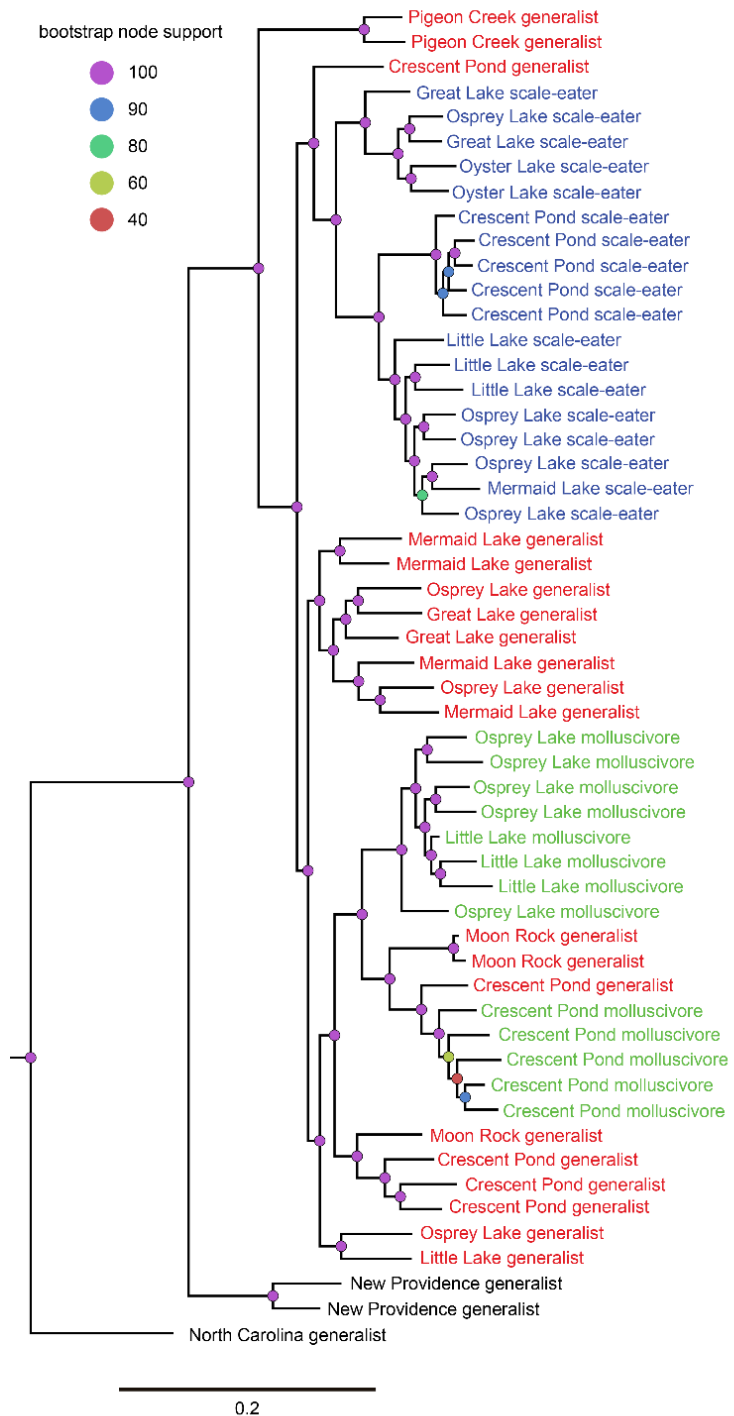

1280  
1281  
1282  
1283

**Fig S1.** Maximum likelihood tree generated using RAxML with 1.7 million SNPs showing phylogenetic relationships between 55 *Cyprinodon* individuals. Relationships for three outgroup individuals that were included in the genomic dataset are not shown. Red = San Salvador generalist, green = molluscivore, blue = scale-eater, black = outgroup generalist.



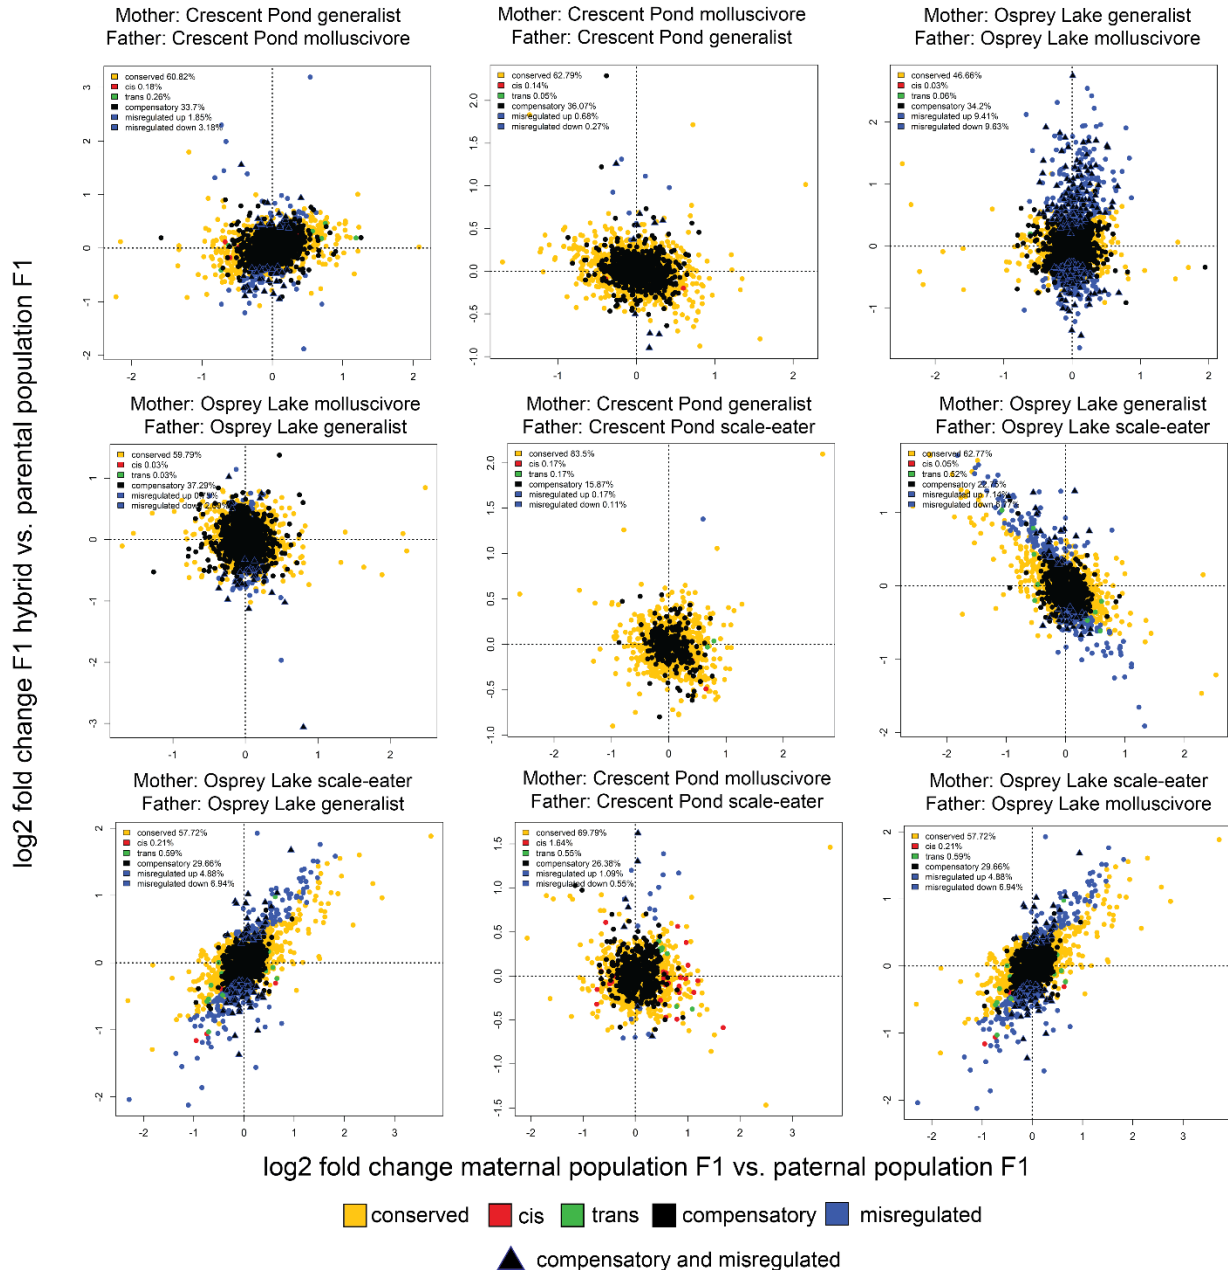

1284

1285 **Fig S2.** Regulatory mechanisms underlying expression divergence at 2 dpf in San Salvador  
 1286 crosses. Yellow = conserved (no difference in expression between any group or ambiguous  
 1287 expression patterns), red = *cis* (significant ASE in hybrids, significant differential expression  
 1288 between parental populations of purebred F1 offspring, and no significant *trans*- contribution),  
 1289 green = *trans* (significant ASE in hybrids, significant differential expression between parental  
 1290 populations of purebred F1 offspring, and significant *trans*- contribution), black = compensatory  
 1291 (significant ASE in hybrids, no significant differential expression between parental populations  
 1292 of purebred F1 offspring), blue = misregulated (significant differential expression between  
 1293 purebred F1 and hybrid F1), triangle = compensatory and misregulated.

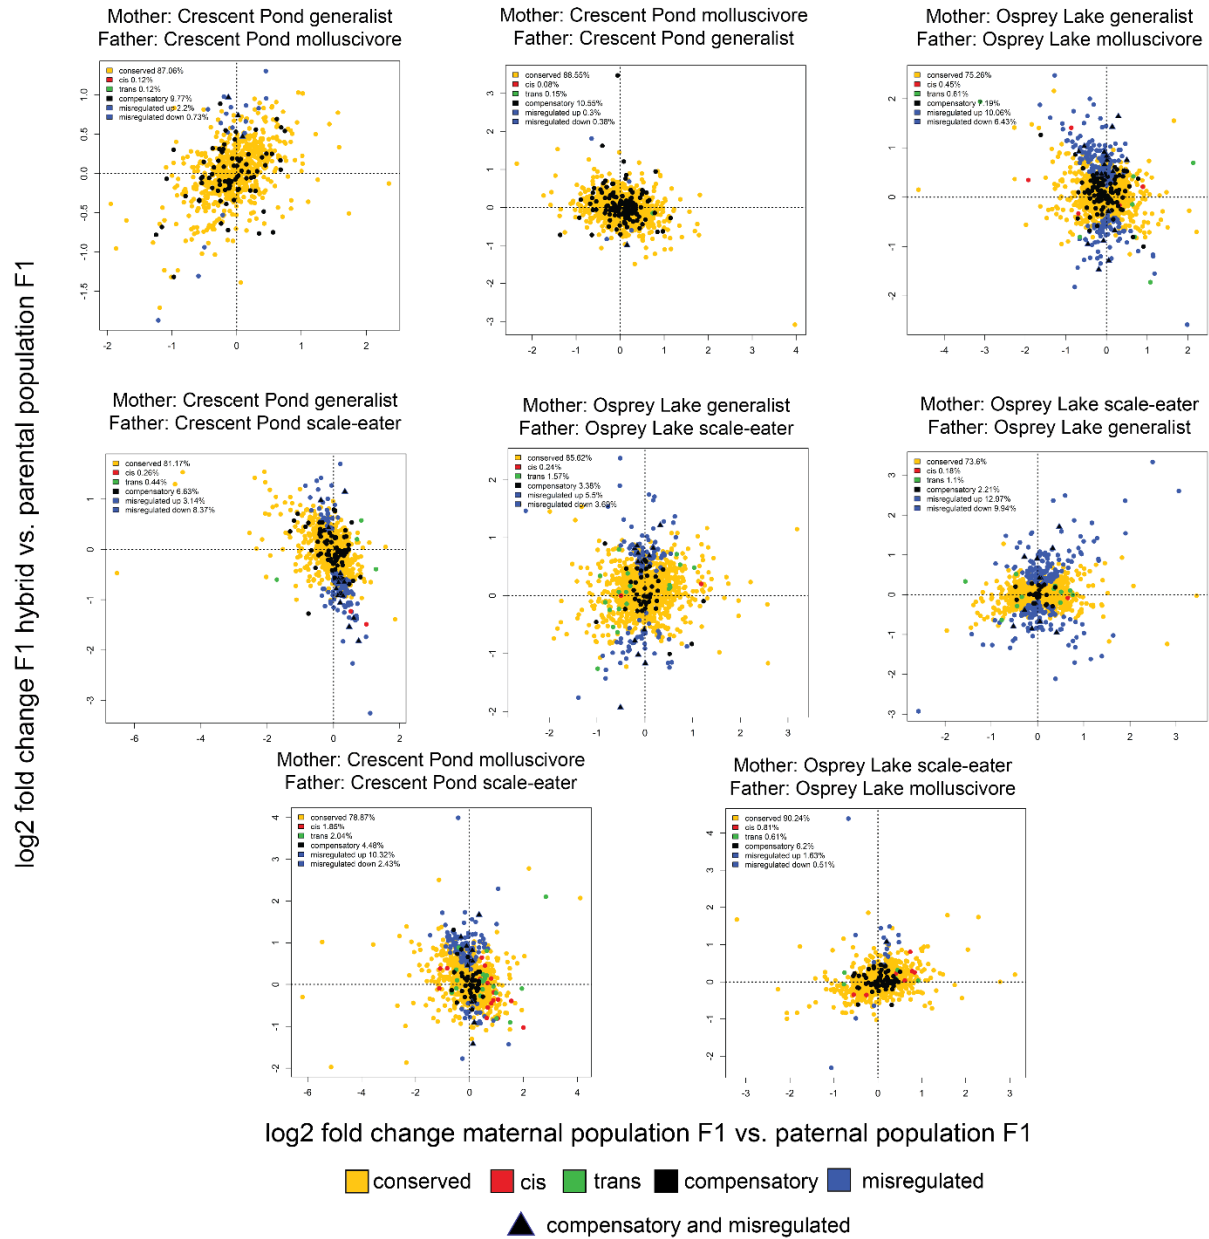

1294

1295

1296 **Fig S3.** Regulatory mechanisms underlying expression divergence at 8 dpf in San Salvador  
 1297 crosses. Yellow = conserved (no difference in expression between any group or ambiguous  
 1298 expression patterns), red = *cis* (significant ASE in hybrids, significant differential expression  
 1299 between parental populations of purebred F1 offspring, and no significant *trans*- contribution),  
 1300 green = *trans* (significant ASE in hybrids, significant differential expression between parental  
 1301 populations of purebred F1 offspring, and significant *trans*- contribution), black = compensatory  
 1302 (significant ASE in hybrids, no significant differential expression between parental populations  
 1303 of purebred F1 offspring), blue = misregulated (significant differential expression between  
 1304 purebred F1 and hybrid F1), triangle = compensatory and misregulated.

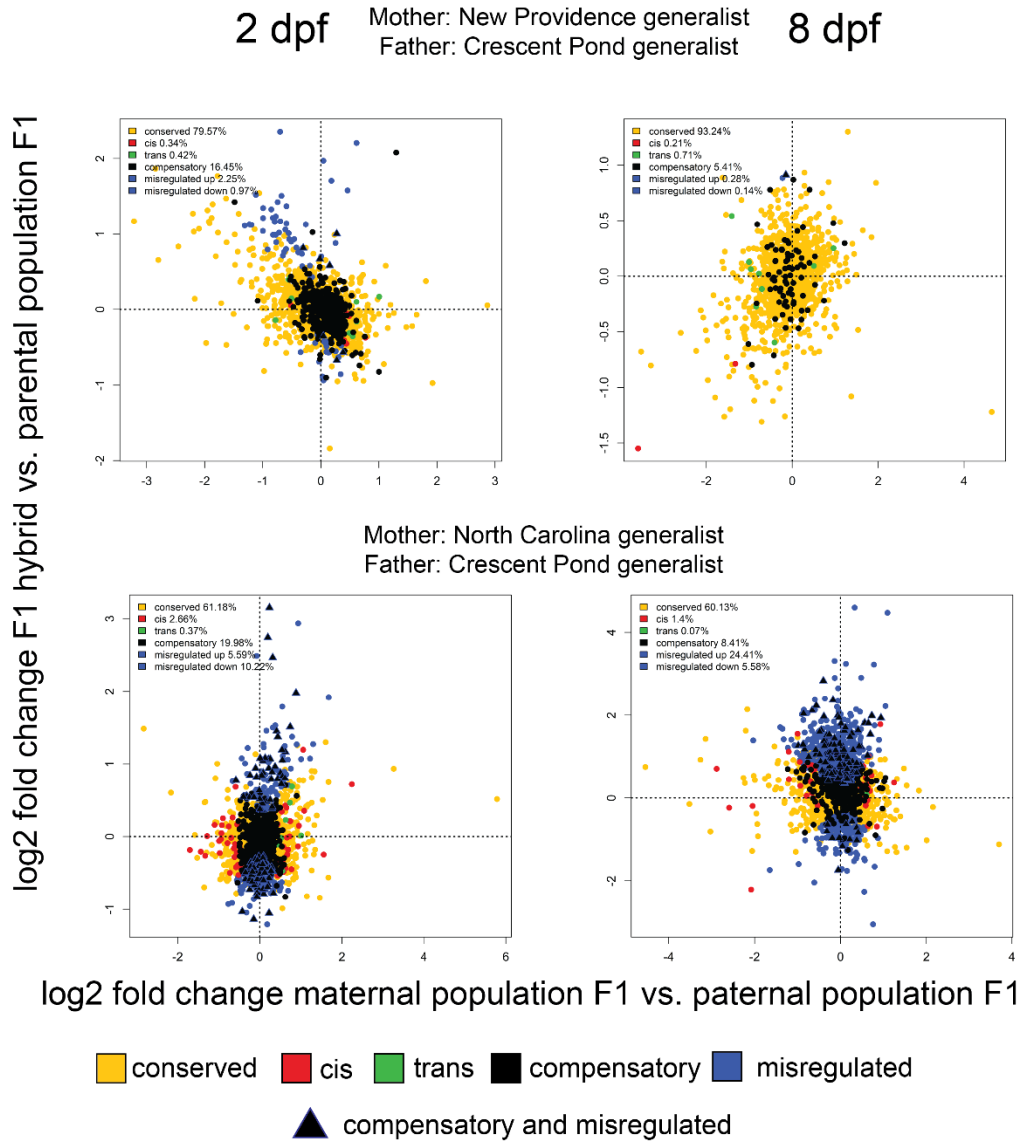

1305 **Fig S4.** Regulatory mechanisms underlying expression divergence in outgroup generalist  
 1306 population crosses. Yellow = conserved (no difference in expression between any group or  
 1307 ambiguous expression patterns), red = *cis* (significant ASE in hybrids, significant differential  
 1308 expression between parental populations of purebred F1 offspring, and no significant *trans*-  
 1309 contribution), green = *trans* (significant ASE in hybrids, significant differential expression  
 1310 between parental populations of purebred F1 offspring, and significant *trans*- contribution),  
 1311 black = compensatory (significant ASE in hybrids, no significant differential expression between  
 1312 parental populations of purebred F1 offspring), blue = misregulated (significant differential  
 1313 expression between purebred F1 and hybrid F1), triangle = compensatory and misregulated.

1314

1315

1316

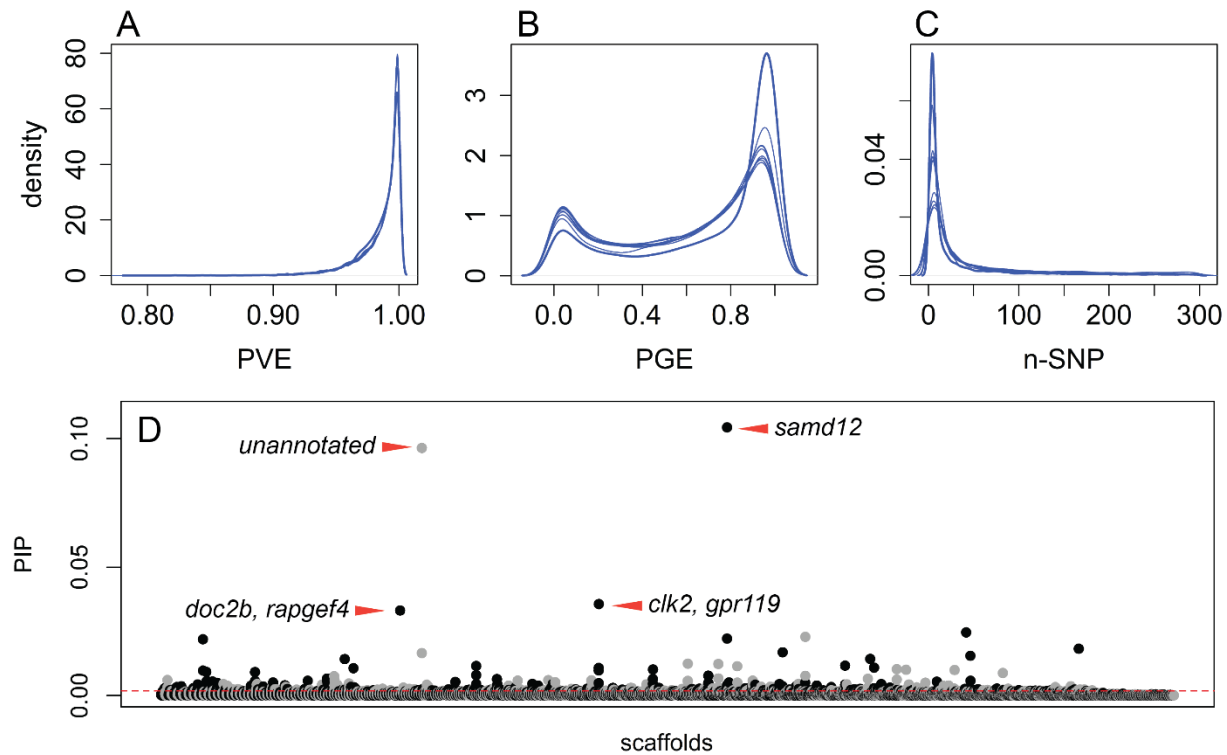

1317

1318 **Fig. S5. Genome-wide association mapping.** GEMMA implements a Bayesian sparse linear  
1319 mixed model (BSLMM) that uses MCMC to estimate the proportion of phenotypic variation  
1320 explained by every SNP included in the analysis (A; PVE), the proportion of phenotypic  
1321 variation explained by SNPs of large effect (B; PGE), which are defined as SNPs with a non-  
1322 zero effect on the phenotype, and the number of large-effect SNPs needed to explain PGE (C;  
1323 nSNPs). Each blue line represents one of ten independent runs of the BSLMM. D) Posterior  
1324 inclusion probability for 20 kb windows across all scaffolds (alternating black and grey for each  
1325 scaffold). Windows that showed PIP values above the 99th percentile (0.00175; dotted red line)  
1326 were considered to have a significant effect on jaw size variation. Red arrows indicate genes  
1327 within top four windows (*samd12*, *clk2*, *gpr119*, *doc2b*, *rapgef4*).

1328

1329

1330

1331

1332

1333

1334

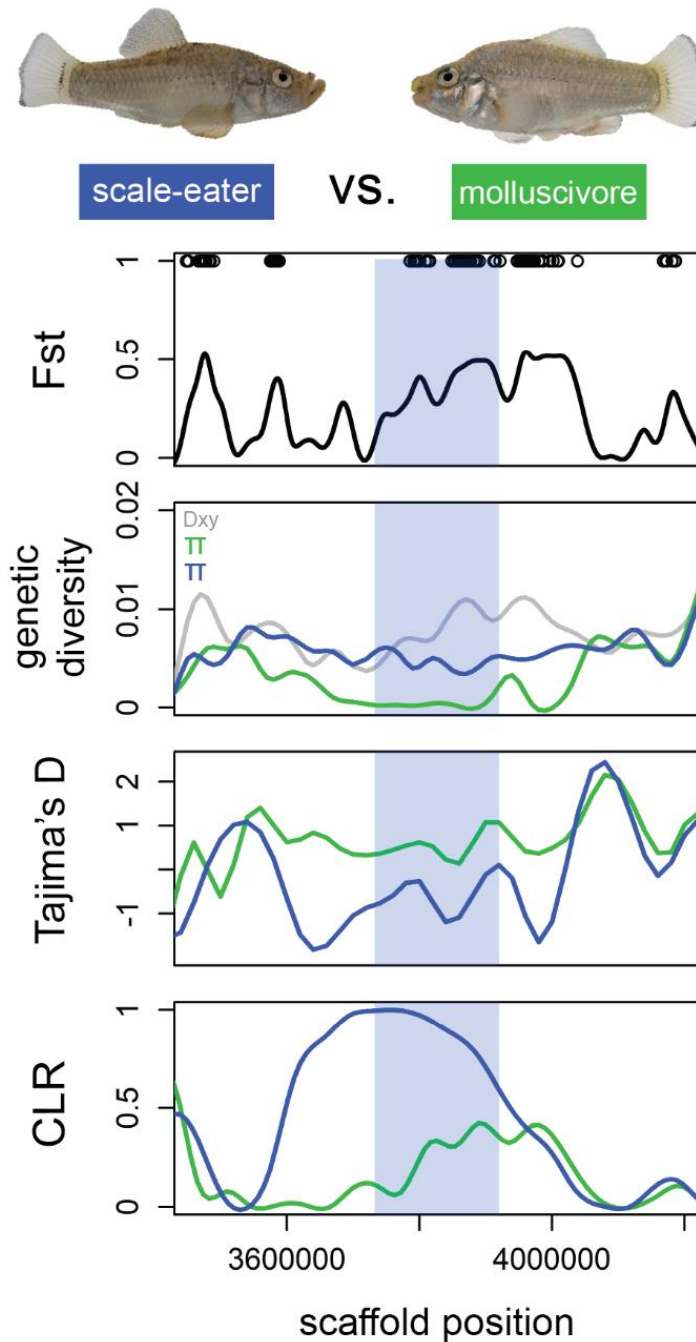

1335 **Fig S6.** The *sema6c* gene region (light blue) contains 64 SNPs fixed between Osprey Lake scale-  
1336 eaters (blue) vs. molluscivores (green), shows strong between-population divergence and low  
1337 within-population diversity, shows strong signs of a hard selective sweep, and is significantly  
1338 associated with oral jaw length variation in a genome-wide association analysis using GEMMA  
1339 (Table S8).

1340

1341

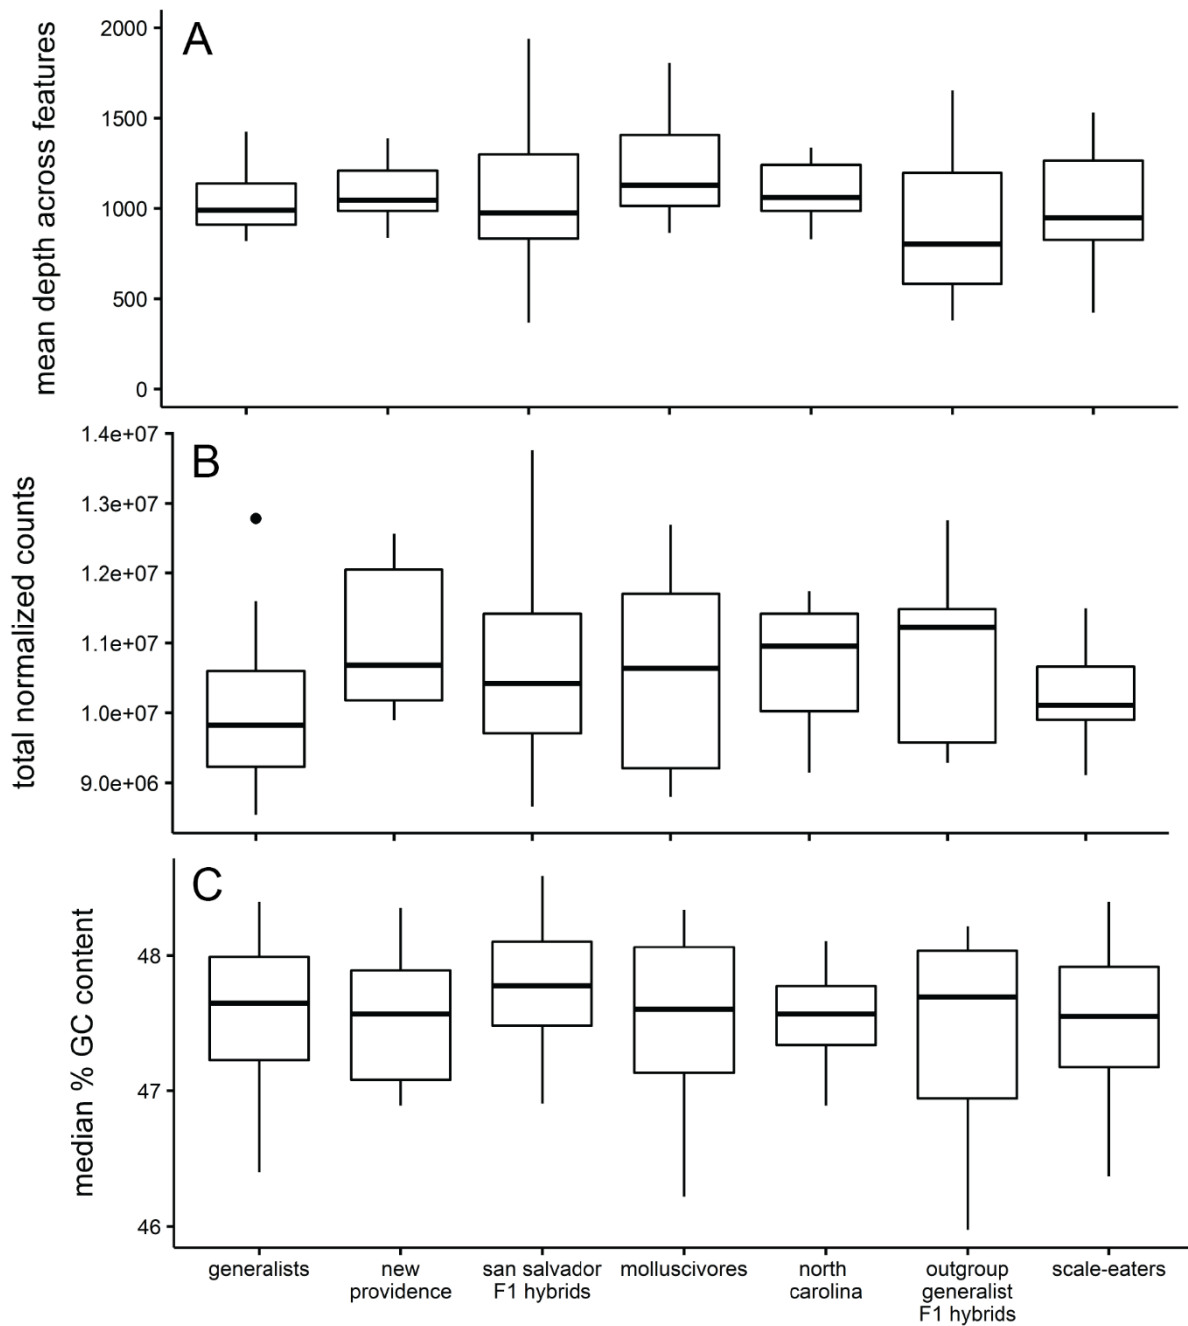

1342 **Fig S7.** No significant difference among F1 purebred and F1 hybrid samples for A) mean read  
1343 depth across annotated features (ANOVA;  $P = 0.32$ ), B) total normalized read counts (ANOVA;  
1344  $P = 0.16$ ), C) median percent GC content of reads (ANOVA;  $P = 0.32$ ).

1345

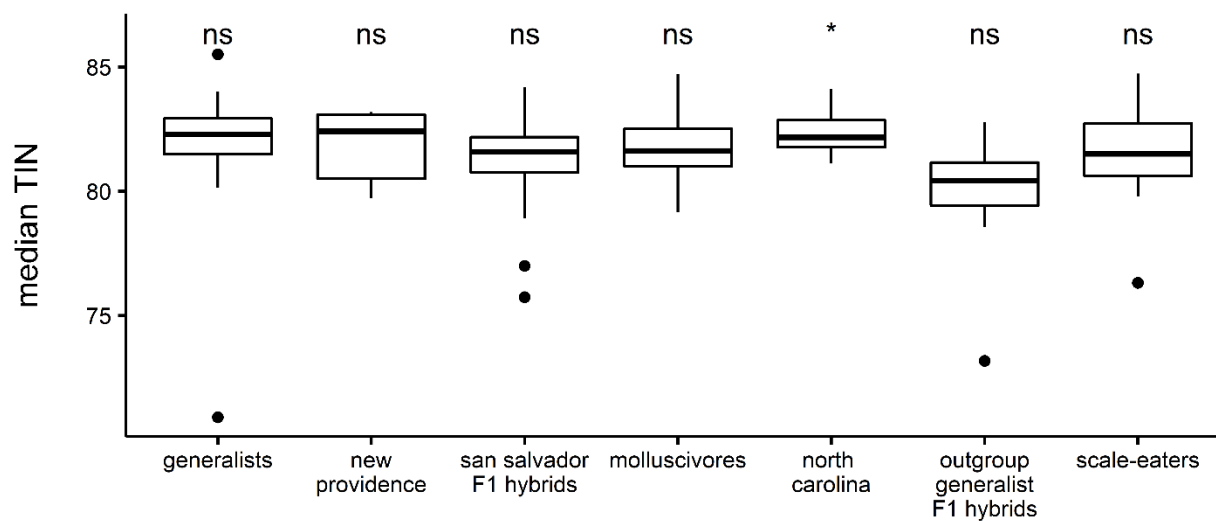

1346 **Fig S8.** Median transcript integrity numbers for each species and generalist population. Tukey  
1347 post-hoc test:  $P < 0.05 = *$ ;  $P > 0.05 = ns$ .

1348  
1349  
1350  
1351  
1352  
1353  
1354  
1355  
1356  
1357  
1358  
1359  
1360  
1361  
1362  
1363  
1364



1365

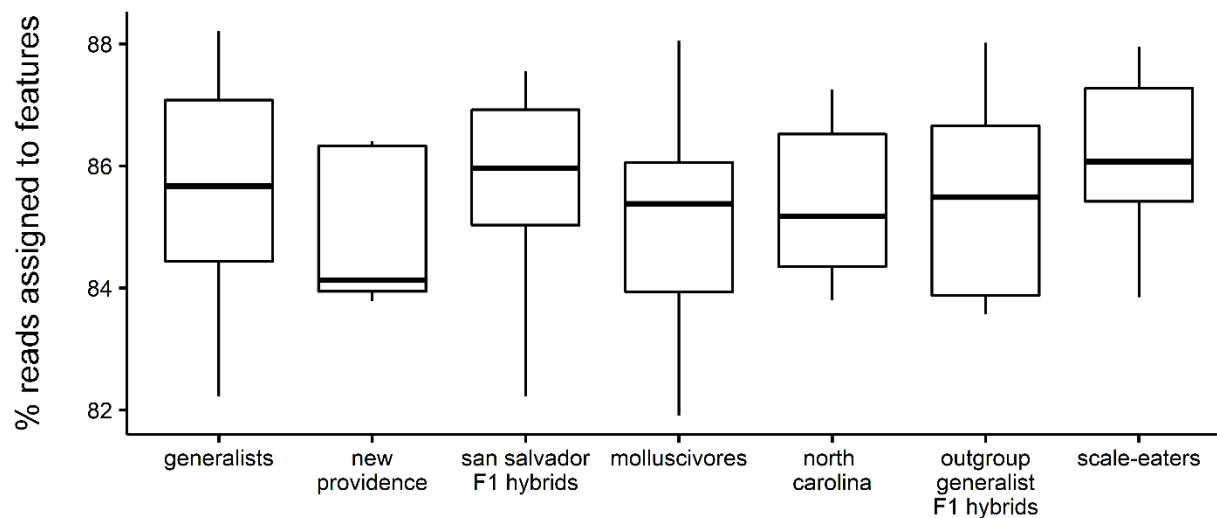

1366

1367 **Fig S9.** No significant difference in the percentage of reads mapping to annotated features of the  
1368 *Cyprinodon* reference genome among F1 purebred and F1 hybrid samples (ANOVA;  $P = 0.17$ ).

1369

1370

1371

1372

1373

1374

1375

1376

1377

1378

1379

1380

1381

1382

1383

1384

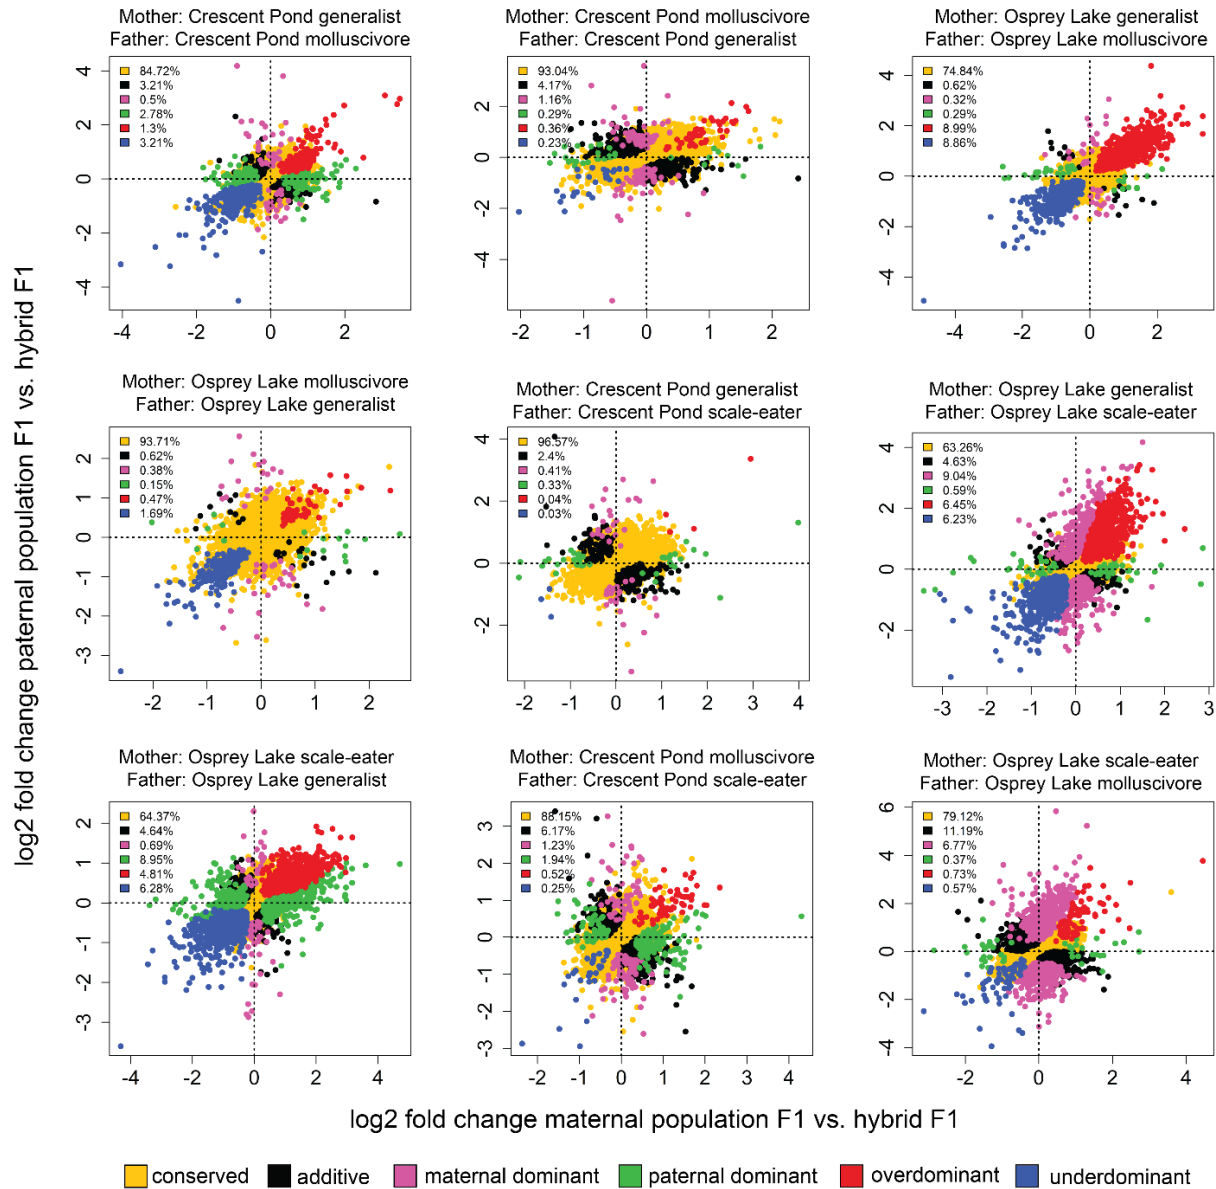

1385

1386 **Fig S10.** Gene expression inheritance for 2 dpf San Salvador hybrid crosses. Yellow = conserved  
 1387 (no difference in expression between groups or ambiguous expression patterns), black = additive  
 1388 (differential expression between purebred F1 and intermediate expression levels in hybrid F1),  
 1389 pink = maternal dominant (differential expression between purebred F1, differential expression  
 1390 between paternal population purebred F1 and F1 hybrids, no differential expression between  
 1391 maternal population purebred F1 and F1 hybrids), green = paternal dominant (differential  
 1392 expression between purebred F1, differential expression between maternal population purebred  
 1393 F1 and F1 hybrids, no differential expression between paternal population purebred F1 and F1  
 1394 hybrids), red = overdominant (F1 hybrid gene expression significantly higher than parental  
 1395 population purebred F1), blue = underdominant (F1 hybrid gene expression significantly lower  
 1396 than parental population purebred F1).

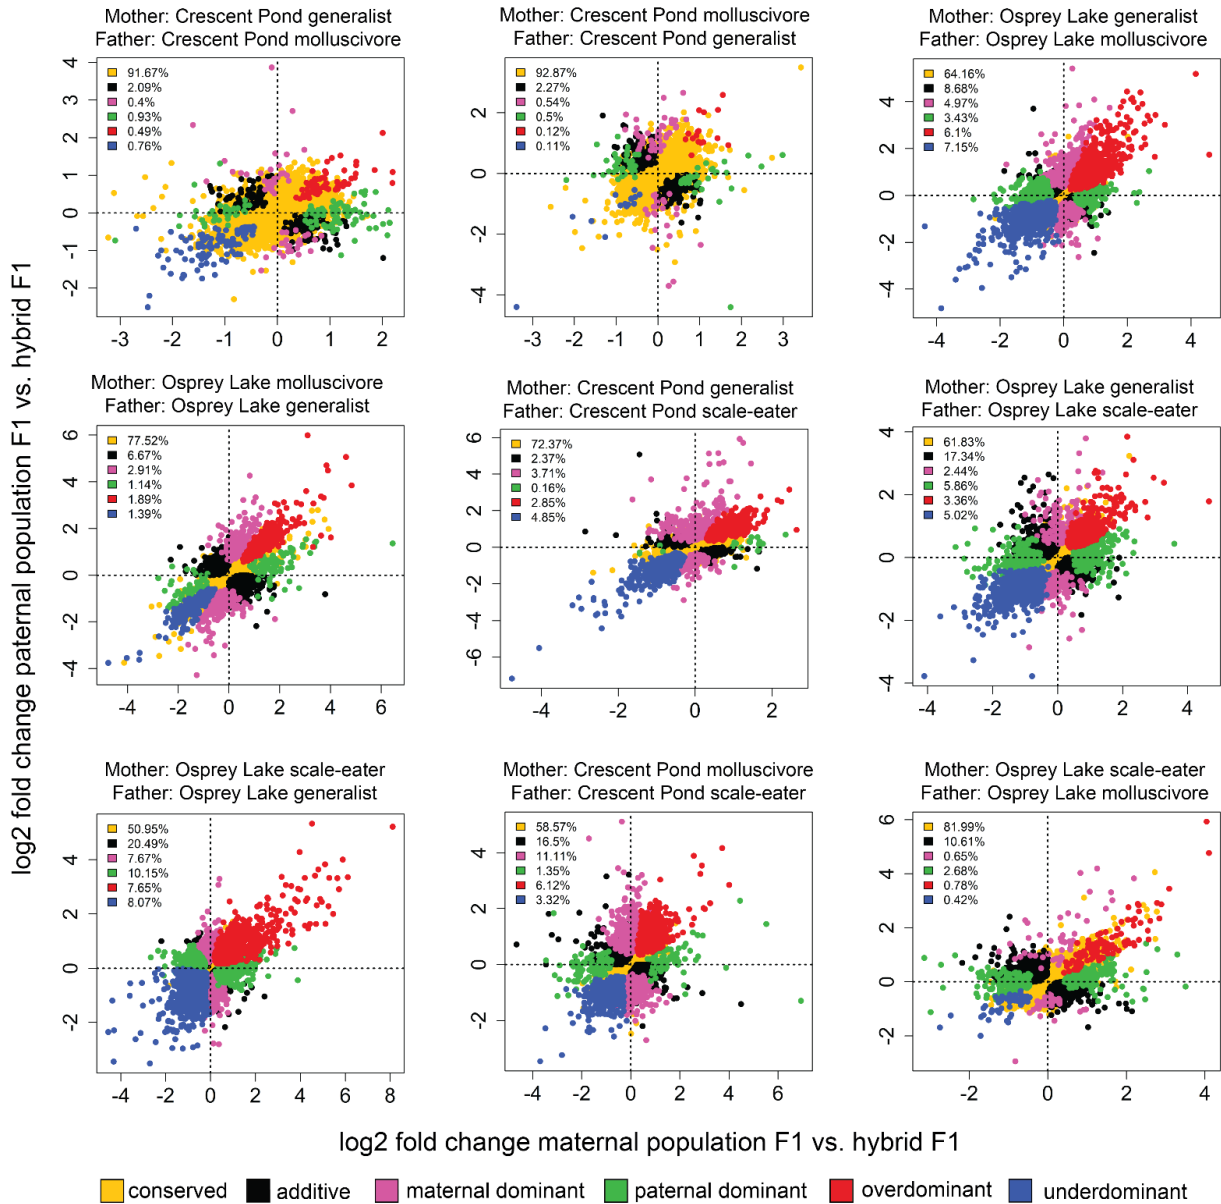

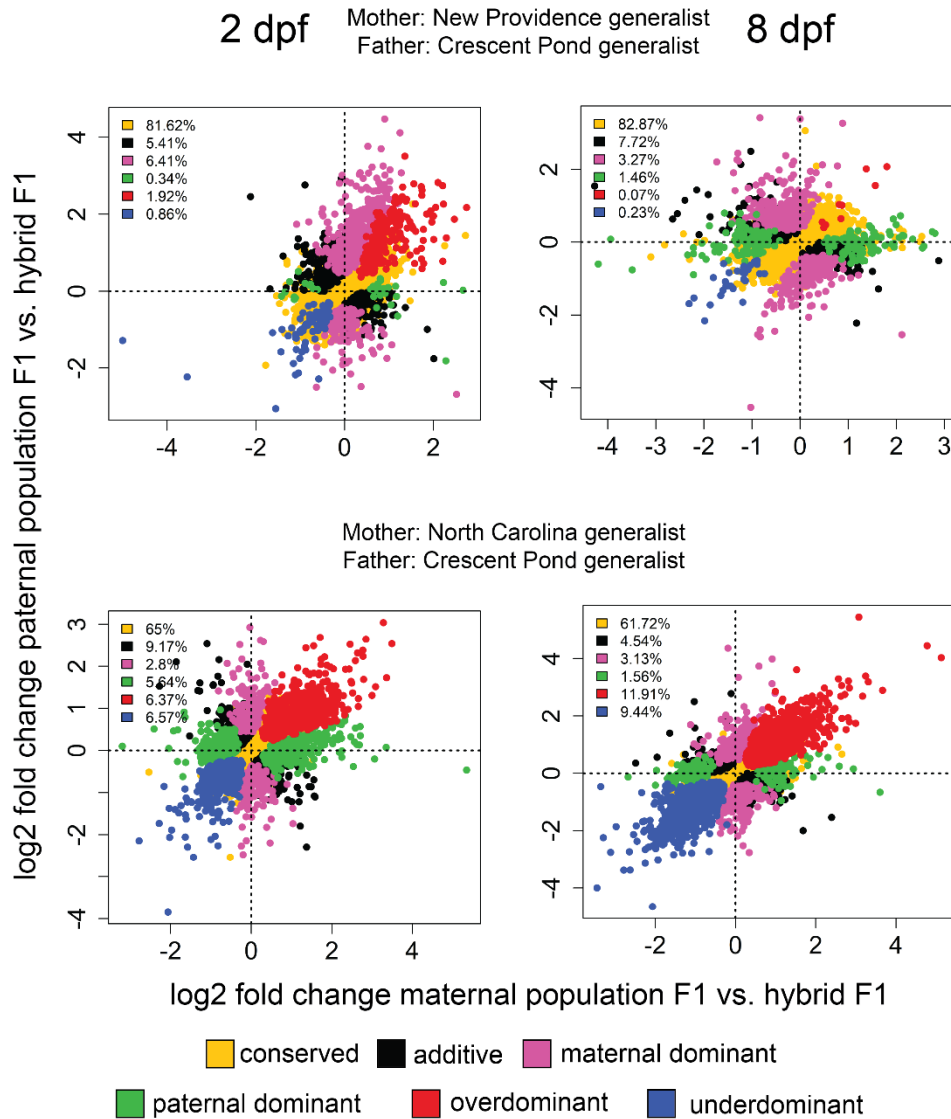

1409 **Fig S12.** Gene expression inheritance for outgroup generalist population hybrid crosses. Yellow  
 1410 = conserved (no difference in expression between groups or ambiguous expression patterns),  
 1411 black = additive (differential expression between purebred F1 and intermediate expression levels  
 1412 in hybrid F1), pink = maternal dominant (differential expression between purebred F1,  
 1413 differential expression between paternal population purebred F1 and F1 hybrids, no differential  
 1414 expression between maternal population purebred F1 and F1 hybrids), green = paternal dominant  
 1415 (differential expression between purebred F1, differential expression between maternal  
 1416 population purebred F1 and F1 hybrids, no differential expression between paternal population  
 1417 purebred F1 and F1 hybrids), red = overdominant (F1 hybrid gene expression significantly  
 1418 higher than parental population purebred F1), blue = underdominant (F1 hybrid gene expression  
 1419 significantly lower than parental population purebred F1).

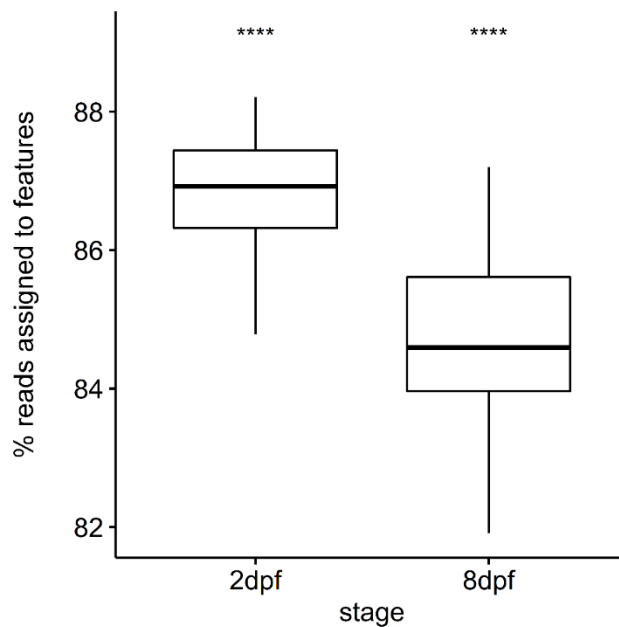

**Fig S13.** More reads assigned to features for 2 dpf samples than 8 dpf samples (Student's *t*-test;  $P < 2.2 \times 10^{-16}$ ).

1420  
1421  
1422  
1423  
1424  
1425  
1426  
1427  
1428  
1429  
1430  
1431  
1432  
1433  
1434  
1435  
1436  
1437

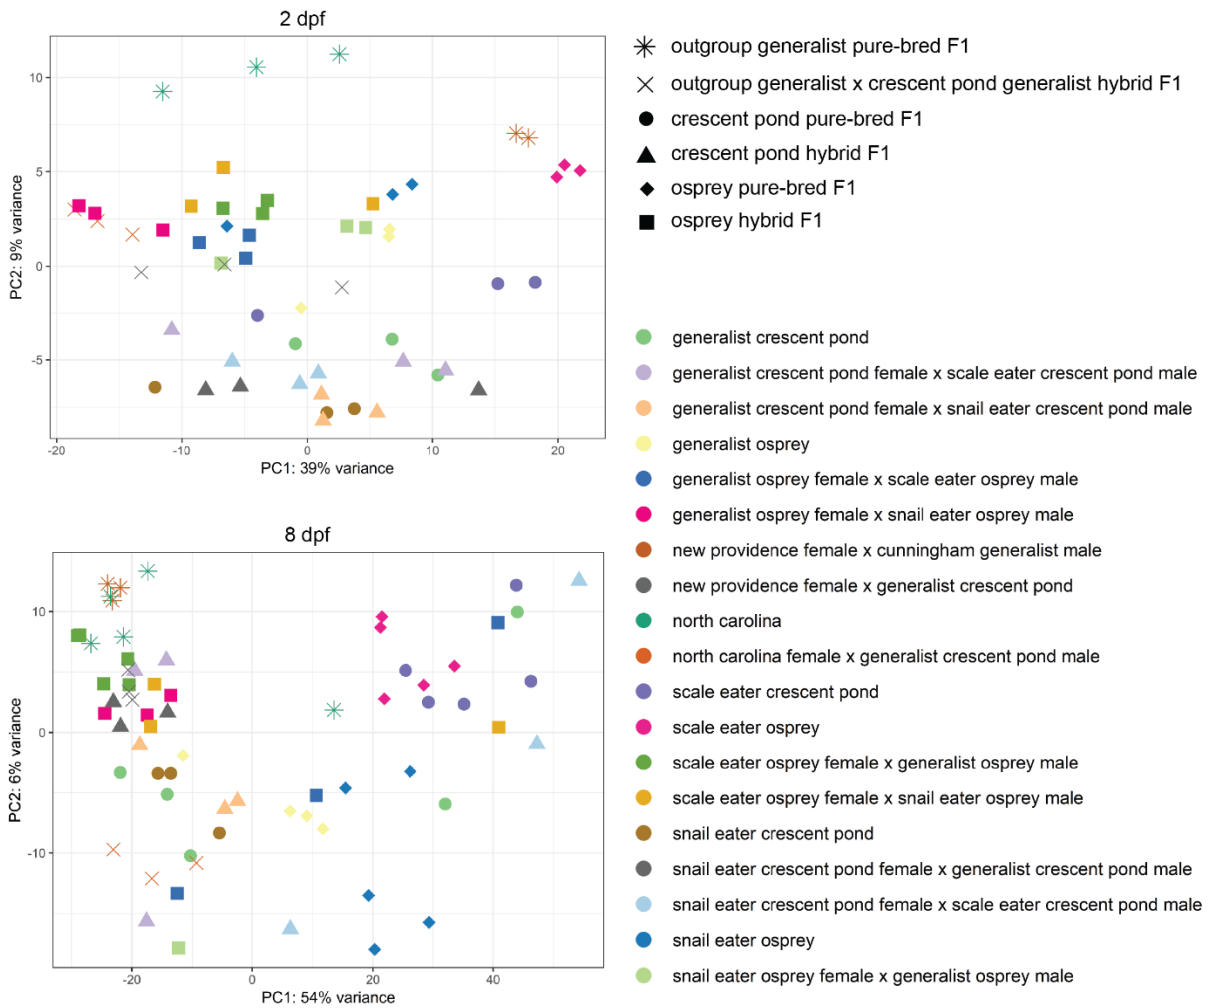

1438

1439 **Fig S14.** First two principal components explaining 48% (2 dpf) and 60% (8 dpf) of the variance  
 1440 across normalized read counts.

1441

1442
